# Supplementary material for: U2af1S34F and U2af1Q157R myeloid neoplasm-associated hotspot mutations induce distinct hematopoietic phenotypes in mice
Source: Research Square preprint supplement (doi:10.21203/rs.3.rs-6377810/v1), 2025-05-07
Supplement: Supplementary file 17 [file Table S19 Genomic data input for co-occurrence and mutual exclusivity analysis.xlsx]

## Sheet: Number of patients in analysis
Summary	AML	sAML	MDS	CMML	MPN	All patients
Total number of patients with sequencing data available	1857	458	3159	430	1551	7455
Number of patients with a mutation in target gene(s)	1640	389	2523	411	1417	6380
Number of patients without a mutation in target gene(s)	217	69	636	19	134	1075
Number of patients without a mutation in target gene(s) with a unique patient ID	217	45	529	19	52	862
Number of patients without a mutation in target gene(s) without a unique patient ID	0	24	107	0	82	213

## Sheet: Genomic data for cBioPortal 
Unique Patient ID	Gene Symbol	Coding Position	Amino Acid Change	Mutation Type	Disease Group	Subtype	Study ID	Study PMID
100901	ASXL1	c.1271_1272	Y425fs	frame_shift_del	MDS		1	23443460
100901	PHF6	c.820	R274*	nonsense	MDS		1	23443460
100901	U2AF1	c.470	Q157P	missense	MDS		1	23443460
116960	RUNX1	c.592	D198N	missense	MDS		1	23443460
127804	TET2	c.1578	D527fs	frame_shift_del	MDS		1	23443460
127804	ZRSR2	c.978	C326*	nonsense	MDS		1	23443460
131153	TP53	c.695	I232T	missense	MDS		1	23443460
137250	U2AF1	c.101	S34Y	missense	MDS		1	23443460
137404	TP53	c.814	V272L	missense	MDS		1	23443460
137404	TP53	c.1179_1176	D393fs	frame_shift_del	MDS		1	23443460
173005	TP53	c.659	Y220C	missense	MDS		1	23443460
176267	DNMT3A	c.2645	R882H	missense	MDS		1	23443460
176267	TP53	c.524	R175H	missense	MDS		1	23443460
176267	TP53	c.800	R267Q	missense	MDS		1	23443460
178647	BCOR	c.3898_3899	C1300fs	frame_shift_ins	sAML		1	23443460
178647	BCOR	c.3889_3890	D1297fs	frame_shift_ins	sAML		1	23443460
178647	DNMT3A	c.2598-1	e22-1	splice_site	sAML		1	23443460
178647	NRAS	c.181	Q61K	missense	sAML		1	23443460
178647	STAG2	c.3783+1	e32+1	splice_site	sAML		1	23443460
178647	U2AF1	c.101	S34F	missense	sAML		1	23443460
184874	SF3B1	c.2098	K700E	missense	MDS		1	23443460
189474	IDH1	c.395	R132H	missense	MDS		1	23443460
189474	ASXL1	c.2122	Q708*	nonsense	MDS		1	23443460
201641	TP53	c.824	C275Y	missense	MDS		1	23443460
207282	DNMT3A	c.2141	S714C	missense	MDS	RAEB	1	23443460
207282	TET2	c.1764	I589fs	frame_shift_del	MDS	RAEB	1	23443460
222841	TP53	c.713	C238Y	missense	MDS		1	23443460
266395	U2AF1	c.101	S34F	missense	MDS	RAEB	1	23443460
298273	NPM1	c.859_860	W288fs	frame_shift_ins	MDS	RAEB	1	23443460
300813	U2AF1	c.101	S34F	missense	MDS	RA	1	23443460
312519	ETV6	c.459_460	E153fs	frame_shift_ins	MDS		1	23443460
315529	TP53	c.519_518	R174fs	frame_shift_ins	MDS		1	23443460
317598	DNMT3A	c.2645	R882H	missense	MDS		1	23443460
317598	TET2	c.1686_1687	I563fs	frame_shift_ins	MDS		1	23443460
319179	DNMT3A	c.2711	P904L	missense	MDS		1	23443460
319179	RUNX1	c.592	D198N	missense	MDS		1	23443460
321864	U2AF1	c.101	S34F	missense	MDS		1	23443460
335224	TP53	c.695	I232T	missense	MDS		1	23443460
337081	IDH2	c.419	R140Q	missense	MDS		1	23443460
337081	RUNX1	c.507_506	G170fs	frame_shift_ins	MDS		1	23443460
337081	DNMT3A	c.1966	Q656*	nonsense	MDS		1	23443460
342760	EZH2	c.1703	K568T	missense	MDS		1	23443460
342760	TET2	c.1588	Q530*	nonsense	MDS		1	23443460
343306	TP53	c.733	G245S	missense	MDS		1	23443460
346313	NRAS	c.38	G13D	missense	MDS		1	23443460
346313	SF3B1	c.1998	K666N	missense	MDS		1	23443460
346313	WT1	c.1385	R462Q	missense	MDS		1	23443460
346313	STAG2	c.288+1_288+1	e3+1	splice_site_ins	MDS		1	23443460
346313	NPM1	c.861_862	W287fs	frame_shift_ins	MDS		1	23443460
369682	TP53	c.431	Q144P	missense	MDS		1	23443460
369682	TP53	c.646	V216M	missense	MDS		1	23443460
379929	DNMT3A	c.2210	L737R	missense	MDS		1	23443460
379929	DNMT3A	c.2711	P904L	missense	MDS		1	23443460
379929	NPM1	c.859_860	W288fs	frame_shift_ins	MDS		1	23443460
391828	SF3B1	c.2098	K700E	missense	MDS		1	23443460
391828	NF1	c.1278	W426*	nonsense	MDS		1	23443460
392543	DNMT3A	c.2644	R882C	missense	MDS		1	23443460
395621	SF3B1	c.2342	D781G	missense	MDS		1	23443460
431137	TP53	c.818	R273H	missense	MDS		1	23443460
457721	DNMT3A	c.2645	R882H	missense	MDS		1	23443460
457721	EZH2	c.2035	V679L	missense	MDS		1	23443460
457721	TET2	c.1561	K522fs	frame_shift_del	MDS		1	23443460
457721	TET2	c.299_300	K101fs	frame_shift_ins	MDS		1	23443460
461282	ZRSR2	c.343	Q115K	missense	MDS	RAEB	1	23443460
463763	U2AF1	c.101	S34F	missense	MDS		1	23443460
497942	SF3B1	c.2230	A744P	missense	MDS		1	23443460
497942	STAG2	c.3133	R1045*	nonsense	MDS		1	23443460
511734	TET2	c.1082_1083	Q361fs	frame_shift_del	MDS		1	23443460
530722	IDH2	c.419	R140Q	missense	MDS		1	23443460
530722	NRAS	c.176	A59D	missense	MDS		1	23443460
530722	STAG2	c.1459_1460	A488fs	frame_shift_del	MDS		1	23443460
530724	U2AF1	c.470	Q157P	missense	MDS		1	23443460
537426	TET2	c.929	A310fs	frame_shift_del	MDS		1	23443460
538267	TP53	c.646	V216M	missense	MDS		1	23443460
543465	EZH2	c.392	I131N	missense	MDS	RAEB	1	23443460
547403	CBL	c.445	R149*	nonsense	MDS		1	23443460
554562	TET2	c.4108	G1370R	missense	MDS	RA	1	23443460
554562	TET2	c.3965	L1322P	missense	MDS	RA	1	23443460
554562	CBL	c.1618	R540*	nonsense	MDS	RA	1	23443460
557468	IDH2	c.419	R140Q	missense	MDS		1	23443460
557468	NRAS	c.179	G60E	missense	MDS		1	23443460
557468	PHF6	c.941	I314T	missense	MDS		1	23443460
557468	ZRSR2	c.817	Q273*	nonsense	MDS		1	23443460
558896	TP53	c.427	V143M	missense	MDS		1	23443460
558896	TP53	c.488	Y163C	missense	MDS		1	23443460
571656	BCOR	c.3657	E1220fs	frame_shift_del	MDS		1	23443460
571656	EZH2	c.347_346	L116fs	frame_shift_ins	MDS		1	23443460
571656	U2AF1	c.101	S34F	missense	MDS		1	23443460
574490	JAK2	c.1849	V617F	missense	MDS		1	23443460
577164	TP53	c.376-1	e4-1	splice_site	MDS		1	23443460
597501	NF1	c.6853_6854	Y2285fs	frame_shift_ins	MDS		1	23443460
610184	TP53	c.814	V272M	missense	MDS	RA	1	23443460
631698	TET2	c.4075	R1359C	missense	MDS		1	23443460
631698	EZH2	c.1203_1200	E401fs	frame_shift_del	MDS		1	23443460
631698	RUNX1	c.509_508	G170fs	frame_shift_ins	MDS		1	23443460
631698	STAG2	c.1840	R614*	nonsense	MDS		1	23443460
631698	ZRSR2	c.872	W291*	nonsense	MDS		1	23443460
641987	TP53	c.659	Y220S	missense	MDS		1	23443460
667720	GATA2	c.1327	L443I	missense	MDS	RAEB	1	23443460
667720	RUNX1	c.506	G170fs	frame_shift_ins	MDS	RAEB	1	23443460
667720	RUNX1	c.371_370	V124fs	frame_shift_ins	MDS	RAEB	1	23443460
672525	SF3B1	c.1873	R625C	missense	MDS		1	23443460
672525	NF1	c.730+2	e7+2	splice_site	MDS		1	23443460
689147	TP53	c.818	R273H	missense	sAML		1	23443460
690100	TP53	c.814	V272M	missense	MDS		1	23443460
690100	BCOR	c.20_19	L7fs	frame_shift_ins	MDS		1	23443460
690100	DNMT3A	c.1264_1265	L422*	frame_shift_ins	MDS		1	23443460
690100	NRAS	c.511_510	L170fs	frame_shift_ins	MDS		1	23443460
693881	TP53	c.711	M237I	missense	MDS		1	23443460
693881	TP53	c.672+1	e5+1	splice_site	MDS		1	23443460
696026	EZH2	c.745	E249K	missense	MDS		1	23443460
696026	EZH2	c.2069	R690H	missense	MDS		1	23443460
696026	STAG2	c.1239_1240	Y413fs	frame_shift_ins	MDS		1	23443460
696026	ASXL1	c.2893	R965*	nonsense	MDS		1	23443460
697296	EZH2	c.398	Y133C	missense	MDS		1	23443460
697296	TET2	c.210-1	e2-1	splice_site	MDS		1	23443460
697296	TET2	c.210-2	e2-2	splice_site	MDS		1	23443460
697296	TET2	c.418	K140*	nonsense	MDS		1	23443460
698840	TP53	c.734	G245D	missense	MDS		1	23443460
705782	NF1	c.2026_2027	I679fs	frame_shift_ins	MDS		1	23443460
705782	WT1	c.1145_1144	A382fs	frame_shift_ins	MDS		1	23443460
732776	NRAS	c.35	G12D	missense	MDS		1	23443460
732776	NPM1	c.859_860	W288fs	frame_shift_ins	MDS		1	23443460
759134	IDH2	c.419	R140Q	missense	sAML		1	23443460
791334	ASXL1	c.2422	P808fs	frame_shift_del	MDS		1	23443460
791334	FLT3	c.2935_2934	E978fs	frame_shift_del	MDS		1	23443460
804059	TET2	c.191	R64L	missense	MDS		1	23443460
804059	TP53	c.533_532	H178fs	frame_shift_ins	MDS		1	23443460
809605	GATA2	c.600_599	S201fs	frame_shift_ins	MDS		1	23443460
827584	RUNX1	c.458	N153I	missense	MDS		1	23443460
827584	SRSF2	c.284	P95L	missense	MDS		1	23443460
827584	NF1	c.2026_2027	I679fs	frame_shift_ins	MDS		1	23443460
827584	RUNX1	c.473_472	F158fs	frame_shift_ins	MDS		1	23443460
827584	STAG2	c.3724	R1242*	nonsense	MDS		1	23443460
838538	BCOR	c.4071+1	e8+1	splice_site	sAML		1	23443460
838538	PTPN11	c.182	D61V	missense	sAML		1	23443460
838538	TP53	c.733	G245S	missense	sAML		1	23443460
843623	DNMT3A	c.1627	G543C	missense	MDS		1	23443460
843623	RUNX1	c.601	R201*	nonsense	MDS		1	23443460
843623	U2AF1	c.101	S34F	missense	MDS		1	23443460
845446	CBL	c.1186	C396R	missense	MDS		1	23443460
845446	BCOR	c.3052-2	e5-2	splice_site	MDS		1	23443460
845446	STAG2	c.1304+2	e12+2	splice_site	MDS		1	23443460
845446	RUNX1	c.422_421	S141fs	frame_shift_del	MDS		1	23443460
846155	RUNX1	c.404	G135D	missense	MDS		1	23443460
846155	STAG2	c.3245	V1084fs	frame_shift_del	MDS		1	23443460
846155	TET2	c.1983_1984	V663fs	frame_shift_ins	MDS		1	23443460
846155	TET2	c.2504	S835*	nonsense	MDS		1	23443460
854400	ETV6	c.1172	Y391C	missense	MDS		1	23443460
854400	EZH2	c.1871	S624Y	missense	MDS		1	23443460
854400	NRAS	c.38	G13D	missense	MDS		1	23443460
855934	PHF6	c.126_127	H42fs	frame_shift_ins	MDS		1	23443460
855934	TET2	c.2746	Q916*	nonsense	MDS		1	23443460
855934	U2AF1	c.470	Q157P	missense	MDS		1	23443460
859640	IDH2	c.436_435	T145fs	frame_shift_ins	MDS	RA	1	23443460
879047	NF1	c.5498	L1833P	missense	MDS		1	23443460
879047	SF3B1	c.2098	K700E	missense	MDS		1	23443460
879047	TET2	c.390	L131fs	frame_shift_del	MDS		1	23443460
882525	TP53	c.710	M237K	missense	MDS		1	23443460
889352	TP53	c.472	R158G	missense	MDS		1	23443460
917011	DNMT3A	c.1903	R635W	missense	MDS		1	23443460
917011	TET2	c.1960	Q654*	nonsense	MDS		1	23443460
917011	U2AF1	c.101	S34F	missense	MDS		1	23443460
936943	BCOR	c.20_19	L7fs	frame_shift_ins	MDS		1	23443460
937954	ASXL1	c.1926_1927	G645fs	frame_shift_ins	MDS		1	23443460
937954	BCOR	c.3489_3488	R1164fs	frame_shift_ins	MDS		1	23443460
937954	U2AF1	c.101	S34Y	missense	MDS		1	23443460
944541	NF1	c.7695_7696	K2567fs	frame_shift_ins	MDS		1	23443460
947519	CBL	c.1027	R343*	nonsense	MDS		1	23443460
947519	U2AF1	c.470	Q157R	missense	MDS		1	23443460
947519	U2AF1	c.101	S34F	missense	MDS		1	23443460
949197	TP53	c.818	R273H	missense	MDS		1	23443460
958595	DNMT3A	c.2645	R882H	missense	MDS		1	23443460
973424	IDH1	c.394	R132G	missense	MDS		1	23443460
975079	CBL	c.1268	I423N	missense	MDS		1	23443460
975079	NF1	c.7695_7696	K2567fs	frame_shift_ins	MDS		1	23443460
975079	DNMT3A	c.709	Q237*	nonsense	MDS		1	23443460
975079	TET2	c.1444	Q482*	nonsense	MDS		1	23443460
983677	BCOR	c.2515_2514	K838fs	frame_shift_ins	MDS	RAEB	1	23443460
983677	NF1	c.4070_4071	Q1360fs	frame_shift_ins	MDS	RAEB	1	23443460
983677	TP53	c.743	R248Q	missense	MDS	RAEB	1	23443460
987089	TP53	c.841	D281N	missense	MDS		1	23443460
987089	NF1	c.2026_2027	I679fs	frame_shift_ins	MDS		1	23443460
988428	DNMT3A	c.2312	R771L	missense	MDS		1	23443460
988428	EZH2	c.648	K217fs	frame_shift_del	MDS		1	23443460
989382	ETV6	c.1118	P373L	missense	sAML		1	23443460
989739	DNMT3A	c.2309	S770W	missense	MDS		1	23443460
989739	BCOR	c.1558_1557	N519fs	frame_shift_ins	MDS		1	23443460
989739	U2AF1	c.101	S34F	missense	MDS		1	23443460
994096	ASXL1	c.1504_1505	S503fs	frame_shift_ins	MDS		1	23443460
999103	DNMT3A	c.994	G332R	missense	MDS		1	23443460
01-13	NRAS	c.37	G13R	missense	MDS		1	23443460
01-13	SF3B1	c.2098	K700E	missense	MDS		1	23443460
01-13	GATA2	c.1282_1281	F427fs	frame_shift_ins	MDS		1	23443460
02-21	SF3B1	c.2098	K700E	missense	MDS		1	23443460
02-28	ASXL1	c.2182	E728*	nonsense	MDS		1	23443460
02-30	TP53	c.659	Y220C	missense	MDS		1	23443460
02-86	PHF6	c.953_954	R319fs	frame_shift_ins	MDS		1	23443460
02-86	ASXL1	c.2113	E705*	nonsense	MDS		1	23443460
02-86	U2AF1	c.101	S34F	missense	MDS		1	23443460
104	DNMT3A	c.2644	R882C	missense	AML	M4	2	23634996
104	IDH1	c.395	R132H	missense	AML	M4	2	23634996
104	NPM1	c.804_805	I268fs	frame_shift_ins	AML	M4	2	23634996
104	NPM1	c.805_806	N270fs	frame_shift_ins	AML	M4	2	23634996
104	PTPN11	c.181	D61N	missense	AML	M4	2	23634996
201	PHF6	c.415	E139*	nonsense	AML	M3	2	23634996
203	IDH2	c.419	R140Q	missense	AML	M0	2	23634996
203	RUNX1	c.601	R201*	nonsense	AML	M0	2	23634996
203	RUNX1	c.423_422	A142fs	frame_shift_ins	AML	M0	2	23634996
203	SRSF2	c.C284A	P95L	Missense	AML	M0	2	23634996
245	ASXL1	c.2212	G738fs	frame_shift_del	AML	M1	2	23634996
245	IDH2	c.419	R140Q	missense	AML	M1	2	23634996
245	RUNX1	c.506_501	SG167in_frame_del	in_frame_del	AML	M1	2	23634996
245	SRSF2	c.284_307del	P95-102del	frame_shift	AML	M1	2	23634996
269	CEBPA	c.953_952	318in_frame_insM	in_frame_ins	AML	M2	2	23634996
269	NRAS	c.38	G13D	missense	AML	M2	2	23634996
287	DNMT3A	c.2645	R882H	missense	AML	M2	2	23634996
287	NPM1	c.859_860	W288fs	frame_shift_ins	AML	M2	2	23634996
295	IDH2	c.419	R140Q	missense	AML	M2	2	23634996
295	NPM1	c.859_860	W288fs	frame_shift_ins	AML	M2	2	23634996
295	SRSF2	c.C284G	P95H	Missense	AML	M2	2	23634996
296	DNMT3A	c.2645	R882H	missense	AML	M4	2	23634996
296	FLT3	c.2503	D835Y	missense	AML	M4	2	23634996
296	NPM1	c.863_864	W288fs	frame_shift_ins	AML	M4	2	23634996
100232	DNMT3A	c.2644	R882C	missense	AML	M2	2	23634996
100232	TET2	c.52	R18*	nonsense	AML	M2	2	23634996
100232	TP53	c.949	Q317*	nonsense	AML	M2	2	23634996
100232	TP53	c.423	C141W	missense	AML	M2	2	23634996
103342	CBL	c.2190	T730	silent	AML	M2	2	23634996
103342	NRAS	c.182	Q61P	missense	AML	M2	2	23634996
103342	RUNX1	c.601	R201*	nonsense	AML	M2	2	23634996
103342	STAG2	c.3133	R1045*	nonsense	AML	M2	2	23634996
103342	TET2	c.450+2_450+1	e3+2	splice_site_ins	AML	M2	2	23634996
103342	TET2	c.952	R318*	nonsense	AML	M2	2	23634996
103342	SRSF2	c.C284G	P95H	Missense	AML	M2	2	23634996
104851	FLT3	c.1800_1799	601in_frame_insSSDNEYFYVDFREYEYD	in_frame_ins	AML	M2	2	23634996
104851	NPM1	c.861_862	W287fs	frame_shift_ins	AML	M2	2	23634996
113971	DNMT3A	c.1769	G590fs	frame_shift_del	AML	M2	2	23634996
113971	IDH2	c.419	R140Q	missense	AML	M2	2	23634996
113971	KRAS	c.436	A146T	missense	AML	M2	2	23634996
123172	FLT3	c.2503	D835Y	missense	AML	M1	2	23634996
123172	NPM1	c.863_864	W288fs	frame_shift_ins	AML	M1	2	23634996
123172	PTPN11	c.1530	Q510H	missense	AML	M1	2	23634996
123804	FLT3	c.2503	D835H	missense	AML	M5	2	23634996
128392	TP53	c.1009	R337C	missense	AML	M0	2	23634996
141273	DNMT3A	c.1453	Q485*	nonsense	AML	M2	2	23634996
141273	FLT3	c.1803_1802	602in_frame_insQMGVSKRKFRVWRI*I*S	in_frame_ins	AML	M2	2	23634996
141273	NPM1	c.860_861	W288fs	frame_shift_ins	AML	M2	2	23634996
142074	DNMT3A	c.2645	R882H	missense	AML	M4	2	23634996
142074	FLT3	c.1718_1717	574in_frame_insKPATDGTGDRLLR**VLLR*FQRK	in_frame_ins	AML	M4	2	23634996
142074	NPM1	c.863_864	W288fs	frame_shift_ins	AML	M4	2	23634996
142074	TET2	c.353	P118fs	frame_shift_del	AML	M4	2	23634996
146218	FLT3	c.1798_1781	595in_frame_insPPTP	in_frame_ins	AML	M1	2	23634996
146218	NRAS	c.181	Q61K	missense	AML	M1	2	23634996
147796	TP53	c.527	C176Y	missense	AML	M4	2	23634996
150288	FLT3	c.1794_1793	599in_frame_insMVQVTGSSDNEYFYVDFREYE	in_frame_ins	AML	M1	2	23634996
150288	NPM1	c.859_860	W288fs	frame_shift_ins	AML	M1	2	23634996
150288	PTPN11	c.1529	Q510L	missense	AML	M1	2	23634996
150288	STAG2	c.1416+1	e13+1	splice_site	AML	M1	2	23634996
150951	FLT3	c.2505	D835E	missense	AML	M0	2	23634996
179223	NPM1	c.863_864	W288fs	frame_shift_ins	AML	M2	2	23634996
179223	PTPN11	c.1504	S502P	missense	AML	M2	2	23634996
179223	STAG2	c.1840	R614*	nonsense	AML	M2	2	23634996
180168	DNMT3A	c.2645	R882H	missense	AML	M5	2	23634996
180168	TET2	c.2638	H880fs	frame_shift_del	AML	M5	2	23634996
180168	TET2	c.2638	H880fs	frame_shift_del	AML	M5	2	23634996
186481	DNMT3A	c.2644	R882C	missense	AML	M4	2	23634996
186481	FLT3	c.2503	D835Y	missense	AML	M4	2	23634996
186481	NPM1	c.859_860	W288fs	frame_shift_ins	AML	M4	2	23634996
186481	NRAS	c.38	G13D	missense	AML	M4	2	23634996
193139	FLT3	c.1796_1795	599in_frame_insSGSSDNEYFYVDFREYE	in_frame_ins	AML	M2	2	23634996
193139	NPM1	c.788	K263R	missense	AML	M2	2	23634996
202127	FLT3	c.1801_1800	600in_frame_insFREYEYD	in_frame_ins	AML	M3	2	23634996
208027	DNMT3A	c.2409	R803S	missense	AML	M2	2	23634996
208027	FLT3	c.2503	D835Y	missense	AML	M2	2	23634996
208027	NPM1	c.859_860	W288fs	frame_shift_ins	AML	M2	2	23634996
224143	DNMT3A	c.2726	F909C	missense	AML	M1	2	23634996
224143	FLT3		in_frame_ins	in_frame_ins	AML	M1	2	23634996
224143	NPM1	c.863_864	W288fs	frame_shift_ins	AML	M1	2	23634996
225373	IDH1	c.394	R132C	missense	AML	M2	2	23634996
237983	CEBPA	c.898	R300C	missense	AML	M2	2	23634996
237983	IDH2	c.419	R140Q	missense	AML	M2	2	23634996
237983	WT1	c.1384	R462W	missense	AML	M2	2	23634996
245450	U2AF1	c.101	S34F	missense	AML	M4	2	23634996
245450	DNMT3A	c.2185	R729W	missense	AML	M4	2	23634996
245450	PHF6	c.65_66	N23fs	frame_shift_ins	AML	M4	2	23634996
245450	RUNX1	c.485	R162K	missense	AML	M4	2	23634996
246634	U2AF1	c.101	S34F	missense	AML	M4	2	23634996
246634	BCOR	c.2515_2514	K838fs	frame_shift_ins	AML	M4	2	23634996
246634	DNMT3A	c.2222	A741V	missense	AML	M4	2	23634996
246634	DNMT3A	c.1429	E477*	nonsense	AML	M4	2	23634996
246634	NRAS	c.183	Q61H	missense	AML	M4	2	23634996
254137	FLT3	c.1793_1792	598in_frame_insAGSSDNEYFYVDFREY	in_frame_ins	AML	M2	2	23634996
254137	NPM1	c.863_864	W288fs	frame_shift_ins	AML	M2	2	23634996
255108	FLT3	c.1816_1815	605in_frame_insSSDNEYFYVDFREYEYDLKWEF	in_frame_ins	AML	M0	2	23634996
255108	NPM1	c.863_864	W288fs	frame_shift_ins	AML	M0	2	23634996
255108	STAG2	c.2265+2	e21+2	splice_site	AML	M0	2	23634996
255108	WT1	c.1249+1	e7+1	splice_site	AML	M0	2	23634996
255421	FLT3	c.1802_1801	602in_frame_insQRI*I*F	in_frame_ins	AML	M1	2	23634996
258135	CBL	c.1096-1	e8-1	splice_site	AML	M2	2	23634996
258135	PTPN11	c.215	A72V	missense	AML	M2	2	23634996
263578	KIT	c.1253	Y418S	missense	AML	M2	2	23634996
269542	TP53	c.668_667	P223fs	frame_shift_ins	AML	M0	2	23634996
273919	CEBPA	c.931_930	310in_frame_insW	in_frame_ins	AML	M2	2	23634996
273919	CEBPA	c.175	E59*	nonsense	AML	M2	2	23634996
274429	U2AF1	c.470	Q157P	missense	AML	M1	2	23634996
274429	ASXL1	c.2197	Q733*	nonsense	AML	M1	2	23634996
274429	IDH1	c.394	R132C	missense	AML	M1	2	23634996
274429	IDH2	c.515	R172K	missense	AML	M1	2	23634996
274429	RUNX1	c.368_367	D123fs	frame_shift_ins	AML	M1	2	23634996
275382	DNMT3A	c.1668-1	e14-1	splice_site	AML	M0	2	23634996
275382	IDH1	c.394	R132C	missense	AML	M0	2	23634996
275382	TET2	c.944	Q317fs	frame_shift_del	AML	M0	2	23634996
275786	FLT3	c.1795_1794	598in_frame_insVAYVDFREYE	in_frame_ins	AML	M2	2	23634996
290344	DNMT3A	c.2644	R882C	missense	AML	M4	2	23634996
294154	DNMT3A	c.2207	R736H	missense	AML	M5	2	23634996
294154	NPM1	c.863_864	W288fs	frame_shift_ins	AML	M5	2	23634996
296361	DNMT3A	c.2645	R882H	missense	AML	M5	2	23634996
296361	FLT3		in_frame_ins	in_frame_ins	AML	M5	2	23634996
296361	NPM1	c.863_864	W288fs	frame_shift_ins	AML	M5	2	23634996
303642	DNMT3A	c.1490	C497Y	missense	AML	M1	2	23634996
303642	IDH1	c.394	R132C	missense	AML	M1	2	23634996
303642	NPM1	c.859_860	W288fs	frame_shift_ins	AML	M1	2	23634996
303642	WT1	c.1393	H465Y	missense	AML	M1	2	23634996
303818	KRAS	c.108	I36M	missense	AML	M0	2	23634996
303818	SRSF2	c.C284G	P95H	Missense	AML	M0	2	23634996
311636	IDH2	c.419	R140Q	missense	AML	M4	2	23634996
311636	KRAS	c.183	Q61H	missense	AML	M4	2	23634996
311636	NPM1	c.859_860	W288fs	frame_shift_ins	AML	M4	2	23634996
311636	SRSF2	c.C284G	P95H	Missense	AML	M4	2	23634996
319955	TET2	c.1441	Q481*	nonsense	AML	M2	2	23634996
319955	TET2	c.2014	H672fs	frame_shift_del	AML	M2	2	23634996
322110	FLT3	c.1812_1811	605in_frame_insYDLKWE	in_frame_ins	AML	M1	2	23634996
322110	IDH2	c.419	R140Q	missense	AML	M1	2	23634996
322110	NPM1	c.859_860	W288fs	frame_shift_ins	AML	M1	2	23634996
325028	NF1	c.3827	R1276Q	missense	AML	M2	2	23634996
326772	TP53	c.643	S215G	missense	AML	M2	2	23634996
326772	TP53	c.516	V173fs	frame_shift_del	AML	M2	2	23634996
327733	IDH1	c.394	R132C	missense	AML	M1	2	23634996
327733	NPM1	c.863_864	W288fs	frame_shift_ins	AML	M1	2	23634996
327929	TP53	c.838	R280G	missense	AML	M6	2	23634996
327929	TP53	c.673-1	e6-1	splice_site	AML	M6	2	23634996
329614	FLT3	c.1806_1805	602in_frame_insNVDFREYEYDL	in_frame_ins	AML	M1	2	23634996
329614	NPM1	c.863_864	W288fs	frame_shift_ins	AML	M1	2	23634996
329614	TET2	c.822	N275fs	frame_shift_del	AML	M1	2	23634996
329614	TET2	c.822	N275fs	frame_shift_del	AML	M1	2	23634996
329614	TET2	c.52	R18*	nonsense	AML	M1	2	23634996
332131	CEBPA	c.330_329	A111fs	frame_shift_ins	AML	M1	2	23634996
332131	FLT3	c.1805_1804	602in_frame_insREYEYDL	in_frame_ins	AML	M1	2	23634996
335640	DNMT3A	c.2644	R882C	missense	AML	M5	2	23634996
335640	FLT3	c.2503	D835Y	missense	AML	M5	2	23634996
335640	NPM1	c.863_864	W288fs	frame_shift_ins	AML	M5	2	23634996
344551	WT1	c.1130_1129	T377fs	frame_shift_ins	AML	M3	2	23634996
345701	KIT	c.2446	D816Y	missense	AML	M1	2	23634996
346190	DNMT3A	c.2645	R882P	missense	AML	M4	2	23634996
346190	FLT3	c.1814_1813	605in_frame_insSPRGGNEYFYVDFREYEYDLKWE	in_frame_ins	AML	M4	2	23634996
346190	TET2	c.547_548	A183fs	frame_shift_ins	AML	M4	2	23634996
346190	TET2	c.723	K241fs	frame_shift_del	AML	M4	2	23634996
348685	FLT3	c.1794_1793	YDL599in_frame_insIR*	in_frame_ins	AML	M4	2	23634996
369065	DNMT3A	c.2330_2321	E774fs	frame_shift_del	AML	M0	2	23634996
375182	DNMT3A	c.2645	R882H	missense	AML	M5	2	23634996
375182	FLT3	c.1801_1800	600in_frame_insNEYFYVDFREYEYD	in_frame_ins	AML	M5	2	23634996
375182	GATA2	c.1154	P385L	missense	AML	M5	2	23634996
375182	NPM1	c.859_860	W288fs	frame_shift_ins	AML	M5	2	23634996
387919	FLT3	c.2503	D835Y	missense	AML	M1	2	23634996
387919	IDH1	c.394	R132C	missense	AML	M1	2	23634996
399253	DNMT3A	c.2645	R882H	missense	AML	M4	2	23634996
399253	SRSF2	c.C284G	P95R	Missense	AML	M4	2	23634996
400220	BCOR	c.741	P248fs	frame_shift_del	AML	M4	2	23634996
400220	FLT3	c.1798_1797	599in_frame_insPAPQIMSTSTLISENMNIA	in_frame_ins	AML	M4	2	23634996
400220	RUNX1	c.338	P113L	missense	AML	M4	2	23634996
400220	WT1	c.1340-1	e9-1	splice_site	AML	M4	2	23634996
400830	U2AF1	c.101	S34Y	missense	AML	M2	2	23634996
405655	FLT3	c.1781_1780	594in_frame_insSPEDNEYFYVD	in_frame_ins	AML	M0	2	23634996
407992	FLT3	c.2505	D835E	missense	AML	M4	2	23634996
412761	NPM1	c.863_864	W288fs	frame_shift_ins	AML	M5	2	23634996
415172	KRAS	c.35	G12D	missense	AML	M0	2	23634996
415172	SF3B1	c.2098	K700E	missense	AML	M0	2	23634996
418499	FLT3	c.1789_1788	596in_frame_insDNEYFYVDFRE	in_frame_ins	AML	M4	2	23634996
418499	NPM1	c.859_860	W288fs	frame_shift_ins	AML	M4	2	23634996
426980	IDH2	c.419	R140L	missense	AML	M2	2	23634996
426980	SRSF2	c.284_307del	P95-102del	frame_shift	AML	M2	2	23634996
427366	NPM1	c.859_860	W288fs	frame_shift_ins	AML	M5	2	23634996
431799	DNMT3A	c.2645	R882H	missense	AML	M1	2	23634996
431799	IDH1	c.395	R132H	missense	AML	M1	2	23634996
431799	NPM1	c.859_860	W288fs	frame_shift_ins	AML	M1	2	23634996
431799	PTPN11	c.211	F71L	missense	AML	M1	2	23634996
432398	NRAS	c.183	Q61H	missense	AML	M2	2	23634996
432398	TP53	c.375	T125	silent	AML	M2	2	23634996
433325	CEBPA	c.1027	R343fs	frame_shift_del	AML	M2	2	23634996
433325	DNMT3A	c.1543	Q515*	nonsense	AML	M2	2	23634996
433325	NPM1	c.859_860	W288fs	frame_shift_ins	AML	M2	2	23634996
433325	NRAS	c.38	G13D	missense	AML	M2	2	23634996
433325	PTPN11	c.1633	I545L	missense	AML	M2	2	23634996
433325	WT1	c.1144_1143	A381fs	frame_shift_ins	AML	M2	2	23634996
434640	PTPN11	c.179	G60V	missense	AML	M0	2	23634996
434640	TP53	c.577	H193Y	missense	AML	M0	2	23634996
440422	ASXL1	c.4243	R1415*	nonsense	AML	M0	2	23634996
440422	IDH2	c.419	R140Q	missense	AML	M0	2	23634996
440422	RUNX1	c.509-2	e5-2	splice_site	AML	M0	2	23634996
445045	U2AF1	c.101	S34F	missense	AML	M2	2	23634996
445045	TET2	c.466_467	R156fs	frame_shift_del	AML	M2	2	23634996
445045	TET2	c.2008	H670Y	missense	AML	M2	2	23634996
447649	FLT3	c.1808_1807	603in_frame_insYEYDLK	in_frame_ins	AML	M3	2	23634996
452198	DNMT3A	c.2645	R882H	missense	AML	M5	2	23634996
452198	FLT3	c.2503	D835H	missense	AML	M5	2	23634996
452198	IDH1	c.395	R132H	missense	AML	M5	2	23634996
452198	NPM1	c.859_860	W288fs	frame_shift_ins	AML	M5	2	23634996
456892	DNMT3A	c.1513	E505*	nonsense	AML	M4	2	23634996
456892	NPM1	c.863_864	W288fs	frame_shift_ins	AML	M4	2	23634996
456892	NRAS	c.38	G13D	missense	AML	M4	2	23634996
470690	RUNX1	c.484	R162G	missense	AML	M4	2	23634996
470690	SRSF2	c.C284A	P95L	Missense	AML	M4	2	23634996
478908	FLT3	c.1801_1800	600in_frame_insFREYEYD	in_frame_ins	AML	M3	2	23634996
498463	DNMT3A	c.2153	P718L	missense	AML	M1	2	23634996
498463	EZH2	c.2069	R690H	missense	AML	M1	2	23634996
498463	IDH1	c.394	R132C	missense	AML	M1	2	23634996
498463	NRAS	c.35	G12D	missense	AML	M1	2	23634996
499294	KIT	c.1253_1254	419in_frame_insFF	in_frame_ins	AML	M4	2	23634996
499862	NRAS	c.182	Q61R	missense	AML	M4	2	23634996
499862	TET2	c.1648	R550*	nonsense	AML	M4	2	23634996
499862	TET2	c.2870_2871	Q958fs	frame_shift_ins	AML	M4	2	23634996
507202	FLT3	c.2503	D835Y	missense	AML	M4	2	23634996
507202	NPM1	c.862_863	W288fs	frame_shift_ins	AML	M4	2	23634996
509754	IDH1	c.394	R132S	missense	AML	M1	2	23634996
509754	NPM1	c.863_864	W288fs	frame_shift_ins	AML	M1	2	23634996
514066	KIT	c.2447	D816V	missense	AML	M1	2	23634996
514066	TET2	c.375	F125fs	frame_shift_del	AML	M1	2	23634996
529205	FLT3	c.1801_1800	600in_frame_insFREYEYD	in_frame_ins	AML	M3	2	23634996
530962	DNMT3A	c.943	M315fs	frame_shift_del	AML	M7	2	23634996
530962	TP53	c.1024	R342fs	frame_shift_del	AML	M7	2	23634996
530962	TP53	c.536	H179R	missense	AML	M7	2	23634996
545259	CEBPA	c.926_921	NVE307in_frame_delK	in_frame_del	AML	M1	2	23634996
545259	CEBPA	c.202_201	I68fs	frame_shift_del	AML	M1	2	23634996
548327	IDH1	c.394	R132G	missense	AML	M1	2	23634996
548327	NPM1	c.863_864	W288fs	frame_shift_ins	AML	M1	2	23634996
548327	SRSF2	c.C284A	P95L	Missense	AML	M1	2	23634996
553863	RUNX1	c.601	R201*	nonsense	AML	M0	2	23634996
569053	U2AF1	c.101	S34F	missense	AML	M6	2	23634996
569053	KIT	c.590	S197L	missense	AML	M6	2	23634996
569053	KIT	c.2447	D816V	missense	AML	M6	2	23634996
570755	FLT3		in_frame_ins	in_frame_ins	AML	M2	2	23634996
570755	WT1	c.1142_1141	S381fs	frame_shift_ins	AML	M2	2	23634996
573988	IDH2	c.419	R140Q	missense	AML	M4	2	23634996
573988	NPM1	c.859_860	W288fs	frame_shift_ins	AML	M4	2	23634996
578179	ASXL1	c.1720-1	e13-1	splice_site	AML	M1	2	23634996
578179	RUNX1	c.601	R201*	nonsense	AML	M1	2	23634996
578179	RUNX1	c.486	R162S	missense	AML	M1	2	23634996
593890	CEBPA	c.926_925	309in_frame_insV	in_frame_ins	AML	M2	2	23634996
593890	CEBPA	c.68	P23fs	frame_shift_del	AML	M2	2	23634996
594368	DNMT3A	c.2186	R729Q	missense	AML	M1	2	23634996
594368	DNMT3A	c.1851+2	e14+2	splice_site	AML	M1	2	23634996
594368	ETV6	c.1252	R418G	missense	AML	M1	2	23634996
594368	IDH2	c.419	R140Q	missense	AML	M1	2	23634996
595704	FLT3	c.1798_1797	DLKW599in_frame_insR*	in_frame_ins	AML	M4	2	23634996
605322	DNMT3A	c.2342	D781G	missense	AML	M1	2	23634996
605322	DNMT3A	c.958	R320*	nonsense	AML	M1	2	23634996
605322	FLT3	c.2516	D839G	missense	AML	M1	2	23634996
605322	IDH1	c.394	R132C	missense	AML	M1	2	23634996
605322	TET2	c.3343	P1115fs	frame_shift_del	AML	M1	2	23634996
605322	TET2	c.3343	P1115fs	frame_shift_del	AML	M1	2	23634996
605322	TET2	c.3344	P1115fs	frame_shift_del	AML	M1	2	23634996
605322	TET2	c.461	E154V	missense	AML	M1	2	23634996
606061	CEBPA	c.931_930	310in_frame_insKQNP	in_frame_ins	AML	M2	2	23634996
606061	CEBPA	c.131_130	A44fs	frame_shift_del	AML	M2	2	23634996
606061	CEBPA	c.130	A44P	missense	AML	M2	2	23634996
606061	TET2	c.327	K110fs	frame_shift_del	AML	M2	2	23634996
617776	FLT3	c.1783_1782	594in_frame_insGTGSSDNEYFYVDF	in_frame_ins	AML	M2	2	23634996
617776	WT1	c.1111_1110	V370fs	frame_shift_ins	AML	M2	2	23634996
617776	WT1	c.1107_1106	R370fs	frame_shift_ins	AML	M2	2	23634996
619751	KIT	c.1248	T417fs	frame_shift_del	AML	M4	2	23634996
619751	KIT	c.1252_1253	Y418fs	frame_shift_ins	AML	M4	2	23634996
619751	WT1	c.1143_1142	A382fs	frame_shift_ins	AML	M4	2	23634996
632729	DNMT3A	c.2644	R882C	missense	AML	M2	2	23634996
632729	FLT3	c.1837_1836	612in_frame_insQGFYVDFREYEYDLKWEFPRENLEF	in_frame_ins	AML	M2	2	23634996
632729	NPM1	c.859_860	W288fs	frame_shift_ins	AML	M2	2	23634996
633734	U2AF1	c.101	S34F	missense	AML	M1	2	23634996
635258	NPM1	c.859_860	W288fs	frame_shift_ins	AML	M5	2	23634996
635258	NRAS	c.38	G13D	missense	AML	M5	2	23634996
670224	NPM1	c.863_864	W288fs	frame_shift_ins	AML	M4	2	23634996
671473	NRAS	c.181	Q61K	missense	AML	M4	2	23634996
673778	ETV6	c.311_323	Y104fs	frame_shift_del	AML	M3	2	23634996
700717	RUNX1	c.445	A149P	missense	AML	M0	2	23634996
702808	DNMT3A	c.2645	R882H	missense	AML	M5	2	23634996
702808	KRAS	c.38	G13D	missense	AML	M5	2	23634996
702808	NPM1	c.863_864	W288fs	frame_shift_ins	AML	M5	2	23634996
708512	DNMT3A	c.2645	R882H	missense	AML	M4	2	23634996
708512	FLT3	c.2505	D835E	missense	AML	M4	2	23634996
708512	IDH1	c.395	R132H	missense	AML	M4	2	23634996
708512	KIT	c.2447	D816V	missense	AML	M4	2	23634996
708512	NPM1	c.863_864	W288fs	frame_shift_ins	AML	M4	2	23634996
709968	FLT3	c.1801_1800	600in_frame_insFREYEYD	in_frame_ins	AML	M3	2	23634996
721214	DNMT3A	c.2645	R882H	missense	AML	M1	2	23634996
721214	FLT3		in_frame_ins	in_frame_ins	AML	M1	2	23634996
721214	NPM1	c.859_860	W288fs	frame_shift_ins	AML	M1	2	23634996
723101	DNMT3A	c.2207	R736H	missense	AML	M1	2	23634996
723101	DNMT3A	c.1937	G646V	missense	AML	M1	2	23634996
723101	FLT3	c.1799_1798	600in_frame_insGTGS*DNEYFYVDFREYEY	in_frame_ins	AML	M1	2	23634996
723101	IDH2	c.419	R140Q	missense	AML	M1	2	23634996
724606	IDH2	c.419	R140Q	missense	AML	M2	2	23634996
724606	RUNX1	c.1280_1258	G420fs	frame_shift_del	AML	M2	2	23634996
724606	STAG2	c.3467+1	e29+1	splice_site	AML	M2	2	23634996
724606	SRSF2	c.284_307del	P95-R102del	frame_shift	AML	M2	2	23634996
729805	TP53	c.743	R248Q	missense	AML	M4	2	23634996
730817	DNMT3A	c.1845	E616fs	frame_shift_del	AML	M5	2	23634996
730817	FLT3	c.2503	D835Y	missense	AML	M5	2	23634996
730817	U2AF2	c.524_525	L178fs	frame_shift_ins	AML	M5	2	23634996
737451	DNMT3A	c.2645	R882H	missense	AML	M5	2	23634996
737451	NPM1	c.863_864	W288fs	frame_shift_ins	AML	M5	2	23634996
740266	DNMT3A	c.2645	R882H	missense	AML	M0	2	23634996
740266	IDH1	c.395	R132H	missense	AML	M0	2	23634996
740266	RUNX1	c.941_940	S314fs	frame_shift_del	AML	M0	2	23634996
753374	CBL	c.1100	Q367R	missense	AML	M2	2	23634996
753374	NPM1	c.863_864	W288fs	frame_shift_ins	AML	M2	2	23634996
753374	WT1	c.1206_1205	Y402fs	frame_shift_del	AML	M2	2	23634996
766126	IDH2	c.419	R140Q	missense	AML	M0	2	23634996
766126	RUNX1	c.958	R320*	nonsense	AML	M0	2	23634996
766126	SRSF2	c.284_307del	P95-102del	frame_shift	AML	M0	2	23634996
767969	KIT	c.2447	D816V	missense	AML	M1	2	23634996
804168	FLT3	c.1800_1799	600in_frame_insEYEYEYEY	in_frame_ins	AML	M1	2	23634996
804168	NPM1	c.863_864	W288fs	frame_shift_ins	AML	M1	2	23634996
804168	PHF6	c.725	C242Y	missense	AML	M1	2	23634996
804168	WT1	c.1143_1142	A382fs	frame_shift_ins	AML	M1	2	23634996
806794	TP53	c.817	R273C	missense	AML	M1	2	23634996
807615	DNMT3A	c.2645	R882H	missense	AML	M1	2	23634996
807615	FLT3	c.1788_1787	596in_frame_insDYVDFR	in_frame_ins	AML	M1	2	23634996
807615	NPM1	c.859_860	W288fs	frame_shift_ins	AML	M1	2	23634996
807970	IDH1	c.394	R132C	missense	AML	M1	2	23634996
807970	NPM1	c.863_864	W288fs	frame_shift_ins	AML	M1	2	23634996
807970	NRAS	c.35	G12D	missense	AML	M1	2	23634996
808642	FLT3	c.1793	598in_frame_insDEYFYVDFREY	in_frame_ins	AML	M1	2	23634996
808642	TET2	c.760	R254*	nonsense	AML	M1	2	23634996
809653	CEBPA	c.426_425	R142fs	frame_shift_del	AML	M1	2	23634996
809653	NRAS	c.35	G12D	missense	AML	M1	2	23634996
809653	TP53	c.857	E286G	missense	AML	M1	2	23634996
816067	DNMT3A	c.2644	R882C	missense	AML	M5	2	23634996
816067	FLT3	c.1745_1744	T582in_frame_insMAGSSDNEYFYVDFREYES	in_frame_ins	AML	M5	2	23634996
816067	NPM1	c.863_864	W288fs	frame_shift_ins	AML	M5	2	23634996
817156	DNMT3A	c.2645	R882H	missense	AML	M2	2	23634996
817156	SRSF2	c.C284A	P95L	Missense	AML	M2	2	23634996
831711	STAG2	c.2401	Q801*	nonsense	AML	M1	2	23634996
831711	TET2	c.2746	Q916*	nonsense	AML	M1	2	23634996
831711	TET2	c.2072	P691L	missense	AML	M1	2	23634996
849660	CEBPA	c.913_912	304in_frame_insL	in_frame_ins	AML	M1	2	23634996
851929	DNMT3A	c.2478+2	e20+2	splice_site	AML	M1	2	23634996
851929	DNMT3A	c.2375	R792H	missense	AML	M1	2	23634996
851929	IDH2	c.515	R172K	missense	AML	M1	2	23634996
852559	PHF6	c.636_637	F213fs	frame_shift_ins	AML	M1	2	23634996
852559	PTPN11	c.1472	P491L	missense	AML	M1	2	23634996
868442	DNMT3A	c.2645	R882H	missense	AML	M4	2	23634996
868442	FLT3	c.2503	D835Y	missense	AML	M4	2	23634996
868442	NPM1	c.863_864	W288fs	frame_shift_ins	AML	M4	2	23634996
869586	NF1	c.3916	R1306*	nonsense	AML	M4	2	23634996
869586	PHF6	c.860	G287V	missense	AML	M4	2	23634996
869586	RUNX1	c.493_492	G164fs	frame_shift_ins	AML	M4	2	23634996
869586	WT1	c.1143_1142	A382fs	frame_shift_ins	AML	M4	2	23634996
869922	CEBPA	c.917_916	306in_frame_insQ	in_frame_ins	AML	M2	2	23634996
869922	CEBPA	c.137	P46fs	frame_shift_del	AML	M2	2	23634996
869922	DNMT3A	c.2645	R882H	missense	AML	M2	2	23634996
869922	GATA2	c.911	P304H	missense	AML	M2	2	23634996
884262	TP53	c.1+1	e0+1	splice_site	AML	M6	2	23634996
906708	TET2	c.3210	A1071fs	frame_shift_del	AML	M4	2	23634996
906708	TET2	c.1994	A665D	missense	AML	M4	2	23634996
907786	NRAS	c.34	G12C	missense	AML	M5	2	23634996
914247	IDH2	c.419	R140Q	missense	AML	M4	2	23634996
914247	SRSF2		G93R	Missense	AML	M4	2	23634996
933124	DNMT3A	c.2168	L723fs	frame_shift_del	AML	M1	2	23634996
933124	FLT3	c.1783_1782	594in_frame_insSDNEYFYVDF	in_frame_ins	AML	M1	2	23634996
933124	NPM1	c.863_864	W288fs	frame_shift_ins	AML	M1	2	23634996
936028	DNMT3A	c.2645	R882H	missense	AML	M2	2	23634996
936028	NPM1	c.861_862	W287fs	frame_shift_ins	AML	M2	2	23634996
938150	TP53	c.118_117	M39fs	frame_shift_ins	AML	M7	2	23634996
943309	FLT3	c.1801_1800	600in_frame_insFREYEYD	in_frame_ins	AML	M3	2	23634996
944281	FLT3	c.2503	D835Y	missense	AML	M4	2	23634996
957664	U2AF1	c.101	S34Y	missense	AML	M5	2	23634996
957664	DNMT3A	c.1843	Q615*	nonsense	AML	M5	2	23634996
957664	KRAS	c.35	G12V	missense	AML	M5	2	23634996
957664	NPM1	c.859_860	W288fs	frame_shift_ins	AML	M5	2	23634996
962561	RUNX1	c.484	R162G	missense	AML	M4	2	23634996
962561	SRSF2	c.C284G	P95H	Missense	AML	M4	2	23634996
972783	IDH2	c.419	R140Q	missense	AML	M0	2	23634996
972783	PHF6	c.586-1	e6-1	splice_site	AML	M0	2	23634996
972783	RUNX1	c.602	R201Q	missense	AML	M0	2	23634996
972783	SRSF2	c.C284A	P95L	Missense	AML	M0	2	23634996
974749	CEBPA	c.953_951	T318in_frame_del	in_frame_del	AML	M1	2	23634996
974749	DNMT3A	c.2645	R882H	missense	AML	M1	2	23634996
974749	IDH1	c.394	R132C	missense	AML	M1	2	23634996
975684	ASXL1	c.2756_2757	S921fs	frame_shift_ins	AML	M1	2	23634996
975684	DNMT3A	c.2645	R882H	missense	AML	M1	2	23634996
975684	IDH2	c.515	R172K	missense	AML	M1	2	23634996
975684	KRAS	c.176	A59E	missense	AML	M1	2	23634996
982009	CEBPA	c.857_856	R286fs	frame_shift_ins	AML	M1	2	23634996
982009	FLT3	c.2503	D835Y	missense	AML	M1	2	23634996
982009	NPM1	c.863_864	W288fs	frame_shift_ins	AML	M1	2	23634996
984036	EZH2	c.2195+1	e18+1	splice_site	AML	M1	2	23634996
984036	JAK2	c.1849	V617F	missense	AML	M1	2	23634996
984036	KRAS	c.35	G12D	missense	AML	M1	2	23634996
984036	RUNX1	c.592	D198N	missense	AML	M1	2	23634996
984036	RUNX1	c.422	S141L	missense	AML	M1	2	23634996
984036	TET2	c.2839	Q947*	nonsense	AML	M1	2	23634996
984036	TET2	c.669_670	K223fs	frame_shift_ins	AML	M1	2	23634996
984036	TET2	c.670_671	K224fs	frame_shift_ins	AML	M1	2	23634996
984036	SRSF2	c.C284G	P95R	Missense	AML	M1	2	23634996
986000	TP53	c.376-1	e4-1	splice_site	AML	M7	2	23634996
989176	NPM1	c.859_860	W288fs	frame_shift_ins	AML	M1	2	23634996
989176	SRSF2	c.C284G	P95R	Missense	AML	M1	2	23634996
991612	SRSF2	c.C283A	P95T	Missense	AML	M2	2	23634996
992966	IDH2	c.419	R140Q	missense	AML	M1	2	23634996
992966	SRSF2	c.C284G	P95H	Missense	AML	M1	2	23634996
997292	DNMT3A	c.2486	K829R	missense	AML	M2	2	23634996
997292	DNMT3A	c.1403	K468R	missense	AML	M2	2	23634996
997292	IDH1	c.394	R132C	missense	AML	M2	2	23634996
PD5711a	SRSF2	c.283C>A	P95T	Substitution	MDS	RCMD	3	24030381
PD5711a	TET2	c.1255delC	P419fs*8	Deletion	MDS	RCMD	3	24030381
PD5714a	RUNX1	c.484A>G	R162G	Substitution	MDS	RCMD	3	24030381
PD5714a	SRSF2	c.284C>T	P95L	Substitution	MDS	RCMD	3	24030381
PD5715a	PHF6	c.674G>A	R225Q	Substitution	MDS	RCMD	3	24030381
PD5715a	TET2	c.3860T>C	F1287S	Substitution	MDS	RCMD	3	24030381
PD5715a	TET2	c.3782G>A	R1261H	Substitution	MDS	RCMD	3	24030381
PD5717a	SRSF2	c.284C>T	P95L	Substitution	MDS	RCMD	3	24030381
PD5718a	BCOR	c.4609G>A	A1537T	Substitution	MDS	RCMD	3	24030381
PD5718a	EZH2	c.1003G>A	G335R	Substitution	MDS	RCMD	3	24030381
PD5720a	BCOR	c.4184G>A	R1395Q	Substitution	MDS	RCMD	3	24030381
PD5724a	RUNX1	c.320G>C	R107P	Substitution	MDS	RCMD	3	24030381
PD5724a	SRSF2	c.284C>A	P95H	Substitution	MDS	RCMD	3	24030381
PD5724a	TET2	c.4138C>T	H1380Y	Substitution	MDS	RCMD	3	24030381
PD5724a	TET2	c.4519C>T	Q1507*	Substitution	MDS	RCMD	3	24030381
PD5725a	SF3B1	c.2098A>G	K700E	Substitution	MDS	RCMD	3	24030381
PD5725a	EZH2	c.1355delA	Y452fs*11	Deletion	MDS	RCMD	3	24030381
PD5726a	NRAS	c.35G>T	G12V	Substitution	MDS	RCMD	3	24030381
PD5726a	ASXL1	c.2707_2708insC	N904fs*2	Insertion	MDS	RCMD	3	24030381
PD5726a	TET2	c.3629_3630delTG	C1211fs*11	Deletion	MDS	RCMD	3	24030381
PD5726a	TET2	c.1021C>T	Q341*	Substitution	MDS	RCMD	3	24030381
PD5726a	U2AF1	c.470A>G	Q157R	Substitution	MDS	RCMD	3	24030381
PD5728a	ASXL1	c.1927delG	G645fs*58	Deletion	MDS	RCMD	3	24030381
PD5728a	U2AF1	c.101C>T	S34F	Substitution	MDS	RCMD	3	24030381
PD5732a	DNMT3A	c.2644C>T	R882C	Substitution	MDS	RCMD	3	24030381
PD5732a	U2AF1	c.470A>C	Q157P	Substitution	MDS	RCMD	3	24030381
PD5733a	SRSF2	c.284C>G	P95R	Substitution	MDS	RCMD	3	24030381
PD5733a	ASXL1	c.1888_1910del23	E635fs*15	Deletion	MDS	RCMD	3	24030381
PD5735a	SRSF2	c.284C>A	P95H	Substitution	MDS	RCMD	3	24030381
PD5735a	ASXL1	c.1926_1927insG	G646fs*12	Insertion	MDS	RCMD	3	24030381
PD5735a	RUNX1	c.637_638insC	Q213fs*15	Insertion	MDS	RCMD	3	24030381
PD5736a	STAG2	c.2555C>G	A852G	Substitution	MDS	RCMD	3	24030381
PD5737a	JAK2	c.1849G>T	V617F	Substitution	MDS	RCMD	3	24030381
PD5737a	TET2	c.4794T>A	Y1598*	Substitution	MDS	RCMD	3	24030381
PD5737a	U2AF1	c.101C>T	S34F	Substitution	MDS	RCMD	3	24030381
PD5738a	TET2	c.2252_2253insA	N752fs*2	Insertion	MDS	RCMD	3	24030381
PD5740a	SRSF2	c.284C>T	P95L	Substitution	MDS	RAEB	3	24030381
PD5740a	TET2	c.3845G>A	G1282D	Substitution	MDS	RAEB	3	24030381
PD5740a	TP53	c.742C>T	R248W	Substitution	MDS	RAEB	3	24030381
PD5740a	ASXL1	c.1888_1910del23	E635fs*15	Deletion	MDS	RAEB	3	24030381
PD5740a	TET2	c.4521delG	A1508fs*63	Deletion	MDS	RAEB	3	24030381
PD5742a	DNMT3A	c.2194T>C	F732L	Substitution	MDS	RAEB	3	24030381
PD5743a	TET2	c.1059T>A	C353*	Substitution	MDS	RAEB	3	24030381
PD5744a	TET2	c.4108G>A	G1370R	Substitution	MDS	RAEB	3	24030381
PD5746a	DNMT3A	c.2644C>A	R882S	Substitution	MDS	RAEB	3	24030381
PD5746a	SF3B1	c.1998G>C	K666N	Substitution	MDS	RAEB	3	24030381
PD5746a	RUNX1	c.1076_1077insC	V360fs*240	Insertion	MDS	RAEB	3	24030381
PD5746a	BCOR	c.934C>T	Q312*	Substitution	MDS	RAEB	3	24030381
PD5747a	DNMT3A	c.2645G>A	R882H	Substitution	MDS	RAEB	3	24030381
PD5747a	SRSF2	c.284C>A	P95H	Substitution	MDS	RAEB	3	24030381
PD5747a	STAG2	c.1651A>G	K551E	Substitution	MDS	RAEB	3	24030381
PD5747a	TET2	c.2153delT	L719fs*32	Deletion	MDS	RAEB	3	24030381
PD5747a	TET2	c.1815delC	Y605fs*0	Deletion	MDS	RAEB	3	24030381
PD5748a	ASXL1	c.2407C>T	Q803*	Substitution	MDS	RAEB	3	24030381
PD5748a	RUNX1	c.319C>T	R107C	Substitution	MDS	RAEB	3	24030381
PD5748a	SRSF2	c.284C>G	P95R	Substitution	MDS	RAEB	3	24030381
PD5748a	STAG2	c.646C>T	R216*	Substitution	MDS	RAEB	3	24030381
PD5749a	IDH2	c.419G>A	R140Q	Substitution	MDS	RAEB	3	24030381
PD5749a	DNMT3A	c.1239delC	F414fs*237	Deletion	MDS	RAEB	3	24030381
PD5750a	SRSF2	c.284C>T	P95L	Substitution	MDS	RAEB	3	24030381
PD5750a	TET2	c.2269delC	L757fs*56	Deletion	MDS	RAEB	3	24030381
PD5751a	SRSF2	c.284C>T	P95L	Substitution	MDS	RAEB	3	24030381
PD5751a	TET2	c.3852_3854delCTT	F1285delF	Deletion	MDS	RAEB	3	24030381
PD5754a	ASXL1	c.2047A>G	T683A	Substitution	MDS	RAEB	3	24030381
PD5754a	IDH2	c.419G>A	R140Q	Substitution	MDS	RAEB	3	24030381
PD5754a	SRSF2	c.283_284insGCC	R94_P95insR	Insertion	MDS	RAEB	3	24030381
PD5755a	DNMT3A	c.2524C>G	Q842E	Substitution	MDS	RAEB	3	24030381
PD5755a	TP53	c.817C>T	R273C	Substitution	MDS	RAEB	3	24030381
PD5756a	EZH2	c.2068C>T	R690C	Substitution	MDS	RAEB	3	24030381
PD5756a	EZH2	c.2069G>A	R690H	Substitution	MDS	RAEB	3	24030381
PD5756a	ASXL1	c.1888_1910del23	E635fs*15	Deletion	MDS	RAEB	3	24030381
PD5756a	STAG2	c.3034C>T	R1012*	Substitution	MDS	RAEB	3	24030381
PD5756a	U2AF1	c.470A>C	Q157P	Substitution	MDS	RAEB	3	24030381
PD5757a	TET2	c.4513G>A	A1505T	Substitution	MDS	RAEB	3	24030381
PD5758a	TET2	c.1379C>T	S460F	Substitution	MDS	RAEB	3	24030381
PD5759a	SRSF2	c.284C>A	P95H	Substitution	MDS	MDS-U	3	24030381
PD5760a	ASXL1	c.1249C>T	R417*	Substitution	MDS	MDS-U	3	24030381
PD5762a	DNMT3A	c.2422_2437del16	T808fs*12	Deletion	MDS	MDS-U	3	24030381
PD5765a	JAK2	c.2144G>C	R715T	Substitution	MDS	MDS-U	3	24030381
PD5765a	RUNX1	c.485G>A	R162K	Substitution	MDS	MDS-U	3	24030381
PD5765a	NF1	c.4600C>T	R1534*	Substitution	MDS	MDS-U	3	24030381
PD5768a	DNMT3A	c.2645G>C	R882P	Substitution	MDS	RA	3	24030381
PD5768a	IDH2	c.419G>A	R140Q	Substitution	MDS	RA	3	24030381
PD5768a	SRSF2	c.284C>A	P95H	Substitution	MDS	RA	3	24030381
PD5768a	BCOR	c.3621_3622insA	Q1208fs*8	Insertion	MDS	RA	3	24030381
PD5768a	STAG2	c.3088_3089insTG	S1031fs*12	Insertion	MDS	RA	3	24030381
PD5776a	TET2	c.4475A>G	E1492G	Substitution	MDS	RA	3	24030381
PD5776a	TET2	c.3708_3710delCCC	I1236_P1237>M	Deletion	MDS	RA	3	24030381
PD5776a	TET2	c.2746C>T	Q916*	Substitution	MDS	RA	3	24030381
PD5777a	DNMT3A	c.2096delG	G699fs*6	Deletion	MDS	RA	3	24030381
PD5779a	SF3B1	c.1986C>G	H662Q	Substitution	MDS	RA	3	24030381
PD5780a	SF3B1	c.2098A>G	K700E	Substitution	MDS	RA	3	24030381
PD5781a	DNMT3A	c.1937G>A	G646E	Substitution	MDS	RA	3	24030381
PD5781a	SF3B1	c.2098A>G	K700E	Substitution	MDS	RA	3	24030381
PD5785a	TET2	c.4546C>T	R1516*	Substitution	CMML		3	24030381
PD5785a	BRAF	c.1781A>G	D594G	Substitution	CMML		3	24030381
PD5785a	SRSF2	c.284C>A	P95H	Substitution	CMML		3	24030381
PD5786a	TET2	c.4790_4791delTC	F1597fs*16	Deletion	CMML		3	24030381
PD5786a	TET2	c.4988delG	S1663fs*32	Deletion	CMML		3	24030381
PD5786a	ZRSR2	c.563C>G	S188*	Substitution	CMML		3	24030381
PD6050a	TP53	c.774A>T	E258D	Substitution	MDS	RAEB	3	24030381
PD6053a	U2AF1	c.101C>T	S34F	Substitution	MDS	RAEB	3	24030381
PD6054a	SF3B1	c.1986C>G	H662Q	Substitution	MDS	RARS	3	24030381
PD6054a	TET2	c.4060_4061delAG	R1354fs*46	Deletion	MDS	RARS	3	24030381
PD6057a	ASXL1	c.3988C>T	P1330S	Substitution	MDS	RA	3	24030381
PD6057a	FLT3	c.1517C>T	A506V	Substitution	MDS	RA	3	24030381
PD6057a	TET2	c.4825T>A	L1609M	Substitution	MDS	RA	3	24030381
PD6057a	TET2	c.5681C>T	P1894L	Substitution	MDS	RA	3	24030381
PD6057a	BCOR	c.2514_2515insC	K839fs*5	Insertion	MDS	RA	3	24030381
PD6058a	CBL	c.1151G>A	C384Y	Substitution	MDS	RCMD	3	24030381
PD6058a	IDH2	c.419G>A	R140Q	Substitution	MDS	RCMD	3	24030381
PD6058a	SRSF2	c.284C>G	P95R	Substitution	MDS	RCMD	3	24030381
PD6059a	SF3B1	c.1997A>G	K666R	Substitution	MDS	RCMD-RS	3	24030381
PD6059a	TET2	c.3626delT	L1209fs*17	Deletion	MDS	RCMD-RS	3	24030381
PD6059a	TET2	c.1528G>T	E510*	Substitution	MDS	RCMD-RS	3	24030381
PD6062a	SF3B1	c.1986C>A	H662Q	Substitution	MDS	RCMD-RS	3	24030381
PD6062a	GNAS	c.345_356delCGAGTCCGAAAT	I119_E122delIESE	Deletion	MDS	RCMD-RS	3	24030381
PD6062a	TET2	c.4250_4251insTCTG	P1419fs*8	Insertion	MDS	RCMD-RS	3	24030381
PD6070a	SF3B1	c.2098A>G	K700E	Substitution	MDS	RCMD-RS	3	24030381
PD6072a	KRAS	c.284A>T	H95L	Substitution	MDS	RAEB	3	24030381
PD6072a	SRSF2	c.284C>G	P95R	Substitution	MDS	RAEB	3	24030381
PD6072a	ZRSR2	c.1177delG	E394fs*>95	Deletion	MDS	RAEB	3	24030381
PD6074a	SF3B1	c.2098A>G	K700E	Substitution	MDS	RARS	3	24030381
PD6075a	EZH2	c.1779_1780delTG	C593fs*4	Deletion	MDS	RA	3	24030381
PD6079a	CBL	c.1250C>T	P417L	Substitution	MDS	RAEB	3	24030381
PD6079a	NRAS	c.35G>A	G12D	Substitution	MDS	RAEB	3	24030381
PD6079a	SF3B1	c.2098A>G	K700E	Substitution	MDS	RAEB	3	24030381
PD6080a	JAK2	c.322A>T	T108S	Substitution	MDS	RCMD	3	24030381
PD6080a	TET2	c.369_370insT	N124fs*0	Insertion	MDS	RCMD	3	24030381
PD6080a	TET2	c.1259C>G	S420*	Substitution	MDS	RCMD	3	24030381
PD6081a	DNMT3A	c.1067A>G	Q356R	Substitution	MDS	RCMD	3	24030381
PD6081a	TET2	c.5642A>C	H1881P	Substitution	MDS	RCMD	3	24030381
PD6081a	TP53	c.774A>T	E258D	Substitution	MDS	RCMD	3	24030381
PD6081a	NF1	c.1873+5T>C		Substitution	MDS	RCMD	3	24030381
PD6081a	ASXL1	c.1934_1935insG	G646fs*12	Insertion	MDS	RCMD	3	24030381
PD6081a	TET2	c.5010_5011insA	S1671fs*16	Insertion	MDS	RCMD	3	24030381
PD6081a	BCOR	c.4582C>T	Q1528*	Substitution	MDS	RCMD	3	24030381
PD6085a	SF3B1	c.2098A>G	K700E	Substitution	MDS	RARS	3	24030381
PD6086a	SF3B1	c.1997A>G	K666R	Substitution	MDS	RA	3	24030381
PD6088a	GNAS	c.284G>A	S95N	Substitution	MDS	RAEB	3	24030381
PD6088a	ETV6	c.308_309insCTAT	R105fs*8	Insertion	MDS	RAEB	3	24030381
PD6088a	U2AF1	c.470A>C	Q157P	Substitution	MDS	RAEB	3	24030381
PD6090a	SRSF2	c.284C>A	P95H	Substitution	MDS	RCMD-RS	3	24030381
PD6090a	ASXL1	c.1934_1935insG	G646fs*12	Insertion	MDS	RCMD-RS	3	24030381
PD6091a	SF3B1	c.1874G>T	R625L	Substitution	MDS	RARS	3	24030381
PD6091a	ASXL1	c.1935_1936insT	G646fs*12	Insertion	MDS	RARS	3	24030381
PD6091a	NF1	c.7231A>T	R2411*	Substitution	MDS	RARS	3	24030381
PD6092a	GNAS	c.610G>A	A204T	Substitution	MDS	RARS	3	24030381
PD6092a	SF3B1	c.2098A>G	K700E	Substitution	MDS	RARS	3	24030381
PD6092a	U2AF2	c.460G>A	G154S	Substitution	MDS	RARS	3	24030381
PD6093a	JAK2	c.1849G>T	V617F	Substitution	MDS	RCMD	3	24030381
PD6093a	ZRSR2	c.554A>G	D185G	Substitution	MDS	RCMD	3	24030381
PD6093a	ASXL1	c.2332C>T	Q778*	Substitution	MDS	RCMD	3	24030381
PD6093a	U2AF1	c.470A>C	Q157P	Substitution	MDS	RCMD	3	24030381
PD6094a	SF3B1	c.2098A>G	K700E	Substitution	MDS	RARS	3	24030381
PD6095a	IDH2	c.419G>A	R140Q	Substitution	MDS	RAEB	3	24030381
PD6095a	SRSF2	c.284C>A	P95H	Substitution	MDS	RAEB	3	24030381
PD6098a	EZH2	c.1154G>C	S385T	Substitution	MDS	RAEB	3	24030381
PD6098a	NRAS	c.443C>G	T148S	Substitution	MDS	RAEB	3	24030381
PD6098a	RUNX1	c.575C>T	A192V	Substitution	MDS	RAEB	3	24030381
PD6098a	IDH1	c.633_634insA	N213fs*8	Insertion	MDS	RAEB	3	24030381
PD6099a	CBL	c.1222T>A	W408R	Substitution	MDS	RCMD	3	24030381
PD6099a	SRSF2	c.284C>G	P95R	Substitution	MDS	RCMD	3	24030381
PD6099a	SRSF2	c.284_307del24	P95_R102delPPDSHHSR	Deletion	MDS	RCMD	3	24030381
PD6100a	GNAS	c.752G>A	G251D	Substitution	MDS	RARS	3	24030381
PD6100a	JAK2	c.85G>A	A29T	Substitution	MDS	RARS	3	24030381
PD6100a	NF1	c.2896G>A	A966T	Substitution	MDS	RARS	3	24030381
PD6100a	RUNX1	c.751G>A	A251T	Substitution	MDS	RARS	3	24030381
PD6100a	SF3B1	c.3686C>T	A1229V	Substitution	MDS	RARS	3	24030381
PD6100a	STAG2	c.1682C>T	T561I	Substitution	MDS	RARS	3	24030381
PD6101a	ZRSR2	c.955C>T	Q319*	Substitution	MDS	RAEB	3	24030381
PD6106a	CBL	c.1222T>A	W408R	Substitution	MDS	RAEB	3	24030381
PD6106a	SRSF2	c.284C>G	P95R	Substitution	MDS	RAEB	3	24030381
PD6106a	SRSF2	c.284_307del24	P95_R102delPPDSHHSR	Deletion	MDS	RAEB	3	24030381
PD6107a	DNMT3A	c.2711C>T	P904L	Substitution	MDS	RARS	3	24030381
PD6107a	SF3B1	c.1986C>G	H662Q	Substitution	MDS	RARS	3	24030381
PD6107a	TET2	c.5508_5509delGG	A1837fs*8	Deletion	MDS	RARS	3	24030381
PD6110a	WT1	c.1081G>C	V361L	Substitution	MDS	RA	3	24030381
PD6112a	JAK2	c.747C>G	N249K	Substitution	MDS	RAEB	3	24030381
PD6112a	ASXL1	c.1888_1910del23	E635fs*15	Deletion	MDS	RAEB	3	24030381
PD6119a	JAK2	c.1193G>C	S398T	Substitution	MDS	RCMD-RS	3	24030381
PD6119a	NF1	c.4352A>G	N1451S	Substitution	MDS	RCMD-RS	3	24030381
PD6119a	EZH2	c.1834C>T	Q612*	Substitution	MDS	RCMD-RS	3	24030381
PD6120a	BCOR	c.2518C>T	P840S	Substitution	MDS	RCMD-RS	3	24030381
PD6120a	SF3B1	c.2098A>G	K700E	Substitution	MDS	RCMD-RS	3	24030381
PD6121a	BRAF	c.205G>A	G69S	Substitution	MDS	RAEB	3	24030381
PD6122a	SF3B1	c.1997A>C	K666T	Substitution	MDS	RCMD-RS	3	24030381
PD6122a	ASXL1	c.3187_3188insA	S1064fs*23	Insertion	MDS	RCMD-RS	3	24030381
PD6122a	CBL	c.1027C>T	R343*	Substitution	MDS	RCMD-RS	3	24030381
PD6124a	SRSF2	c.284C>G	P95R	Substitution	MDS	RCMD-RS	3	24030381
PD6124a	TET2	c.2632delC	L878fs*43	Deletion	MDS	RCMD-RS	3	24030381
PD6124a	TET2	c.1864C>T	Q622*	Substitution	MDS	RCMD-RS	3	24030381
PD6125a	DNMT3A	c.1165G>A	D389N	Substitution	MDS	RCMD	3	24030381
PD6125a	TET2	c.3202C>T	Q1068*	Substitution	MDS	RCMD	3	24030381
PD6126a	EZH2	c.2035G>A	V679M	Substitution	MDS	RCMD-RS	3	24030381
PD6126a	SF3B1	c.2342A>G	D781G	Substitution	MDS	RCMD-RS	3	24030381
PD6126a	TET2	c.3995T>C	L1332P	Substitution	MDS	RCMD-RS	3	24030381
PD6126a	ASXL1	c.1926_1927insA	G643fs*15	Insertion	MDS	RCMD-RS	3	24030381
PD6126a	EZH2	c.745G>T	E249*	Substitution	MDS	RCMD-RS	3	24030381
PD6128a	ETV6	c.631C>T	R211C	Substitution	MDS	RAEB	3	24030381
PD6130a	KIT	c.2281G>A	E761K	Substitution	MDS	RAEB	3	24030381
PD6131a	SF3B1	c.1874G>T	R625L	Substitution	MDS	RCMD-RS	3	24030381
PD6133a	SF3B1	c.2098A>G	K700E	Substitution	MDS	RA	3	24030381
PD6135a	DNMT3A	c.2645G>A	R882H	Substitution	MDS	RAEB	3	24030381
PD6135a	NPM1	c.863_864insTCTG	W288fs*12	Insertion	MDS	RAEB	3	24030381
PD6139a	EZH2	c.1582T>C	C528R	Substitution	MDS	RAEB	3	24030381
PD6139a	NF1	c.2032C>A	P678T	Substitution	MDS	RAEB	3	24030381
PD6139a	GATA2	c.915_916delCT	W306fs*77	Deletion	MDS	RAEB	3	24030381
PD6140a	SF3B1	c.2098A>G	K700E	Substitution	MDS	RARS	3	24030381
PD6141a	DNMT3A	c.1640T>G	L547R	Substitution	MDS	RCMD-RS	3	24030381
PD6141a	SF3B1	c.2098A>G	K700E	Substitution	MDS	RCMD-RS	3	24030381
PD6141a	TET2	c.3697T>G	W1233G	Substitution	MDS	RCMD-RS	3	24030381
PD6142a	BCOR	c.1987C>A	P663T	Substitution	MDS	RA	3	24030381
PD6142a	DNMT3A	c.1102G>A	A368T	Substitution	MDS	RA	3	24030381
PD6142a	SF3B1	c.2098A>G	K700E	Substitution	MDS	RA	3	24030381
PD6142a	TET2	c.4076G>A	R1359H	Substitution	MDS	RA	3	24030381
PD6143a	ASXL1	c.1205G>A	R402Q	Substitution	MDS	RAEB	3	24030381
PD6143a	SRSF2	c.284C>A	P95H	Substitution	MDS	RAEB	3	24030381
PD6144a	SF3B1	c.2098A>G	K700E	Substitution	MDS	RARS	3	24030381
PD6145a	NF1	c.848A>G	D283G	Substitution	MDS	RARS	3	24030381
PD6145a	SF3B1	c.2230G>C	A744P	Substitution	MDS	RARS	3	24030381
PD6147a	NRAS	c.183A>T	Q61H	Substitution	MDS	RAEB	3	24030381
PD6147a	RUNX1	c.496C>T	R166*	Substitution	MDS	RAEB	3	24030381
PD6147a	U2AF1	c.101C>T	S34F	Substitution	MDS	RAEB	3	24030381
PD6148a	SF3B1	c.1873C>T	R625C	Substitution	MDS	RARS	3	24030381
PD6149a	DNMT3A	c.2645G>A	R882H	Substitution	MDS	RAEB	3	24030381
PD6149a	SF3B1	c.1874G>T	R625L	Substitution	MDS	RAEB	3	24030381
PD6151a	DNMT3A	c.2204A>G	Y735C	Substitution	MDS	RCMD-RS	3	24030381
PD6151a	SF3B1	c.2098A>G	K700E	Substitution	MDS	RCMD-RS	3	24030381
PD6152a	STAG2	c.2884delG	D962fs*3	Deletion	MDS	RCMD	3	24030381
PD6152a	STAG2	c.1907_1908insA	Y636fs*0	Insertion	MDS	RCMD	3	24030381
PD6153a	JAK2	c.718T>C	F240L	Substitution	MDS	RAEB	3	24030381
PD6153a	SF3B1	c.2098A>G	K700E	Substitution	MDS	RAEB	3	24030381
PD6153a	ASXL1	c.1633_1634insC	R545fs*6	Insertion	MDS	RAEB	3	24030381
PD6155a	EZH2	c.2069G>A	R690H	Substitution	MDS	RAEB	3	24030381
PD6155a	SF3B1	c.1873C>T	R625C	Substitution	MDS	RAEB	3	24030381
PD6155a	STAG2	c.1452_1453insGGGGA	W485fs*10	Insertion	MDS	RAEB	3	24030381
PD6155a	TET2	c.4760_4761insT	I1588fs*26	Insertion	MDS	RAEB	3	24030381
PD6155a	RUNX1	c.496C>T	R166*	Substitution	MDS	RAEB	3	24030381
PD6156a	ASXL1	c.2919delT	Y974fs*10	Deletion	MDS	RCMD	3	24030381
PD6156a	RUNX1	c.1184delC	P395fs*199	Deletion	MDS	RCMD	3	24030381
PD6157a	SRSF2	c.284C>T	P95H	Substitution	MDS	RAEB	3	24030381
PD6157a	BCOR		Coding fs	Complex InsertionDeletion	MDS	RAEB	3	24030381
PD6158a	SF3B1	c.1997A>G	K666R	Substitution	MDS	RARS	3	24030381
PD6160a	TET2	c.4177A>G	T1393A	Substitution	MDS	RAEB	3	24030381
PD6160a	U2AF1	c.470A>G	Q157R	Substitution	MDS	RAEB	3	24030381
PD6162a	SRSF2	c.284C>A	P95H	Substitution	MDS	RAEB	3	24030381
PD6162a	ZRSR2	c.571C>T	H191Y	Substitution	MDS	RAEB	3	24030381
PD6163a	DNMT3A	c.2644C>T	R882C	Substitution	MDS	RCMD-RS	3	24030381
PD6163a	SF3B1	c.2098A>G	K700E	Substitution	MDS	RCMD-RS	3	24030381
PD6164a	SRSF2	c.284C>A	P95H	Substitution	MDS	RAEB	3	24030381
PD6164a	ASXL1	c.2197C>T	Q733*	Substitution	MDS	RAEB	3	24030381
PD6164a	RUNX1	c.784C>T	Q262*	Substitution	MDS	RAEB	3	24030381
PD6165a	SF3B1	c.1866G>T	E622D	Substitution	MDS	RARS	3	24030381
PD6165a	ASXL1	c.2323_2324insA	L775fs*12	Insertion	MDS	RARS	3	24030381
PD6165a	TET2	c.1593_1594insA	L532fs*35	Insertion	MDS	RARS	3	24030381
PD6169a	ASXL1	c.2708_2709insGAAT	D905fs*2	Insertion	MDS	RCMD	3	24030381
PD6169a	DNMT3A	c.1005delA	K335fs*10	Deletion	MDS	RCMD	3	24030381
PD6171a	ASXL1	c.1934_1935insG	G646fs*12	Insertion	MDS	RA	3	24030381
PD6171a	DNMT3A	c.1578C>A	Y526*	Substitution	MDS	RA	3	24030381
PD6171a	RUNX1	c.667G>T	E223*	Substitution	MDS	RA	3	24030381
PD6172a	ASXL1	c.1627_1628insG	E543fs*8	Insertion	MDS	RA	3	24030381
PD6173a	U2AF1	c.470A>G	Q157R	Substitution	MDS	RA	3	24030381
PD6175a	DNMT3A	c.1031T>A	L344Q	Substitution	MDS	RA	3	24030381
PD6178a	CBL	c.1112A>C	Y371S	Substitution	MDS	5q-	3	24030381
PD6179a	RUNX1	c.611G>T	R204L	Substitution	MDS	RAEB	3	24030381
PD6179a	SRSF2	c.284C>A	P95H	Substitution	MDS	RAEB	3	24030381
PD6179a	ASXL1		Coding fs	Complex InsertionDeletion	MDS	RAEB	3	24030381
PD6179a	STAG2	c.2055T>A	Y685*	Substitution	MDS	RAEB	3	24030381
PD6181a	SRSF2	c.284C>T	P95L	Substitution	MDS	RAEB	3	24030381
PD6181a	ASXL1	c.1934_1935insG	G646fs*12	Insertion	MDS	RAEB	3	24030381
PD6181a	RUNX1	c.1031_1032insC	R346fs*254	Insertion	MDS	RAEB	3	24030381
PD6182a	IDH2	c.419G>A	R140Q	Substitution	MDS	RAEB	3	24030381
PD6182a	SRSF2	c.284C>A	P95H	Substitution	MDS	RAEB	3	24030381
PD6182a	STAG2	c.3133C>T	R1045*	Substitution	MDS	RAEB	3	24030381
PD6183a	FLT3	c.2211G>C	M737I	Substitution	MDS	RAEB	3	24030381
PD6183a	ASXL1	c.1934_1935insG	G646fs*12	Insertion	MDS	RAEB	3	24030381
PD6184a	JAK2	c.1849G>T	V617F	Substitution	MDS	RAEB	3	24030381
PD6185a	JAK2	c.1402_1404delAAG	K468delK	Deletion	MDS	RAEB	3	24030381
PD6186a	DNMT3A	c.2576delT	L859fs*22	Deletion	MDS	RAEB	3	24030381
PD6187a	TP53	c.535C>G	H179D	Substitution	MDS	RAEB	3	24030381
PD6187a	TP53	c.455_456insC	P153fs*28	Insertion	MDS	RAEB	3	24030381
PD6188a	PHF6	c.833T>A	M278K	Substitution	MDS	RAEB	3	24030381
PD6188a	RUNX1	c.299C>T	S100F	Substitution	MDS	RAEB	3	24030381
PD6188a	ASXL1	c.1888_1910del23	E635fs*15	Deletion	MDS	RAEB	3	24030381
PD6188a	U2AF1	c.470A>C	Q157P	Substitution	MDS	RAEB	3	24030381
PD6189a	SRSF2	c.284C>A	P95H	Substitution	MDS	RAEB	3	24030381
PD6189a	ASXL1	c.1934_1935insG	G646fs*12	Insertion	MDS	RAEB	3	24030381
PD6189a	TET2	c.2665delA	K889fs*32	Deletion	MDS	RAEB	3	24030381
PD6189a	TET2	c.4879C>T	Q1627*	Substitution	MDS	RAEB	3	24030381
PD6190a	DNMT3A	c.2569G>A	D857N	Substitution	MDS	RAEB	3	24030381
PD6191a	IDH2	c.419G>A	R140Q	Substitution	MDS	RAEB	3	24030381
PD6191a	PHF6	c.719A>G	Y240C	Substitution	MDS	RAEB	3	24030381
PD6191a	ASXL1	c.1926_1927insG	G646fs*12	Insertion	MDS	RAEB	3	24030381
PD6191a	RUNX1	c.1217_1218insTGTA	Y407fs*194	Insertion	MDS	RAEB	3	24030381
PD6191a	U2AF1	c.470A>C	Q157P	Substitution	MDS	RAEB	3	24030381
PD6192a	JAK2	c.1849G>T	V617F	Substitution	MDS	RAEB	3	24030381
PD6192a	TP53	c.686_687delGT	C229fs*10	Deletion	MDS	RAEB	3	24030381
PD6192a	TET2	c.2504C>A	S835*	Substitution	MDS	RAEB	3	24030381
PD6192a	TET2	c.3748G>T	E1250*	Substitution	MDS	RAEB	3	24030381
PD6193a	DNMT3A	c.886G>T	V296L	Substitution	MDS	RCMD	3	24030381
PD6194a	PHF6	c.130A>T	K44*	Substitution	MDS	RCMD	3	24030381
PD6194a	TET2	c.1630C>T	R544*	Substitution	MDS	RCMD	3	24030381
PD6195a	BCOR	c.4818delT	C1606fs*12	Deletion	MDS	RCMD	3	24030381
PD6195a	U2AF1	c.101C>T	S34F	Substitution	MDS	RCMD	3	24030381
PD6196a	SF3B1	c.2098A>G	K700E	Substitution	MDS	RCMD-RS	3	24030381
PD6196a	TET2	c.3631T>C	C1211R	Substitution	MDS	RCMD-RS	3	24030381
PD6197a	DNMT3A	c.2578T>C	W860R	Substitution	MDS	RCMD-RS	3	24030381
PD6197a	SF3B1	c.1996A>C	K666Q	Substitution	MDS	RCMD-RS	3	24030381
PD6197a	CBL	c.1027C>T	R343*	Substitution	MDS	RCMD-RS	3	24030381
PD6201a	TET2	c.2646C>A	C882*	Substitution	CMML		3	24030381
PD6201a	TET2	c.3781C>T	R1261C	Substitution	CMML		3	24030381
PD6201a	SRSF2	c.283C>G	P95A	Substitution	CMML		3	24030381
PD6201a	PHF6	c.469delA	S158fs*60	Deletion	CMML		3	24030381
PD6201a	PHF6	c.941T>C	I314T	Substitution	CMML		3	24030381
PD6202a	DNMT3A	c.2644C>T	R882C	Substitution	CMML		3	24030381
PD6202a	NPM1	c.863_864insTCTG	W288fs*12	Insertion	CMML		3	24030381
PD6203a	SF3B1	c.2230G>C	A744P	Substitution	CMML		3	24030381
PD6203a	TET2	c.822delC	N275fs*18	Deletion	CMML		3	24030381
PD6203a	TET2	c.1588C>T	Q530*	Substitution	CMML		3	24030381
PD6203a	BRAF	c.1497A>T	K499N	Substitution	CMML		3	24030381
PD6203a	EZH2	c.862C>T	R288*	Substitution	CMML		3	24030381
PD6206a	ZRSR2	c.96_97insCTGA	E33fs*23	Insertion	MDS	RA	3	24030381
PD6206a	TET2	c.1630C>T	R544*	Substitution	MDS	RA	3	24030381
PD6211a	TET2	c.4012A>T	K1338*	Substitution	CMML		3	24030381
PD6212a	CBL	c.1211G>A	C404Y	Substitution	MDS	RAEB	3	24030381
PD6212a	CBL	c.1267A>T	I423F	Substitution	MDS	RAEB	3	24030381
PD6212a	CBL	c.1167G>T	K389N	Substitution	MDS	RAEB	3	24030381
PD6214a	EZH2	c.817C>T	Q273*	Substitution	CMML		3	24030381
PD6215a	FLT3	c.871G>C	A291P	Substitution	MDS	RAEB	3	24030381
PD6215a	KRAS	c.35G>A	G12D	Substitution	MDS	RAEB	3	24030381
PD6215a	TP53	c.590T>A	V197E	Substitution	MDS	RAEB	3	24030381
PD6215a	TP53	c.646G>A	V216M	Substitution	MDS	RAEB	3	24030381
PD6217a	ASXL1	c.2422delC	P808fs*10	Deletion	MDS	RA	3	24030381
PD6221a	SF3B1	c.1986C>G	H662Q	Substitution	MDS	RARS	3	24030381
PD6223a	NRAS	c.35G>A	G12D	Substitution	MDS	RAEB	3	24030381
PD6224a	SF3B1	c.1986C>G	H662Q	Substitution	MDS	RARS	3	24030381
PD6224a	TET2	c.2351_2352insA	C784fs*0	Insertion	MDS	RARS	3	24030381
PD6224a	TET2	c.2355_2356insT	H786fs*3	Insertion	MDS	RARS	3	24030381
PD6224a	TET2	c.822delC	N275fs*18	Deletion	MDS	RARS	3	24030381
PD6225a	SF3B1	c.2098A>G	K700E	Substitution	CMML		3	24030381
PD6225a	TET2	c.845_846insT	E283fs*0	Insertion	CMML		3	24030381
PD6228a	KIT	c.2089C>T	H697Y	Substitution	MDS	RA	3	24030381
PD6228a	TET2	c.2965_2966insAAGC	P989fs*21	Insertion	MDS	RA	3	24030381
PD6231a	DNMT3A	c.939G>A	W313*	Substitution	MDS	RA	3	24030381
PD6232a	JAK2	c.2182A>G	K728E	Substitution	MDS	RA	3	24030381
PD6232a	SRSF2	c.284C>A	P95H	Substitution	MDS	RA	3	24030381
PD6232a	CEBPA	c.897_898insCG	D301fs*18	Insertion	MDS	RA	3	24030381
PD6232a	TET2	c.3545_3546insGAA	Y1182>*	Insertion	MDS	RA	3	24030381
PD6232a	TET2	c.5254A>T	K1752*	Substitution	MDS	RA	3	24030381
PD6233a	DNMT3A	c.2645G>A	R882H	Substitution	MDS	RA	3	24030381
PD6233a	IDH2	c.419G>A	R140Q	Substitution	MDS	RA	3	24030381
PD6233a	BCOR	c.4862delC	P1621fs*53	Deletion	MDS	RA	3	24030381
PD6235a	TP53	c.490A>G	K164E	Substitution	MDS	RAEB	3	24030381
PD6236a	SRSF2	c.230G>A	G77E	Substitution	MDS	RAEB	3	24030381
PD6238a	ZRSR2	c.328C>T	Q110*	Substitution	MDS	RA	3	24030381
PD6239a	SF3B1	c.3436G>A	G1146R	Substitution	CMML		3	24030381
PD6240a	PHF6	c.61delA	K21fs*12	Deletion	MDS	RARS	3	24030381
PD6240a	CBL	c.616C>T	R206*	Substitution	MDS	RARS	3	24030381
PD6240a	U2AF1	c.470A>C	Q157P	Substitution	MDS	RARS	3	24030381
PD6241a	ASXL1	c.1888_1910del23	E635fs*15	Deletion	MDS	RAEB	3	24030381
PD6241a	U2AF1	c.470A>C	Q157P	Substitution	MDS	RAEB	3	24030381
PD6242a	NRAS	c.35G>A	G12D	Substitution	MDS	RAEB	3	24030381
PD6242a	NRAS	c.38G>T	G13V	Substitution	MDS	RAEB	3	24030381
PD6242a	BCOR	c.3947_3956delGGCCGCCTGC	R1316fs*50	Deletion	MDS	RAEB	3	24030381
PD6242a	U2AF1	c.101C>T	S34F	Substitution	MDS	RAEB	3	24030381
PD6244a	EZH2	c.2009T>C	F670S	Substitution	MDS	RA	3	24030381
PD6244a	TET2	c.3873G>T	W1291C	Substitution	MDS	RA	3	24030381
PD6244a	ASXL1	c.1888_1910del23	E635fs*15	Deletion	MDS	RA	3	24030381
PD6244a	TET2	c.2551delC	P851fs*22	Deletion	MDS	RA	3	24030381
PD6245a	TET2	c.1070delG	S357fs*15	Deletion	CMML		3	24030381
PD6245a	TET2	c.3010delA	K1005fs*2	Deletion	CMML		3	24030381
PD6245a	FLT3	c.686T>A	I229K	Substitution	CMML		3	24030381
PD6245a	ZRSR2	c.543C>A	C181*	Substitution	CMML		3	24030381
PD6245a	PHF6	c.92T>G	L31*	Substitution	CMML		3	24030381
PD6246a	TP53	c.713G>A	C238Y	Substitution	MDS	5q-	3	24030381
PD6246a	U2AF1	c.470A>C	Q157P	Substitution	MDS	5q-	3	24030381
PD6247a	ASXL1	c.3569G>A	R1190K	Substitution	MDS	RARS	3	24030381
PD6247a	SF3B1	c.2098A>G	K700E	Substitution	MDS	RARS	3	24030381
PD6247a	TET2	c.5704T>C	Y1902H	Substitution	MDS	RARS	3	24030381
PD6247a	STAG2	c.2372_2373delTG	C792fs*0	Deletion	MDS	RARS	3	24030381
PD6249a	SF3B1	c.1986C>G	H662Q	Substitution	MDS	RARS	3	24030381
PD6250a	SF3B1	c.1986C>G	H662Q	Substitution	MDS	RARS	3	24030381
PD6251a	EZH2	c.1682G>C	R561P	Substitution	MDS	RAEB	3	24030381
PD6251a	U2AF1	c.470A>C	Q157P	Substitution	MDS	RAEB	3	24030381
PD6252a	TET2	c.506_507delAT	H169fs*6	Deletion	CMML		3	24030381
PD6252a	TET2	c.762delT	Q255fs*38	Deletion	CMML		3	24030381
PD6252a	ZRSR2	c.850_851insT	S285fs*4	Insertion	CMML		3	24030381
PD6253a	TET2	c.5885C>T	P1962L	Substitution	CMML		3	24030381
PD6253a	SRSF2	c.284C>A	P95H	Substitution	CMML		3	24030381
PD6253a	RUNX1	c.611G>A	R204Q	Substitution	CMML		3	24030381
PD6253a	STAG2	c.3201_3202insG	S1068fs*6	Insertion	CMML		3	24030381
PD6254a	RUNX1	c.315C>G	H105Q	Substitution	MDS	RA	3	24030381
PD6254a	SRSF2	c.284C>A	P95H	Substitution	MDS	RA	3	24030381
PD6254a	TET2	c.1262delA	G422fs*5	Deletion	MDS	RA	3	24030381
PD6255a	TET2	c.3730_3731delCT	Y1245fs*22	Deletion	CMML		3	24030381
PD6255a	TET2	c.4393C>T	R1465*	Substitution	CMML		3	24030381
PD6255a	CBL	c.1027C>T	R343*	Substitution	CMML		3	24030381
PD6255a	CBL	c.1259G>A	R420Q	Substitution	CMML		3	24030381
PD6255a	SRSF2	c.283C>A	P95T	Substitution	CMML		3	24030381
PD6256a	DNMT3A	c.2728G>C	A910P	Substitution	CMML		3	24030381
PD6256a	IDH2	c.419G>A	R140Q	Substitution	CMML		3	24030381
PD6256a	SRSF2	c.284C>T	P95L	Substitution	CMML		3	24030381
PD6256a	ASXL1	c.2077C>T	R693*	Substitution	CMML		3	24030381
PD6256a	RUNX1	c.896_897insA	T300fs*300	Insertion	CMML		3	24030381
PD6258a	WT1	c.1474A>C	K492Q	Substitution	MDS	RARS	3	24030381
PD6258a	SRSF2	c.284_307del24	P95_R102delPPDSHHSR	Deletion	MDS	RARS	3	24030381
PD6258a	TET2	c.2281delC	P761fs*52	Deletion	MDS	RARS	3	24030381
PD6258a	RUNX1	c.496C>T	R166*	Substitution	MDS	RARS	3	24030381
PD6259a	NF1	c.2747A>G	N916S	Substitution	MDS	RA	3	24030381
PD6259a	SF3B1	c.2098A>G	K700E	Substitution	MDS	RA	3	24030381
PD6259a	DNMT3A	c.940_941insT	W314fs*10	Insertion	MDS	RA	3	24030381
PD6261a	NRAS	c.35G>A	G12D	Substitution	CMML		3	24030381
PD6261a	TET2	c.1252_1255delCTTC	P419fs*7	Deletion	CMML		3	24030381
PD6261a	TET2	c.3646C>T	R1216*	Substitution	CMML		3	24030381
PD6262a	SF3B1	c.2098A>G	K700E	Substitution	MDS	RARS	3	24030381
PD6262a	TET2	c.5447T>G	L1816*	Substitution	MDS	RARS	3	24030381
PD6262a	TET2	c.5824C>T	Q1942*	Substitution	MDS	RARS	3	24030381
PD6263a	U2AF1	c.101C>T	S34F	Substitution	MDS	RA	3	24030381
PD6264a	SF3B1	c.2098A>G	K700E	Substitution	MDS	RA	3	24030381
PD6264a	TET2	c.3343delC	P1115fs*2	Deletion	MDS	RA	3	24030381
PD6265a	SF3B1	c.2098A>G	K700E	Substitution	MDS	RAEB	3	24030381
PD6265a	TET2	c.1776T>G	Y592*	Substitution	MDS	RAEB	3	24030381
PD6266a	TET2	c.3868T>C	S1290P	Substitution	MDS	RAEB	3	24030381
PD6266a	DNMT3A	c.1736delA	D579fs*72	Deletion	MDS	RAEB	3	24030381
PD6266a	RUNX1	c.989_990insCAGC	D332fs*269	Insertion	MDS	RAEB	3	24030381
PD6266a	TET2	c.5216_5217insT	R1739fs*14	Insertion	MDS	RAEB	3	24030381
PD6266a	U2AF1	c.101C>T	S34F	Substitution	MDS	RAEB	3	24030381
PD6268a	EZH2	c.1976delG	R659fs*16	Deletion	CMML		3	24030381
PD6268a	EZH2	c.1976G>A	R659K	Substitution	CMML		3	24030381
PD6268a	CBL	c.1212T>G	C404W	Substitution	CMML		3	24030381
PD6268a	ASXL1	c.1888_1910del23	E635fs*15	Deletion	CMML		3	24030381
PD6270a	NRAS	c.38G>T	G13V	Substitution	CMML		3	24030381
PD6270a	TET2	c.2352delT	H786fs*27	Deletion	CMML		3	24030381
PD6270a	TET2	c.2474C>G	S825*	Substitution	CMML		3	24030381
PD6270a	SRSF2	c.284C>T	P95L	Substitution	CMML		3	24030381
PD6270a	ASXL1	c.2085_2092delACTACTGC	Q695fs*20	Deletion	CMML		3	24030381
PD6271a	ASXL1	c.3377A>G	H1126R	Substitution	MDS	RAEB	3	24030381
PD6271a	GNAS	c.3035C>T	T1012I	Substitution	MDS	RAEB	3	24030381
PD6271a	IDH2	c.515G>A	R172K	Substitution	MDS	RAEB	3	24030381
PD6272a	TET2	c.1355delA	E452fs*34	Deletion	CMML		3	24030381
PD6272a	TET2	c.4138C>T	H1380Y	Substitution	CMML		3	24030381
PD6273a	TET2	c.4312A>T	K1438*	Substitution	CMML		3	24030381
PD6273a	KRAS	c.351A>C	K117N	Substitution	CMML		3	24030381
PD6274a	RUNX1	c.602G>A	R201Q	Substitution	MDS	RAEB	3	24030381
PD6274a	SRSF2	c.284C>A	P95H	Substitution	MDS	RAEB	3	24030381
PD6275a	SRSF2	c.284C>G	P95R	Substitution	MDS	RAEB	3	24030381
PD6275a	TET2	c.1399_1402delACAC	T467fs*18	Deletion	MDS	RAEB	3	24030381
PD6276a	TET2	c.4064C>T	A1355V	Substitution	CMML		3	24030381
PD6276a	TET2	c.4393C>T	R1465*	Substitution	CMML		3	24030381
PD6276a	EZH2	c.2048C>T	T683I	Substitution	CMML		3	24030381
PD6276a	EZH2	-	Coding fs	Complex InsertionDeletion	CMML		3	24030381
PD6276a	KRAS	c.351A>T	K117N	Substitution	CMML		3	24030381
PD6276a	STAG2	c.646C>T	R216*	Substitution	CMML		3	24030381
PD6277a	CBL	c.1193A>C	H398P	Substitution	CMML		3	24030381
PD6277a	CBL	c.1210T>G	C404G	Substitution	CMML		3	24030381
PD6277a	ASXL1	c.2077C>T	R693*	Substitution	CMML		3	24030381
PD6277a	RUNX1	c.251_252insC	H85fs*53	Insertion	CMML		3	24030381
PD6278a	NRAS	c.190T>A	Y64N	Substitution	MDS	RAEB	3	24030381
PD6278a	SRSF2	c.284C>A	P95H	Substitution	MDS	RAEB	3	24030381
PD6278a	ASXL1		Coding fs	Complex InsertionDeletion	MDS	RAEB	3	24030381
PD6278a	RUNX1	c.257_258insGT	G87fs*36	Insertion	MDS	RAEB	3	24030381
PD6278a	TET2	c.4154_4155insT	L1385fs*16	Insertion	MDS	RAEB	3	24030381
PD6278a	STAG2	c.3034C>T	R1012*	Substitution	MDS	RAEB	3	24030381
PD6279a	ASXL1	c.1888_1910del23	E635fs*15	Deletion	CMML		3	24030381
PD6279a	RUNX1	c.497G>A	R166Q	Substitution	CMML		3	24030381
PD6279a	RUNX1	c.56G>A	R19K	Substitution	CMML		3	24030381
PD6280a	PTPN11	c.1507G>C	G503R	Substitution	MDS	RAEB	3	24030381
PD6280a	TET2	c.5650A>G	T1884A	Substitution	MDS	RAEB	3	24030381
PD6280a	ASXL1		Coding fs	Complex InsertionDeletion	MDS	RAEB	3	24030381
PD6280a	RUNX1	c.900_901delGC	P301fs*298	Deletion	MDS	RAEB	3	24030381
PD6281a	TET2	c.1842_1843insG	L615fs*23	Insertion	CMML		3	24030381
PD6281a	TET2	c.4354C>T	R1452*	Substitution	CMML		3	24030381
PD6282a	TET2	c.3609C>G	S1203R	Substitution	CMML		3	24030381
PD6282a	TET2	c.5752G>T	E1918*	Substitution	CMML		3	24030381
PD6282a	NF1	c.4332G>C	K1444N	Substitution	CMML		3	24030381
PD6282a	SRSF2	c.284C>T	P95L	Substitution	CMML		3	24030381
PD6283a	SRSF2	c.283C>A	P95T	Substitution	CMML		3	24030381
PD6283a	U2AF1	c.470A>G	Q157R	Substitution	CMML		3	24030381
PD6284a	IDH2	c.515G>A	R172K	Substitution	MDS	RAEB	3	24030381
PD6284a	SRSF2	c.284C>T	P95L	Substitution	MDS	RAEB	3	24030381
PD6285a	TP53	c.388C>G	L130V	Substitution	MDS	RA	3	24030381
PD6286a	SRSF2	c.284C>A	P95H	Substitution	MDS	RAEB	3	24030381
PD6286a	NPM1	c.860_861insCTGC	W288fs*12	Insertion	MDS	RAEB	3	24030381
PD6287a	GNAS	c.1661G>A	G554E	Substitution	MDS	RAEB	3	24030381
PD6287a	NF1	c.4393A>T	N1465Y	Substitution	MDS	RAEB	3	24030381
PD6287a	RUNX1	c.319C>T	R107C	Substitution	MDS	RAEB	3	24030381
PD6287a	SF3B1	c.2098A>G	K700E	Substitution	MDS	RAEB	3	24030381
PD6287a	BCOR	c.2132delC	P711fs*4	Deletion	MDS	RAEB	3	24030381
PD6287a	ASXL1	c.2572C>T	Q858*	Substitution	MDS	RAEB	3	24030381
PD6288a	DNMT3A	c.2645G>A	R882H	Substitution	CMML		3	24030381
PD6288a	TET2	c.4108G>T	G1370W	Substitution	CMML		3	24030381
PD6288a	TET2	c.4393C>T	R1465*	Substitution	CMML		3	24030381
PD6288a	CEBPA	c.853T>A	Y285N	Substitution	CMML		3	24030381
PD6289a	SF3B1	c.1873C>G	R625G	Substitution	MDS	RAEB	3	24030381
PD6289a	TP53	c.817C>T	R273C	Substitution	MDS	RAEB	3	24030381
PD6293a	TP53	c.1025A>C	*342S	Substitution	MDS	RA	3	24030381
PD6295a	EZH2	c.2191T>G	Y731D	Substitution	MDS	RARS	3	24030381
PD6295a	SF3B1	c.2098A>G	K700E	Substitution	MDS	RARS	3	24030381
PD6295a	TET2	c.5885C>T	P1962L	Substitution	MDS	RARS	3	24030381
PD6295a	DNMT3A	c.2043delC	M682fs*23	Deletion	MDS	RARS	3	24030381
PD6295a	DNMT3A	c.955delA	S319fs*26	Deletion	MDS	RARS	3	24030381
PD6295a	TET2	c.4862delT	L1622fs*0	Deletion	MDS	RARS	3	24030381
PD6296a	SF3B1	c.1986C>A	H662Q	Substitution	MDS	RARS	3	24030381
PD6296a	TET2	c.1678_1679insT	K561fs*6	Insertion	MDS	RARS	3	24030381
PD6296a	TET2	c.3139delA	T1047fs*8	Deletion	MDS	RARS	3	24030381
PD6297a	GNAS	c.382_405del24	E128_T135delEPETAPTT	Deletion	MDS	RA	3	24030381
PD6298a	SF3B1	c.2098A>G	K700E	Substitution	MDS	RARS	3	24030381
PD6300a	SF3B1	c.2098A>G	K700E	Substitution	MDS	RARS	3	24030381
PD6300a	DNMT3A	c.1524_1525delCT	F509fs*36	Deletion	MDS	RARS	3	24030381
PD6301a	SRSF2	c.284C>T	P95L	Substitution	MDS	RA	3	24030381
PD6301a	TET2	c.2230C>T	Q744*	Substitution	MDS	RA	3	24030381
PD6302a	NF1	c.4549A>G	K1517E	Substitution	CMML		3	24030381
PD6303a	TET2	c.3102_3103insT	H1036fs*7	Insertion	MDS	RA	3	24030381
PD6303a	TET2	c.3105_3106insG	H1036fs*7	Insertion	MDS	RA	3	24030381
PD6303a	TET2	c.5060_5061delAG	S1688fs*4	Deletion	MDS	RA	3	24030381
PD6303a	ZRSR2	c.868C>T	R290*	Substitution	MDS	RA	3	24030381
PD6304a	SF3B1	c.2098A>G	K700E	Substitution	MDS	RARS	3	24030381
PD6305a	JAK2	c.1849G>T	V617F	Substitution	MDS	RAEB	3	24030381
PD6305a	TET2	c.5254delA	N1753fs*10	Deletion	MDS	RAEB	3	24030381
PD6305a	TP53		Coding fs	Complex InsertionDeletion	MDS	RAEB	3	24030381
PD6306a	U2AF2	c.1179G>C	E393D	Substitution	MDS	RA	3	24030381
PD6307a	GNAS	c.1886A>C	K629T	Substitution	MDS	RA	3	24030381
PD6310a	TET2	c.974_975delAA	K326fs*4	Deletion	MDS	RA	3	24030381
PD6311a	DNMT3A	c.2644C>T	R882C	Substitution	MDS	RARS	3	24030381
PD6311a	SF3B1	c.2098A>G	K700E	Substitution	MDS	RARS	3	24030381
PD6311a	TET2	c.3309delT	F1104fs*2	Deletion	MDS	RARS	3	24030381
PD6312a	SRSF2	c.284C>T	P95L	Substitution	CMML		3	24030381
PD6312a	RUNX1	c.474delT	F158fs*18	Deletion	CMML		3	24030381
PD6313a	EZH2	c.1991A>G	D664G	Substitution	MDS	RARS	3	24030381
PD6313a	NRAS	c.35G>T	G12V	Substitution	MDS	RARS	3	24030381
PD6313a	ASXL1	c.2245delC	L749fs*23	Deletion	MDS	RARS	3	24030381
PD6314a	TET2	c.3722C>A	A1241D	Substitution	MDS	RA	3	24030381
PD6314a	TET2	c.3703G>A	G1235R	Substitution	MDS	RA	3	24030381
PD6315a	SF3B1	c.2098A>G	K700E	Substitution	MDS	RARS	3	24030381
PD6317a	GNAS	c.2167G>A	A723T	Substitution	MDS	RAEB	3	24030381
PD6318a	RUNX1	c.314A>T	H105L	Substitution	MDS	RA	3	24030381
PD6318a	SRSF2	c.284C>G	P95R	Substitution	MDS	RA	3	24030381
PD6320a	TET2	c.4138C>T	H1380Y	Substitution	CMML		3	24030381
PD6320a	SRSF2	c.284C>G	P95R	Substitution	CMML		3	24030381
PD6322a	ETV6	c.1106G>A	R369Q	Substitution	MDS	RA	3	24030381
PD6325a	TET2	c.4128C>A	D1376E	Substitution	MDS	RAEB	3	24030381
PD6325a	TET2	c.5651C>T	T1884I	Substitution	MDS	RAEB	3	24030381
PD6325a	ASXL1	c.1773C>A	Y591*	Substitution	MDS	RAEB	3	24030381
PD6328a	SRSF2	c.284C>G	P95R	Substitution	MDS	RAEB	3	24030381
PD6329a	RUNX1	c.478G>T	D160Y	Substitution	MDS	RA	3	24030381
PD6329a	SF3B1	c.1774G>A	E592K	Substitution	MDS	RA	3	24030381
PD6329a	ASXL1	c.3512delG	A1172fs*2	Deletion	MDS	RA	3	24030381
PD6332a	TET2	c.4402_4403delAA	K1468fs*9	Deletion	CMML		3	24030381
PD6332a	JAK2	c.1459C>T	R487C	Substitution	CMML		3	24030381
PD6333a	SF3B1	c.2098A>G	K700E	Substitution	MDS	RARS	3	24030381
PD6334a	TET2	c.3821_3822delAG	Q1274fs*25	Deletion	CMML		3	24030381
PD6334a	TET2	c.4160A>T	N1387I	Substitution	CMML		3	24030381
PD6335a	PTPN11	c.205G>A	E69K	Substitution	CMML		3	24030381
PD6335a	SRSF2	c.284C>A	P95H	Substitution	CMML		3	24030381
PD6338a	JAK2	c.2696T>C	I899T	Substitution	MDS	RARS	3	24030381
PD6338a	JAK2	c.1849G>T	V617F	Substitution	MDS	RARS	3	24030381
PD6338a	SF3B1	c.2098A>G	K700E	Substitution	MDS	RARS	3	24030381
PD6339a	JAK2	c.1849G>T	V617F	Substitution	MDS	RARS	3	24030381
PD6339a	TET2	c.3119_3120insA	F1041fs*2	Insertion	MDS	RARS	3	24030381
PD6474a	IDH2	c.419G>A	R140Q	Substitution	CMML		3	24030381
PD6474a	TP53	c.997C>T	R333C	Substitution	CMML		3	24030381
PD6474a	ASXL1	c.1438G>T	E480*	Substitution	CMML		3	24030381
PD6474a	U2AF1	c.470A>G	Q157R	Substitution	CMML		3	24030381
PD6475a	KRAS	c.37G>T	G13C	Substitution	CMML		3	24030381
PD6476a	SF3B1	c.2098A>G	K700E	Substitution	MDS	RA	3	24030381
PD6477a	NF1	c.2798T>C	L933P	Substitution	CMML		3	24030381
PD6477a	SRSF2	c.284C>A	P95H	Substitution	CMML		3	24030381
PD6477a	ASXL1	c.2077C>T	R693*	Substitution	CMML		3	24030381
PD6478a	SF3B1	c.2098A>G	K700E	Substitution	MDS	RA	3	24030381
PD6479a	TET2	c.3863G>A	G1288D	Substitution	CMML		3	24030381
PD6479a	KRAS	c.437C>T	A146V	Substitution	CMML		3	24030381
PD6479a	NF1	c.2918A>C	D973A	Substitution	CMML		3	24030381
PD6480a	TET2	c.2746C>T	Q916*	Substitution	MDS	RAEB	3	24030381
PD6481a	RUNX1	c.422C>T	S141L	Substitution	MDS	RAEB	3	24030381
PD6481a	SF3B1	c.1998G>C	K666N	Substitution	MDS	RAEB	3	24030381
PD6481a	ZRSR2	c.121G>C	G41R	Substitution	MDS	RAEB	3	24030381
PD6482a	DNMT3A	c.2645G>A	R882H	Substitution	MDS	RARS	3	24030381
PD6482a	SF3B1	c.1866G>C	E622D	Substitution	MDS	RARS	3	24030381
PD6483a	SF3B1	c.2098A>G	K700E	Substitution	MDS	RARS	3	24030381
PD6484a	PHF6	c.418G>A	A140T	Substitution	MDS	RAEB	3	24030381
PD6484a	RUNX1	c.611G>A	R204Q	Substitution	MDS	RAEB	3	24030381
PD6484a	ASXL1	c.1926_1927insA	G643fs*15	Insertion	MDS	RAEB	3	24030381
PD6484a	TET2	c.4662_4663delAG	E1555fs*22	Deletion	MDS	RAEB	3	24030381
PD6484a	TET2	c.1630C>T	R544*	Substitution	MDS	RAEB	3	24030381
PD6484a	U2AF1	c.470A>C	Q157P	Substitution	MDS	RAEB	3	24030381
PD6485a	TET2	c.1558G>A	G520S	Substitution	MDS	RA	3	24030381
PD6485a	U2AF1	c.101C>T	S34F	Substitution	MDS	RA	3	24030381
PD6486a	ASXL1	c.2185_2188delAGCT	S729fs*14	Deletion	MDS	RA	3	24030381
PD6488a	SRSF2	c.284C>T	P95L	Substitution	MDS	RA	3	24030381
PD6488a	ASXL1	c.3635delC	L1213fs*4	Deletion	MDS	RA	3	24030381
PD6490a	SF3B1	c.1866G>T	E622D	Substitution	MDS	RARS	3	24030381
PD6491a	IDH2	c.419G>A	R140Q	Substitution	MDS	RA	3	24030381
PD6491a	SRSF2	c.284_307del24	P95_R102delPPDSHHSR	Deletion	MDS	RA	3	24030381
PD6492a	SF3B1	c.1866G>T	E622D	Substitution	MDS	RARS	3	24030381
PD6492a	ASXL1	c.1888_1910del23	E635fs*15	Deletion	MDS	RARS	3	24030381
PD6492a	GATA2	c.1168_1170delAAG	K390delK	Deletion	MDS	RARS	3	24030381
PD6495a	DNMT3A	c.805_806insG	A269fs*12	Insertion	MDS	5q-	3	24030381
PD6496a	ASXL1	c.1934_1935insG	G646fs*12	Insertion	MDS	RA	3	24030381
PD6496a	U2AF1	c.101C>T	S34F	Substitution	MDS	RA	3	24030381
PD6497a	SF3B1	c.2098A>G	K700E	Substitution	MDS	RARS	3	24030381
PD6498a	SF3B1	c.1997A>G	K666R	Substitution	MDS	RARS	3	24030381
PD6498a	TET2	c.3929A>C	K1310T	Substitution	MDS	RARS	3	24030381
PD6499a	SRSF2	c.284C>G	P95R	Substitution	MDS	RARS	3	24030381
PD6499a	TET2	c.4546C>T	R1516*	Substitution	MDS	RARS	3	24030381
PD6499a	TET2	c.3157C>T	Q1053*	Substitution	MDS	RARS	3	24030381
PD6500a	CBL	c.1211G>A	C404Y	Substitution	MDS	RCMD-RS	3	24030381
PD6500a	SF3B1	c.2101G>T	V701F	Substitution	MDS	RCMD-RS	3	24030381
PD6501a	SF3B1	c.1986C>G	H662Q	Substitution	MDS	RA	3	24030381
PD6502a	TP53	c.586C>T	R196*	Substitution	MDS	RA	3	24030381
PD6502a	U2AF1	c.470A>C	Q157P	Substitution	MDS	RA	3	24030381
PD6503a	TET2	c.3379delC	Q1127fs*10	Deletion	MDS	RA	3	24030381
PD6504a	SF3B1	c.1998G>C	K666N	Substitution	MDS	RARS	3	24030381
PD6504a	SRSF2	c.284C>G	P95R	Substitution	MDS	RARS	3	24030381
PD6504a	TET2	c.1300C>T	H434Y	Substitution	MDS	RARS	3	24030381
PD6504a	TET2	c.1164delT	K389fs*38	Deletion	MDS	RARS	3	24030381
PD6504a	STAG2	c.2111C>G	S704*	Substitution	MDS	RARS	3	24030381
PD6506a	IDH2	c.419G>A	R140Q	Substitution	MDS	RA	3	24030381
PD6506a	PHF6	c.821G>A	R274Q	Substitution	MDS	RA	3	24030381
PD6506a	ASXL1	c.1888_1910del23	E635fs*15	Deletion	MDS	RA	3	24030381
PD6506a	TP53	c.759delC	I254fs*91	Deletion	MDS	RA	3	24030381
PD6506a	U2AF1	c.470A>C	Q157P	Substitution	MDS	RA	3	24030381
PD6507a	SF3B1	c.1997A>C	K666T	Substitution	MDS	RA	3	24030381
PD6507a	TET2	c.2320T>A	S774T	Substitution	MDS	RA	3	24030381
PD6509a	STAG2	c.670A>G	M224V	Substitution	MDS	RA	3	24030381
PD6510a	TET2	c.1742_1743insA	N582fs*0	Insertion	MDS	RCMD	3	24030381
PD6510a	ZRSR2	c.883C>T	R295*	Substitution	MDS	RCMD	3	24030381
PD6511a	SF3B1	c.1873C>T	R625C	Substitution	MDS	RA	3	24030381
PD6513a	TET2	c.4136C>T	A1379V	Substitution	MDS	RCMD	3	24030381
PD6513a	RUNX1	c.911_912insT	G305fs*295	Insertion	MDS	RCMD	3	24030381
PD6513a	RUNX1	c.1096_1103delATCGGCAT	I366fs*231	Deletion	MDS	RCMD	3	24030381
PD6513a	ZRSR2	c.859delT	F287fs*18	Deletion	MDS	RCMD	3	24030381
PD6514a	IDH1	c.395G>A	R132H	Substitution	MDS	RA	3	24030381
PD6514a	SF3B1	c.1774G>A	E592K	Substitution	MDS	RA	3	24030381
PD6514a	ASXL1	c.1934_1935insG	G646fs*12	Insertion	MDS	RA	3	24030381
PD6515a	U2AF1	c.470A>C	Q157P	Substitution	MDS	RA	3	24030381
PD6516a	SRSF2	c.284C>T	P95L	Substitution	MDS	RCMD	3	24030381
PD6516a	TET2	c.4133G>A	C1378Y	Substitution	MDS	RCMD	3	24030381
PD6517a	IDH1	c.395G>A	R132H	Substitution	CMML		3	24030381
PD6517a	TET2	c.847G>T	E283*	Substitution	CMML		3	24030381
PD6517a	TET2	c.4249G>T	V1417F	Substitution	CMML		3	24030381
PD6517a	JAK2	c.1849G>T	V617F	Substitution	CMML		3	24030381
PD6517a	ASXL1	c.1934_1935insG	G646fs*12	Insertion	CMML		3	24030381
PD6518a	SF3B1	c.2098A>G	K700E	Substitution	MDS	RCMD-RS	3	24030381
PD6520a	DNMT3A	c.2645G>A	R882H	Substitution	MDS	RA	3	24030381
PD6520a	IDH1	c.395G>A	R132H	Substitution	MDS	RA	3	24030381
PD6520a	SRSF2	c.284C>A	P95H	Substitution	MDS	RA	3	24030381
PD6521a	SF3B1	c.1874G>T	R625L	Substitution	MDS	RA	3	24030381
PD6521a	TET2	c.2474delC	S825fs*0	Deletion	MDS	RA	3	24030381
PD6522a	SF3B1	c.2098A>G	K700E	Substitution	MDS	RARS	3	24030381
PD6522a	TP53	c.659A>G	Y220C	Substitution	MDS	RARS	3	24030381
PD6522a	TET2	c.4541delT	L1515fs*56	Deletion	MDS	RARS	3	24030381
PD6523a	DNMT3A	c.1415delA	D472fs*179	Deletion	CMML		3	24030381
PD6523a	TET2	c.3523A>T	I1175F	Substitution	CMML		3	24030381
PD6523a	TET2	c.3965T>A	L1322Q	Substitution	CMML		3	24030381
PD6523a	SRSF2	c.284C>T	P95L	Substitution	CMML		3	24030381
PD6523a	GNAS	c.1873A>G	S625G	Substitution	CMML		3	24030381
PD6527a	TET2	c.4191delT	L1398fs*50	Deletion	CMML		3	24030381
PD6527a	TET2	c.5119_5120insGCAG	S1708fs*6	Insertion	CMML		3	24030381
PD6527a	SRSF2	c.284C>G	P95R	Substitution	CMML		3	24030381
PD6530a	TET2	c.1683_1684insAA	P562fs*7	Insertion	MDS	RCMD	3	24030381
PD6534a	TET2	c.944delC	Q317fs*30	Deletion	MDS	RCMD	3	24030381
PD6534a	ASXL1	c.2278C>T	Q760*	Substitution	MDS	RCMD	3	24030381
PD6534a	PHF6	c.955C>T	R319*	Substitution	MDS	RCMD	3	24030381
PD6534a	U2AF1	c.470A>C	Q157P	Substitution	MDS	RCMD	3	24030381
PD6536a	PHF6	c.596C>G	S199C	Substitution	MDS	RARS	3	24030381
PD6536a	SF3B1	c.2098A>G	K700E	Substitution	MDS	RARS	3	24030381
PD6537a	TET2	c.3898T>A	F1300I	Substitution	CMML		3	24030381
PD6537a	CBL	c.793C>T	H265Y	Substitution	CMML		3	24030381
PD6537a	ZRSR2	c.932delT	C312fs*>177	Deletion	CMML		3	24030381
PD6538a	DNMT3A	c.2206C>T	R736C	Substitution	MDS	RARS	3	24030381
PD6538a	SF3B1	c.2098A>G	K700E	Substitution	MDS	RARS	3	24030381
PD6539a	EZH2	c.437T>A	I146N	Substitution	MDS	RCMD	3	24030381
PD6539a	ASXL1	c.2201delG	A735fs*9	Deletion	MDS	RCMD	3	24030381
PD6539a	TET2	c.2533delA	E846fs*27	Deletion	MDS	RCMD	3	24030381
PD6539a	TET2	c.3160delG	V1054fs*0	Deletion	MDS	RCMD	3	24030381
PD6539a	TET2	c.2509delA	N837fs*4	Deletion	MDS	RCMD	3	24030381
PD6539a	U2AF1	c.470A>C	Q157P	Substitution	MDS	RCMD	3	24030381
PD6540a	DNMT3A	c.2207G>A	R736H	Substitution	MDS	RARS	3	24030381
PD6540a	SF3B1	c.2098A>G	K700E	Substitution	MDS	RARS	3	24030381
PD6543a	CBL	c.1139T>G	L380R	Substitution	MDS	RCMD	3	24030381
PD6543a	NF1	c.2533T>C	C845R	Substitution	MDS	RCMD	3	24030381
PD6544a	ZRSR2	c.934T>C	C312R	Substitution	MDS	RA	3	24030381
PD6545a	TET2	c.1648C>T	R550*	Substitution	CMML		3	24030381
PD6545a	TET2	c.3844G>C	G1282R	Substitution	CMML		3	24030381
PD6545a	SRSF2	c.284C>A	P95H	Substitution	CMML		3	24030381
PD6545a	ASXL1	c.1934_1935insG	G646fs*12	Insertion	CMML		3	24030381
PD6779a	EZH2	c.2152_2153delAA	K718fs*12	Deletion	sAML	AML-MDS	3	24030381
PD6779a	GATA2	c.1168_1170delAAG	K390delK	Deletion	sAML	AML-MDS	3	24030381
PD6779a	SF3B1	c.2098A>G	K700E	Substitution	sAML	AML-MDS	3	24030381
PD6779a	STAG2	c.3700G>A	D1234N	Substitution	sAML	AML-MDS	3	24030381
PD6779a	TET2	c.2277_2278delTT	F760fs*8	Deletion	sAML	AML-MDS	3	24030381
PD6780a	CBL	c.1276A>C	T426P	Substitution	MDS	RCMD-RS	3	24030381
PD6780a	U2AF1	c.470A>G	Q157R	Substitution	MDS	RCMD-RS	3	24030381
PD6781a	ZRSR2	c.1020G>A	W340*	Substitution	MDS	RCMD	3	24030381
PD6782a	FLT3	c.215C>T	S72L	Substitution	MDS	RA	3	24030381
PD6782a	ASXL1	c.1934_1935insG	G646fs*12	Insertion	MDS	RA	3	24030381
PD6783a	ASXL1	c.2467delT	L823fs*0	Deletion	sAML	AML-MDS	3	24030381
PD6783a	BCOR	c.4936_4937insC	L1646fs*6	Insertion	sAML	AML-MDS	3	24030381
PD6783a	KIT	c.91C>T	P31S	Substitution	sAML	AML-MDS	3	24030381
PD6783a	RUNX1	c.338C>A	P113H	Substitution	sAML	AML-MDS	3	24030381
PD6783a	SRSF2	c.284C>T	P95L	Substitution	sAML	AML-MDS	3	24030381
PD6783a	STAG2	c.1165C>T	Q389*	Substitution	sAML	AML-MDS	3	24030381
PD6784a	ASXL1	c.4069G>A	A1357T	Substitution	CMML		3	24030381
PD6785a	EZH2	c.1876G>A	V626M	Substitution	MDS	RAEB	3	24030381
PD6785a	ASXL1	c.1888_1910del23	E635fs*15	Deletion	MDS	RAEB	3	24030381
PD6785a	PHF6	c.69_70insA	R24fs*12	Insertion	MDS	RAEB	3	24030381
PD6786a	SRSF2	c.284C>A	P95H	Substitution	MDS	RCMD	3	24030381
PD6786a	ASXL1	c.2338C>T	Q780*	Substitution	MDS	RCMD	3	24030381
PD6787a	TET2	c.311delC	S104fs*9	Deletion	CMML		3	24030381
PD6787a	TET2	c.2068C>T	Q690*	Substitution	CMML		3	24030381
PD6787a	CBL	c.638_639insA	H213fs*17	Insertion	CMML		3	24030381
PD6787a	CBL	c.1211G>A	C404Y	Substitution	CMML		3	24030381
PD6787a	ZRSR2	c.703C>T	Q235*	Substitution	CMML		3	24030381
PD6788a	PTPN11	c.214G>A	A72T	Substitution	MDS	RAEB	3	24030381
PD6788a	PTPN11	c.1505C>T	S502L	Substitution	MDS	RAEB	3	24030381
PD6789a	TET2	c.4210C>T	R1404*	Substitution	CMML		3	24030381
PD6789a	TET2	c.4546C>T	R1516*	Substitution	CMML		3	24030381
PD6789a	TET2	c.5108_5109insG	D1704fs*9	Insertion	CMML		3	24030381
PD6789a	PTPN11	c.922A>G	N308D	Substitution	CMML		3	24030381
PD6789a	SRSF2	c.284C>A	P95H	Substitution	CMML		3	24030381
PD6789a	ASXL1	c.2422delC	P808fs*10	Deletion	CMML		3	24030381
PD6791a	TET2	c.2020C>T	Q674*	Substitution	MDS	RCMD	3	24030381
PD6791a	TET2	c.2746C>T	Q916*	Substitution	MDS	RCMD	3	24030381
PD6791a	ZRSR2	c.1119C>G	Y373*	Substitution	MDS	RCMD	3	24030381
PD6792a	IDH2	c.475C>G	R159G	Substitution	MDS	RCMD	3	24030381
PD6793a	TET2	c.2309_2310delAA	E772fs*8	Deletion	CMML		3	24030381
PD6793a	JAK2	c.2768G>A	R923H	Substitution	CMML		3	24030381
PD6793a	CBL	c.1259G>A	R420Q	Substitution	CMML		3	24030381
PD6793a	ASXL1	c.1888_1910del23	E635fs*15	Deletion	CMML		3	24030381
PD6795a	U2AF2	c.569_583delAGATTAACCAGGACA	I191_K195delINQDK	Deletion	CMML		3	24030381
PD6796a	SF3B1	c.2098A>G	K700E	Substitution	MDS	RCMD-RS	3	24030381
PD6797a	IDH2	c.419G>A	R140Q	Substitution	sAML	AML-MDS	3	24030381
PD6797a	SRSF2	c.284C>A	P95H	Substitution	sAML	AML-MDS	3	24030381
PD6799a	DNMT3A	c.793G>T	V265L	Substitution	MDS	RCMD	3	24030381
PD6799a	TET2	c.3715_3716delTC	L1240fs*2	Deletion	MDS	RCMD	3	24030381
PD6800a	SRSF2	c.284C>A	P95H	Substitution	MDS	RA	3	24030381
PD6803a	BCOR	c.4099C>G	H1367D	Substitution	MDS	RCMD	3	24030381
PD6803a	GNAS	c.2255C>T	A752V	Substitution	MDS	RCMD	3	24030381
PD6803a	IDH1	c.791G>A	G264D	Substitution	MDS	RCMD	3	24030381
PD6803a	NF1	c.6745C>T	L2249F	Substitution	MDS	RCMD	3	24030381
PD6803a	TET2	c.3514G>A	G1172S	Substitution	MDS	RCMD	3	24030381
PD6806a	TP53	c.142G>A	D48N	Substitution	MDS	RA	3	24030381
PD6806a	EZH2	c.1114_1115insC	T374fs*3	Insertion	MDS	RA	3	24030381
PD6807a	TET2	c.3263C>A	S1088*	Substitution	CMML		3	24030381
PD6807a	TET2	c.3730_3731delCT	Y1245fs*22	Deletion	CMML		3	24030381
PD6807a	JAK2	c.1849G>T	V617F	Substitution	CMML		3	24030381
PD6807a	SRSF2	c.284C>A	P95H	Substitution	CMML		3	24030381
PD6807a	ASXL1	c.2638_2639insA	T880fs*2	Insertion	CMML		3	24030381
PD6808a	TET2	c.3863G>T	G1288V	Substitution	CMML		3	24030381
PD6808a	TET2	c.3965T>G	L1322R	Substitution	CMML		3	24030381
PD6808a	ZRSR2	c.225G>A	W75*	Substitution	CMML		3	24030381
PD6809a	BCOR	c.3649C>T	R1217*	Substitution	sAML	AML-MDS	3	24030381
PD6809a	BRAF	c.1258C>T	P420S	Substitution	sAML	AML-MDS	3	24030381
PD6809a	ETV6	c.450_451insA	N151fs*3	Insertion	sAML	AML-MDS	3	24030381
PD6809a	SRSF2	c.283C>A	P95T	Substitution	sAML	AML-MDS	3	24030381
PD6810a	NF1	c.905G>A	S302N	Substitution	MDS	5q-	3	24030381
PD6812a	SF3B1	c.2098A>G	K700E	Substitution	CMML		3	24030381
PD6812a	TET2	c.675delC	L226fs*24	Deletion	CMML		3	24030381
PD6812a	ASXL1	c.1934_1935insG	G646fs*12	Insertion	CMML		3	24030381
PD6812a	STAG2	c.2753_2754insA	L919fs*10	Insertion	CMML		3	24030381
PD6815a	EZH2	c.965A>G	N322S	Substitution	MDS	RCMD	3	24030381
PD6818a	KIT	c.2792G>T	S931I	Substitution	MDS	RA	3	24030381
PD6818a	TP53	c.742C>T	R248W	Substitution	MDS	RA	3	24030381
PD6819a	TET2	c.2165_2166insA	P723fs*3	Insertion	CMML		3	24030381
PD6819a	TET2	c.4735_4736insA	Y1579fs*0	Insertion	CMML		3	24030381
PD6819a	SRSF2	c.284C>A	P95H	Substitution	CMML		3	24030381
PD6821a	SRSF2	c.284C>A	P95H	Substitution	MDS	RCMD	3	24030381
PD6821a	RUNX1	c.610C>T	R204*	Substitution	MDS	RCMD	3	24030381
PD6822a	GNAS	c.340G>A	E114K	Substitution	MDS	RCMD	3	24030381
PD6822a	NF1	c.6290C>T	A2097V	Substitution	MDS	RCMD	3	24030381
PD6822a	TET2	c.2810delA	H937fs*16	Deletion	MDS	RCMD	3	24030381
PD6823a	BCOR	c.3365C>T	S1122L	Substitution	sAML	AML-MDS	3	24030381
PD6823a	IDH1	c.395G>A	R132H	Substitution	sAML	AML-MDS	3	24030381
PD6823a	SRSF2	c.284C>T	P95H	Substitution	sAML	AML-MDS	3	24030381
PD6823a	STAG2	c.1382T>G	V461G	Substitution	sAML	AML-MDS	3	24030381
PD6824a	STAG2	c.1709C>T	A570V	Substitution	MDS	RCMD	3	24030381
PD6824a	ASXL1	c.1934_1935insG	G646fs*12	Insertion	MDS	RCMD	3	24030381
PD6824a	BCOR	c.2514_2515insC	K839fs*5	Insertion	MDS	RCMD	3	24030381
PD6826a	IDH2	c.419G>A	R140Q	Substitution	MDS	RARS	3	24030381
PD6826a	SF3B1	c.2098A>G	K700E	Substitution	MDS	RARS	3	24030381
PD6826a	TET2	c.4735_4736insA	Y1579fs*0	Insertion	MDS	RARS	3	24030381
PD6828a	SF3B1	c.2098A>G	K700E	Substitution	MDS	RARS	3	24030381
PD6829a	SF3B1	c.2098A>G	K700E	Substitution	MDS	RAEB	3	24030381
PD6829a	RUNX1	c.865G>T	G289*	Substitution	MDS	RAEB	3	24030381
PD6830a	SF3B1	c.1996A>C	K666Q	Substitution	sAML	AML-MDS	3	24030381
PD6830a	SRSF2	c.283C>A	P95T	Substitution	sAML	AML-MDS	3	24030381
PD6831a	ASXL1	c.1123G>A	V375M	Substitution	MDS	RAEB	3	24030381
PD6831a	SF3B1	c.2098A>G	K700E	Substitution	MDS	RAEB	3	24030381
PD6831a	TP53	c.641A>G	H214R	Substitution	MDS	RAEB	3	24030381
PD6834a	SRSF2	c.284C>A	P95H	Substitution	MDS	RCMD	3	24030381
PD6834a	TET2	c.3632G>A	C1211Y	Substitution	MDS	RCMD	3	24030381
PD6834a	TET2	c.4786delA	N1596fs*14	Deletion	MDS	RCMD	3	24030381
PD6836a	U2AF2	c.1043_1044insC	S349fs*28	Insertion	sAML	AML-MDS	3	24030381
PD6837a	SF3B1	c.2098A>G	K700E	Substitution	MDS	5q-	3	24030381
PD6839a	SF3B1	c.2098A>G	K700E	Substitution	MDS	5q-	3	24030381
PD6841a	DNMT3A	c.1097G>C	R366P	Substitution	MDS	RAEB	3	24030381
PD6841a	IDH1	c.647T>A	L216Q	Substitution	MDS	RAEB	3	24030381
PD6841a	TET2	c.3662G>A	C1221Y	Substitution	MDS	RAEB	3	24030381
PD6841a	TET2	c.4133G>A	C1378Y	Substitution	MDS	RAEB	3	24030381
PD6841a	BCOR	c.1005_1006insC	S336fs*45	Insertion	MDS	RAEB	3	24030381
PD6842a	TET2	c.5556delG	S1853fs*34	Deletion	CMML		3	24030381
PD6842a	SRSF2	c.284C>G	P95R	Substitution	CMML		3	24030381
PD6843a	EZH2	c.434T>C	F145S	Substitution	MDS	RCMD	3	24030381
PD6843a	EZH2	c.2191T>A	Y731N	Substitution	MDS	RCMD	3	24030381
PD6843a	ZRSR2	c.88delC	R30fs*8	Deletion	MDS	RCMD	3	24030381
PD6843a	ASXL1	c.1225A>T	K409*	Substitution	MDS	RCMD	3	24030381
PD6845a	TET2	c.4178C>T	T1393I	Substitution	MDS	5q-	3	24030381
PD6847a	EZH2	c.458A>G	Y153C	Substitution	MDS	RAEB1	3	24030381
PD6848a	TET2	c.4393C>T	R1465*	Substitution	CMML		3	24030381
PD6848a	TET2	c.4816delG	G1606fs*4	Deletion	CMML		3	24030381
PD6848a	CBL	c.562G>T	E188*	Substitution	CMML		3	24030381
PD6848a	ZRSR2	c.1094delA	E365fs*>124	Deletion	CMML		3	24030381
PD6849a	CEBPA	c.232delC	L78fs*82	Deletion	sAML	AML-MDS	3	24030381
PD6849a	DNMT3A	c.2645G>A	R882H	Substitution	sAML	AML-MDS	3	24030381
PD6849a	NPM1	c.863_864insTCTG	W288fs*12	Insertion	sAML	AML-MDS	3	24030381
PD6849a	TET2	c.4473delG	E1492fs*79	Deletion	sAML	AML-MDS	3	24030381
PD6850a	SF3B1	c.2098A>G	K700E	Substitution	MDS	RCMD-RS	3	24030381
PD6850a	DNMT3A	c.2189delT	L730fs*49	Deletion	MDS	RCMD-RS	3	24030381
PD6850a	TET2	c.220delG	V74fs*0	Deletion	MDS	RCMD-RS	3	24030381
PD6853a	IDH2	c.419G>A	R140Q	Substitution	sAML	AML-MDS	3	24030381
PD6853a	U2AF1	c.470A>C	Q157P	Substitution	sAML	AML-MDS	3	24030381
PD6854a	ASXL1	c.3518T>C	L1173S	Substitution	sAML	AML-MDS	3	24030381
PD6854a	WT1	c.1109_1110insGTCC	V371fs*15	Insertion	sAML	AML-MDS	3	24030381
PD6855a	ETV6	c.1106G>A	R369Q	Substitution	MDS	RA	3	24030381
PD6855a	GNAS	c.2531G>A	R844H	Substitution	MDS	RA	3	24030381
PD6855a	SRSF2	c.284C>T	P95L	Substitution	MDS	RA	3	24030381
PD6857a	SRSF2	c.284C>T	P95L	Substitution	CMML		3	24030381
PD6857a	RUNX1	c.1111_1112insT	M371fs*229	Insertion	CMML		3	24030381
PD6861a	DNMT3A	c.2645G>A	R882H	Substitution	sAML	AML-MDS	3	24030381
PD6861a	GATA2	c.1151G>A	R384K	Substitution	sAML	AML-MDS	3	24030381
PD6861a	NPM1	c.863_864insTCTG	W288fs*12	Insertion	sAML	AML-MDS	3	24030381
PD6862a	DNMT3A	c.2546C>T	P849L	Substitution	MDS	RCMD	3	24030381
PD6862a	TP53	c.841G>T	D281Y	Substitution	MDS	RCMD	3	24030381
PD6862a	TP53	c.752_753insT	L252fs*12	Insertion	MDS	RCMD	3	24030381
PD6862a	EZH2	c.1708C>T	Q570*	Substitution	MDS	RCMD	3	24030381
PD6864a	JAK2	c.365G>A	R122H	Substitution	MDS	RCMD	3	24030381
PD6869a	DNMT3A	c.1309delA	T437fs*214	Deletion	sAML	AML-MDS	3	24030381
PD6869a	GATA2	c.1114G>A	A372T	Substitution	sAML	AML-MDS	3	24030381
PD6869a	NPM1	c.863_864insCATG	W288fs*12	Insertion	sAML	AML-MDS	3	24030381
PD6869a	NRAS	c.35G>A	G12D	Substitution	sAML	AML-MDS	3	24030381
PD6869a	WT1	c.1128_1129insACTCTTGT	R380fs*72	Insertion	sAML	AML-MDS	3	24030381
PD6872a	TET2	c.1103delA	E368fs*4	Deletion	MDS	RCMD	3	24030381
PD6872a	ZRSR2	c.368delA	E123fs*42	Deletion	MDS	RCMD	3	24030381
PD6872a	TET2	c.4824T>G	Y1608*	Substitution	MDS	RCMD	3	24030381
PD6875a	SF3B1	c.2098A>G	K700E	Substitution	MDS	RARS	3	24030381
PD6876a	TET2	c.2896C>T	Q966*	Substitution	CMML		3	24030381
PD6876a	TET2	c.3569C>A	S1190Y	Substitution	CMML		3	24030381
PD6876a	CBL	c.770A>G	N257S	Substitution	CMML		3	24030381
PD6876a	KRAS	c.178G>C	G60R	Substitution	CMML		3	24030381
PD6876a	SRSF2	c.284C>T	P95L	Substitution	CMML		3	24030381
PD6877a	SRSF2	c.284C>T	P95L	Substitution	MDS	RARS	3	24030381
PD6877a	TET2	c.650delC	V218fs*32	Deletion	MDS	RARS	3	24030381
PD6877a	TET2	c.1588C>T	Q530*	Substitution	MDS	RARS	3	24030381
PD6883a	KIT	c.50T>C	L17P	Substitution	MDS	RCMD	3	24030381
PD6883a	SRSF2	c.284C>T	P95L	Substitution	MDS	RCMD	3	24030381
PD6883a	TET2	c.2068C>T	Q690*	Substitution	MDS	RCMD	3	24030381
PD6884a	GATA2	c.890A>G	N297S	Substitution	MDS	RAEB	3	24030381
PD6884a	GATA2	c.950A>G	N317S	Substitution	MDS	RAEB	3	24030381
PD6884a	PTPN11	c.215C>T	A72V	Substitution	MDS	RAEB	3	24030381
PD6884a	SF3B1	c.1998G>C	K666N	Substitution	MDS	RAEB	3	24030381
PD6887a	IDH1	c.394C>T	R132C	Substitution	MDS	RAEB	3	24030381
PD6887a	NRAS	c.34G>C	G12R	Substitution	MDS	RAEB	3	24030381
PD6887a	SRSF2	c.284C>G	P95R	Substitution	MDS	RAEB	3	24030381
PD6888a	SF3B1	c.3670C>A	P1224T	Substitution	MDS	RCMD	3	24030381
PD6889a	TET2	c.1249C>T	Q417*	Substitution	CMML		3	24030381
PD6890a	ETV6	c.1057C>T	R353W	Substitution	MDS	RCMD	3	24030381
PD6890a	PHF6	c.865A>G	T289A	Substitution	MDS	RCMD	3	24030381
PD6890a	ASXL1	c.1210C>T	R404*	Substitution	MDS	RCMD	3	24030381
PD6894a	DNMT3A	c.2110G>A	V704M	Substitution	MDS	RAEB	3	24030381
PD6894a	EZH2	c.2069G>A	R690H	Substitution	MDS	RAEB	3	24030381
PD6894a	KRAS	c.35G>T	G12V	Substitution	MDS	RAEB	3	24030381
PD6894a	RUNX1	c.744G>A	W248*	Substitution	MDS	RAEB	3	24030381
PD6896a	DNMT3A	c.1000_1007delGGCAAATT	G334fs*6	Deletion	MDS	RCMD	3	24030381
PD6898a	CBL	c.1142G>A	C381Y	Substitution	MDS	RCMD	3	24030381
PD6898a	GNAS	c.412G>A	E138K	Substitution	MDS	RCMD	3	24030381
PD6898a	TET2	c.4018_4019insT	A1341fs*3	Insertion	MDS	RCMD	3	24030381
PD6898a	TET2	c.4767delT	Y1589fs*0	Deletion	MDS	RCMD	3	24030381
PD6903a	U2AF1	c.101C>T	S34F	Substitution	MDS	RCMD	3	24030381
PD6904a	IDH2	c.419G>A	R140Q	Substitution	sAML	AML-MDS	3	24030381
PD6904a	NRAS	c.38G>T	G13V	Substitution	sAML	AML-MDS	3	24030381
PD6906a	TP53	c.615T>A	Y205*	Substitution	sAML	AML-MDS	3	24030381
PD6907a	TP53	c.646G>A	V216M	Substitution	MDS	RAEB	3	24030381
PD6909a	DNMT3A	c.2644C>T	R882C	Substitution	MDS	RCMD	3	24030381
PD6909a	ETV6	c.1130C>T	A377V	Substitution	MDS	RCMD	3	24030381
PD6909a	U2AF1	c.470A>C	Q157P	Substitution	MDS	RCMD	3	24030381
PD6913a	KRAS	c.35G>A	G12D	Substitution	CMML		3	24030381
PD6914a	ASXL1	c.4127_4128insG	P1377fs*3	Insertion	MDS	RAEB	3	24030381
PD6914a	STAG2	c.1701_1702insT	A568fs*20	Insertion	MDS	RAEB	3	24030381
PD6916a	GNAS	c.704C>T	S235F	Substitution	MDS	RA	3	24030381
PD6917a	BCOR	c.1435G>A	G479R	Substitution	MDS	RAEB	3	24030381
PD6917a	NF1	c.4962T>A	F1654L	Substitution	MDS	RAEB	3	24030381
PD6918a	SF3B1	c.1997A>G	K666R	Substitution	MDS	RARS	3	24030381
PD6920a	TET2	c.329A>G	K110R	Substitution	MDS	RCMD	3	24030381
PD6920a	DNMT3A	c.1367_1368delAG	K456fs*16	Deletion	MDS	RCMD	3	24030381
PD6921a	ASXL1	c.1488C>G	N496K	Substitution	MDS	RA	3	24030381
PD6922a	ASXL1	c.1888_1910del23	E635fs*15	Deletion	sAML	AML-MDS	3	24030381
PD6922a	NF1	c.5608C>T	R1870W	Substitution	sAML	AML-MDS	3	24030381
PD6922a	NF1	c.4880T>A	V1627D	Substitution	sAML	AML-MDS	3	24030381
PD6925a	TET2	c.3812G>A	C1271Y	Substitution	MDS	RCMD	3	24030381
PD6925a	SRSF2	c.284_307del24	P95_R102delPPDSHHSR	Deletion	MDS	RCMD	3	24030381
PD6925a	TET2	c.1837delG	L615fs*24	Deletion	MDS	RCMD	3	24030381
PD6926a	DNMT3A	c.2644C>T	R882C	Substitution	MDS	RCMD	3	24030381
PD6926a	STAG2	c.1896T>A	C632*	Substitution	MDS	RCMD	3	24030381
PD6926a	U2AF1	c.101C>T	S34F	Substitution	MDS	RCMD	3	24030381
PD6927a	SF3B1	c.1997A>G	K666R	Substitution	MDS	RARS	3	24030381
PD6928a	JAK2	c.1849G>T	V617F	Substitution	sAML	AML-MDS	3	24030381
PD6928a	KIT	c.2279A>T	D760V	Substitution	sAML	AML-MDS	3	24030381
PD6928a	RUNX1	c.486G>C	R162S	Substitution	sAML	AML-MDS	3	24030381
PD6929a	IDH2	c.419G>A	R140Q	Substitution	MDS	RCMD	3	24030381
PD6929a	SRSF2	c.284C>A	P95H	Substitution	MDS	RCMD	3	24030381
PD6931a	SF3B1	c.2098A>G	K700E	Substitution	MDS	RCMD-RS	3	24030381
PD6931a	TET2	c.5650A>G	T1884A	Substitution	MDS	RCMD-RS	3	24030381
PD6934a	GATA2	c.1150A>G	R384G	Substitution	MDS	RAEB	3	24030381
PD6934a	SF3B1	c.1986C>G	H662Q	Substitution	MDS	RAEB	3	24030381
PD6937a	ZRSR2	c.838T>C	C280R	Substitution	MDS	RAEB	3	24030381
PD6938a	SF3B1	c.2098A>G	K700E	Substitution	MDS	RARS	3	24030381
PD6939a	DNMT3A	c.2657A>G	Q886R	Substitution	MDS	RARS	3	24030381
PD6939a	DNMT3A	c.1603T>C	S535P	Substitution	MDS	RARS	3	24030381
PD6939a	FLT3	c.499A>G	T167A	Substitution	MDS	RARS	3	24030381
PD6939a	SF3B1	c.2098A>G	K700E	Substitution	MDS	RARS	3	24030381
PD6940a	IDH2	c.419G>A	R140Q	Substitution	MDS	RAEB	3	24030381
PD6940a	NF1	c.3827G>T	R1276L	Substitution	MDS	RAEB	3	24030381
PD6940a	SRSF2	c.284C>G	P95R	Substitution	MDS	RAEB	3	24030381
PD6941a	U2AF1	c.699T>A	D233E	Substitution	MDS	RCMD	3	24030381
PD6941a	TET2	c.2056A>T	R686*	Substitution	MDS	RCMD	3	24030381
PD6943a	GNAS	c.1801C>G	R601G	Substitution	MDS	RCMD-RS	3	24030381
PD6943a	SRSF2	c.284C>T	P95L	Substitution	MDS	RCMD-RS	3	24030381
PD6943a	ASXL1	c.1249C>T	R417*	Substitution	MDS	RCMD-RS	3	24030381
PD6944a	EZH2	c.1159A>T	R387W	Substitution	MDS	RCMD	3	24030381
PD6944a	KIT	c.2924A>T	D975V	Substitution	MDS	RCMD	3	24030381
PD6944a	TET2	c.1562G>A	S521N	Substitution	MDS	RCMD	3	24030381
PD6944a	TET2	c.25G>A	V9I	Substitution	MDS	RCMD	3	24030381
PD6944a	BRAF	c.1507G>T	G503*	Substitution	MDS	RCMD	3	24030381
PD6945a	SRSF2	c.284C>T	P95L	Substitution	CMML		3	24030381
PD6946a	NRAS	c.38G>T	G13V	Substitution	CMML		3	24030381
PD6946a	NRAS	c.34G>T	G12C	Substitution	CMML		3	24030381
PD6946a	EZH2	c.338G>A	W113*	Substitution	CMML		3	24030381
PD6946a	RUNX1	c.611G>A	R204Q	Substitution	CMML		3	24030381
PD6946a	STAG2	c.451G>T	E151*	Substitution	CMML		3	24030381
PD6947a	ZRSR2	c.145G>C	E49Q	Substitution	MDS	RAEB	3	24030381
PD6947a	TET2	c.2490_2491insAATA	Q831fs*16	Insertion	MDS	RAEB	3	24030381
PD6948a	EZH2	c.2084C>T	S695L	Substitution	MDS	RARS	3	24030381
PD6948a	SF3B1	c.2098A>G	K700E	Substitution	MDS	RARS	3	24030381
PD6948a	RUNX1	c.291_292insCTCTG	V101fs*23	Insertion	MDS	RARS	3	24030381
PD6949a	JAK2	c.1849G>T	V617F	Substitution	MDS	RAEB	3	24030381
PD6950a	EZH2	c.1798delG	D600fs*75	Deletion	sAML	AML-MDS	3	24030381
PD6950a	TET2	c.1235delT	P413fs*14	Deletion	sAML	AML-MDS	3	24030381
PD6950a	TET2	c.2896C>T	Q966*	Substitution	sAML	AML-MDS	3	24030381
PD6950a	U2AF1	c.470A>C	Q157P	Substitution	sAML	AML-MDS	3	24030381
PD6953a	RUNX1	c.418-2C>T		Substitution	CMML		3	24030381
PD6953a	U2AF1	c.470A>C	Q157P	Substitution	CMML		3	24030381
PD6955a	KRAS	c.99T>G	D33E	Substitution	MDS	RAEB	3	24030381
PD6955a	ASXL1	c.2387G>A	W796*	Substitution	MDS	RAEB	3	24030381
PD6957a	TET2	c.397delC	P133fs*12	Deletion	CMML		3	24030381
PD6957a	TET2	c.3788G>A	C1263Y	Substitution	CMML		3	24030381
PD6957a	SRSF2	c.284C>A	P95H	Substitution	CMML		3	24030381
PD6958a	IDH1	c.394C>T	R132C	Substitution	sAML	AML-MDS	3	24030381
PD6958a	JAK2	c.3164A>G	K1055R	Substitution	sAML	AML-MDS	3	24030381
PD6959a	SF3B1	c.1874G>T	R625L	Substitution	MDS	RCMD-RS	3	24030381
PD6960a	TET2	c.510delC	C171fs*12	Deletion	MDS	5q-	3	24030381
PD6960a	TET2	c.2953delC	P985fs*22	Deletion	MDS	5q-	3	24030381
PD6961a	SF3B1	c.2098A>G	K700E	Substitution	MDS	RARS	3	24030381
PD6962a	SRSF2	c.284_307del24	P95_R102delPPDSHHSR	Deletion	MDS	RCMD	3	24030381
PD6962a	STAG2	c.3097C>T	R1033*	Substitution	MDS	RCMD	3	24030381
PD6962a	STAG2	c.775C>T	R259*	Substitution	MDS	RCMD	3	24030381
PD6963a	RUNX1	c.422C>T	S141L	Substitution	MDS	RAEB	3	24030381
PD6963a	SRSF2	c.284_307del24	P95_R102delPPDSHHSR	Deletion	MDS	RAEB	3	24030381
PD6965a	FLT3	c.1774G>A	V592I	Substitution	sAML	AML-MDS	3	24030381
PD6968a	BCOR	c.3004_3005insCTTC	G1002fs*17	Insertion	sAML	AML-MDS	3	24030381
PD6968a	DNMT3A	c.2645G>A	R882H	Substitution	sAML	AML-MDS	3	24030381
PD6968a	IDH2	c.419G>A	R140Q	Substitution	sAML	AML-MDS	3	24030381
PD6969a	STAG2	c.2950G>T	E984*	Substitution	MDS	RAEB	3	24030381
PD6969a	U2AF1	c.101C>A	S34Y	Substitution	MDS	RAEB	3	24030381
PD6970a	TET2	c.2728C>T	Q910*	Substitution	CMML		3	24030381
PD6970a	TET2	c.4481C>G	S1494*	Substitution	CMML		3	24030381
PD6970a	SRSF2	c.284C>T	P95L	Substitution	CMML		3	24030381
PD6972a	JAK2	c.1849G>T	V617F	Substitution	MDS	RAEB	3	24030381
PD6972a	ASXL1	c.2209delG	V737fs*7	Deletion	MDS	RAEB	3	24030381
PD6974a	DNMT3A	c.2645G>A	R882H	Substitution	sAML	AML-MDS	3	24030381
PD6974a	IDH1	c.394C>T	R132C	Substitution	sAML	AML-MDS	3	24030381
PD6975a	GNAS	c.931A>C	I311L	Substitution	MDS	RAEB	3	24030381
PD6977a	ASXL1	c.4121_4122insG	P1377fs*3	Insertion	MDS	RAEB	3	24030381
PD6977a	IDH2	c.1354C>T	Q452*	Substitution	MDS	RAEB	3	24030381
PD6980a	EZH2	c.1978G>A	G660R	Substitution	MDS	RAEB	3	24030381
PD6981a	TP53	c.811G>A	E271K	Substitution	MDS	RA	3	24030381
PD6982a	FLT3	c.196G>A	A66T	Substitution	MDS	RCMD-RS	3	24030381
PD6985a	IDH1	c.394C>T	R132C	Substitution	MDS	RAEB	3	24030381
PD6985a	KIT	c.698G>A	C233Y	Substitution	MDS	RAEB	3	24030381
PD6985a	PHF6	c.643T>C	C215R	Substitution	MDS	RAEB	3	24030381
PD6985a	RUNX1	c.338C>T	P113L	Substitution	MDS	RAEB	3	24030381
PD6985a	SRSF2	c.284C>G	P95R	Substitution	MDS	RAEB	3	24030381
PD6985a	ASXL1	c.1772_1773insA	Y591fs*0	Insertion	MDS	RAEB	3	24030381
PD6986a	U2AF1	c.467G>A	R156H	Substitution	MDS	RAEB	3	24030381
PD6987a	SRSF2	c.284_307del24	P95_R102delPPDSHHSR	Deletion	MDS	RCMD-RS	3	24030381
PD6988a	JAK2	c.365G>A	R122H	Substitution	MDS	RAEB	3	24030381
PD6988a	U2AF1	c.470A>C	Q157P	Substitution	MDS	RAEB	3	24030381
PD6989a	SF3B1	c.2098A>G	K700E	Substitution	MDS	RARS	3	24030381
PD6991a	SF3B1	c.2098A>G	K700E	Substitution	MDS	RAEB	3	24030381
PD6991a	TET2	c.2809C>G	H937D	Substitution	MDS	RAEB	3	24030381
PD6991a	RUNX1	c.539_540insG	F180fs*33	Insertion	MDS	RAEB	3	24030381
PD6991a	STAG2	c.1149_1150delAT	Y384fs*0	Deletion	MDS	RAEB	3	24030381
PD6992a	PHF6	c.457C>T	P153S	Substitution	MDS	RCMD-RS	3	24030381
PD6993a	SF3B1	c.2098A>G	K700E	Substitution	MDS	RARS	3	24030381
PD6994a	SF3B1	c.1997A>G	K666R	Substitution	MDS	5q-	3	24030381
PD6997a	ETV6	c.283_285delCTG	L95delL	Deletion	MDS	RA	3	24030381
PD6998a	IDH2	c.419G>A	R140Q	Substitution	MDS	RAEB	3	24030381
PD6998a	SRSF2	c.284C>A	P95H	Substitution	MDS	RAEB	3	24030381
PD6998a	ASXL1	c.1934_1935insG	G646fs*12	Insertion	MDS	RAEB	3	24030381
PD6998a	STAG2	c.3034C>T	R1012*	Substitution	MDS	RAEB	3	24030381
PD6999a	SF3B1	c.2098A>G	K700E	Substitution	MDS	RAEB	3	24030381
PD6999a	BCOR	c.664delC	L222fs*44	Deletion	MDS	RAEB	3	24030381
PD7000a	SF3B1	c.2098A>G	K700E	Substitution	MDS	RARS	3	24030381
PD7000a	TET2	c.2950G>T	E984*	Substitution	MDS	RARS	3	24030381
PD7001a	DNMT3A	c.2158C>G	R720G	Substitution	MDS	RARS	3	24030381
PD7001a	DNMT3A	c.2159G>A	R720H	Substitution	MDS	RARS	3	24030381
PD7001a	RUNX1	c.320G>A	R107H	Substitution	MDS	RARS	3	24030381
PD7001a	SF3B1	c.1996A>C	K666Q	Substitution	MDS	RARS	3	24030381
PD7002a	SF3B1	c.2342A>G	D781G	Substitution	MDS	RARS	3	24030381
PD7002a	TET2	c.4072T>C	C1358R	Substitution	MDS	RARS	3	24030381
PD7006a	TET2	c.3863G>A	G1288D	Substitution	MDS	RAEB	3	24030381
PD7006a	ASXL1	c.3005delC	S1003fs*21	Deletion	MDS	RAEB	3	24030381
PD7006a	TET2	c.3154A>T	K1052*	Substitution	MDS	RAEB	3	24030381
PD7008a	GNAS	c.2531G>A	R844H	Substitution	MDS	RA	3	24030381
PD7008a	TET2	c.1267A>T	K423*	Substitution	MDS	RA	3	24030381
PD7008a	ZRSR2	c.1020G>A	W340*	Substitution	MDS	RA	3	24030381
PD7009a	FLT3	c.499A>G	T167A	Substitution	MDS	RCMD-RS	3	24030381
PD7009a	IDH1	c.395G>A	R132H	Substitution	MDS	RCMD-RS	3	24030381
PD7009a	SRSF2	c.284_307del24	P95_R102delPPDSHHSR	Deletion	MDS	RCMD-RS	3	24030381
PD7010a	ASXL1	c.3005delC	S1003fs*21	Deletion	sAML	AML-MDS	3	24030381
PD7010a	NF1	c.2293C>T	R765C	Substitution	sAML	AML-MDS	3	24030381
PD7010a	TET2		D932fs*21	Deletion	sAML	AML-MDS	3	24030381
PD7010a	TP53	c.322G>A	G108S	Substitution	sAML	AML-MDS	3	24030381
PD7011a	SF3B1	c.2098A>G	K700E	Substitution	MDS	RARS	3	24030381
PD7011a	TET2	c.4176C>G	S1392R	Substitution	MDS	RARS	3	24030381
PD7016a	ETV6	c.23G>A	C8Y	Substitution	MDS	RCMD	3	24030381
PD7016a	GNAS	c.586C>T	P196S	Substitution	MDS	RCMD	3	24030381
PD7016a	GNAS	c.1946G>A	R649H	Substitution	MDS	RCMD	3	24030381
PD7016a	PTPN11	c.1330C>T	H444Y	Substitution	MDS	RCMD	3	24030381
PD7016a	TP53	c.322G>A	G108S	Substitution	MDS	RCMD	3	24030381
PD7016a	ZRSR2	c.843A>T	Q281H	Substitution	MDS	RCMD	3	24030381
PD7016a	ETV6	c.34C>T	Q12*	Substitution	MDS	RCMD	3	24030381
PD7017a	DNMT3A	c.1015G>A	V339M	Substitution	MDS	RAEB	3	24030381
PD7017a	TP53	c.322G>A	G108S	Substitution	MDS	RAEB	3	24030381
PD7017a	TP53	c.353C>T	T118I	Substitution	MDS	RAEB	3	24030381
PD7018a	TET2	c.307C>G	L103V	Substitution	MDS	RCMD	3	24030381
PD7020a	BCOR	c.4799_4801delTCT	F1600delF	Deletion	MDS	RCMD-RS	3	24030381
PD7022a	SF3B1	c.2098A>G	K700E	Substitution	MDS	RARS	3	24030381
PD7024a	SF3B1	c.2098A>G	K700E	Substitution	MDS	RARS	3	24030381
PD7026a	FLT3	c.2726A>G	D909G	Substitution	MDS	RAEB	3	24030381
PD7026a	RUNX1	c.320G>A	R107H	Substitution	MDS	RAEB	3	24030381
PD7027a	SRSF2	c.284C>A	P95H	Substitution	sAML	AML-MDS	3	24030381
PD7027a	STAG2	c.2792_2793insA	Q932fs*6	Insertion	sAML	AML-MDS	3	24030381
PD7027a	TET2	c.5374C>T	H1792Y	Substitution	sAML	AML-MDS	3	24030381
PD7028a	IDH2	c.419G>A	R140Q	Substitution	MDS	RAEB	3	24030381
PD7028a	SRSF2	c.284C>A	P95H	Substitution	MDS	RAEB	3	24030381
PD7029a	SF3B1	c.2098A>G	K700E	Substitution	MDS	5q-	3	24030381
PD7031a	SRSF2	c.284C>A	P95H	Substitution	MDS	RCMD	3	24030381
PD7031a	TET2	c.2276_2277insT	P761fs*8	Insertion	MDS	RCMD	3	24030381
PD7031a	ASXL1	c.2320A>T	R774*	Substitution	MDS	RCMD	3	24030381
PD7032a	NPM1	c.863_864insTATG	W288fs*12	Insertion	sAML	AML-MDS	3	24030381
PD7032a	WT1	c.559C>T	Q187*	Substitution	sAML	AML-MDS	3	24030381
PD7033a	SRSF2	c.284C>A	P95H	Substitution	MDS	RAEB	3	24030381
PD7033a	STAG2	c.3053_3053+1insT	Y1019fs*35	Insertion	MDS	RAEB	3	24030381
PD7033a	ZRSR2	c.1343_1344insGAGCCGGAGCCG	R448_R449insSRSR	Insertion	MDS	RAEB	3	24030381
PD7034a	TET2	c.4130T>C	F1377S	Substitution	MDS	RA	3	24030381
PD7034a	TET2	c.4165C>T	Q1389*	Substitution	MDS	RA	3	24030381
PD7036a	SRSF2	c.284C>A	P95H	Substitution	MDS	RAEB	3	24030381
PD7036a	STAG2	c.2325C>A	Y775*	Substitution	MDS	RAEB	3	24030381
PD7037a	EZH2	c.374A>T	E125V	Substitution	MDS	RCMD	3	24030381
PD7037a	EZH2	c.2084C>T	S695L	Substitution	MDS	RCMD	3	24030381
PD7037a	RUNX1	c.735_736insC	T246fs*15	Insertion	MDS	RCMD	3	24030381
PD7038a	TP53	c.824G>A	C275Y	Substitution	MDS	5q-	3	24030381
PD7040a	BCOR	c.1886A>G	N629S	Substitution	sAML	AML-MDS	3	24030381
PD7040a	NPM1	c.379G>A	D127N	Substitution	sAML	AML-MDS	3	24030381
PD7040a	TP53	c.314G>T	G105V	Substitution	sAML	AML-MDS	3	24030381
PD7044a	JAK2	c.2767C>T	R923C	Substitution	MDS	RAEB	3	24030381
PD7045a	DNMT3A	c.2284G>T	G762C	Substitution	MDS	RAEB	3	24030381
PD7071a	SF3B1	c.1866G>C	E622D	Substitution	MDS	RARS	3	24030381
PD7072a	SF3B1	c.2098A>G	K700E	Substitution	MDS	RCMD-RS	3	24030381
PD7072a	TET2	c.373delT	F125fs*3	Deletion	MDS	RCMD-RS	3	24030381
PD7073a	SF3B1	c.2098A>G	K700E	Substitution	MDS	RCMD-RS	3	24030381
PD7073a	DNMT3A	c.719_732delAGGAGGCCAGCCCT	E240fs*8	Deletion	MDS	RCMD-RS	3	24030381
PD7073a	TET2	c.2746C>T	Q916*	Substitution	MDS	RCMD-RS	3	24030381
PD7074a	SF3B1	c.2098A>G	K700E	Substitution	MDS	RCMD-RS	3	24030381
PD7076a	SF3B1	c.2098A>G	K700E	Substitution	MDS	RARS	3	24030381
PD7077a	SF3B1	c.2098A>G	K700E	Substitution	MDS	RCMD-RS	3	24030381
PD7078a	SF3B1	c.1986C>A	H662Q	Substitution	MDS	RARS	3	24030381
PD7078a	U2AF2	c.559T>G	L187V	Substitution	MDS	RARS	3	24030381
PD7078a	TET2	c.2368C>T	Q790*	Substitution	MDS	RARS	3	24030381
PD7079a	DNMT3A	c.2645G>A	R882H	Substitution	MDS	RCMD-RS	3	24030381
PD7079a	SF3B1	c.1986C>A	H662Q	Substitution	MDS	RCMD-RS	3	24030381
PD7079a	TET2	c.1677T>A	Y559*	Substitution	MDS	RCMD-RS	3	24030381
PD7080a	SF3B1	c.1997A>C	K666T	Substitution	MDS	RARS	3	24030381
PD7081a	IDH1	c.1021G>T	A341S	Substitution	MDS	RCMD-RS	3	24030381
PD7081a	SF3B1	c.1986C>A	H662Q	Substitution	MDS	RCMD-RS	3	24030381
PD7081a	TET2	c.5641C>T	H1881Y	Substitution	MDS	RCMD-RS	3	24030381
PD7082a	SF3B1	c.1997A>T	K666M	Substitution	MDS	RARS	3	24030381
PD7082a	TET2	c.2479G>A	A827T	Substitution	MDS	RARS	3	24030381
PD7083a	SF3B1	c.1986C>G	H662Q	Substitution	MDS	RCMD-RS	3	24030381
PD7083a	TET2	c.1954C>T	Q652*	Substitution	MDS	RCMD-RS	3	24030381
PD7083a	TET2	c.4983T>A	Y1661*	Substitution	MDS	RCMD-RS	3	24030381
PD7084a	DNMT3A	c.2603T>C	F868S	Substitution	MDS	RARS	3	24030381
PD7084a	SF3B1	c.2098A>G	K700E	Substitution	MDS	RARS	3	24030381
PD7085a	JAK2	c.1849G>T	V617F	Substitution	MDS	RCMD-RS	3	24030381
PD7085a	SF3B1	c.2098A>G	K700E	Substitution	MDS	RCMD-RS	3	24030381
PD7085a	TET2	c.3965T>A	L1322Q	Substitution	MDS	RCMD-RS	3	24030381
PD7086a	SF3B1	c.1866G>C	E622D	Substitution	MDS	RARS	3	24030381
PD7086a	TET2	c.3954G>C	E1318D	Substitution	MDS	RARS	3	24030381
PD7086a	TET2	c.3755delT	L1252fs*14	Deletion	MDS	RARS	3	24030381
PD7087a	DNMT3A	c.1242C>G	F414L	Substitution	MDS	RARS	3	24030381
PD7087a	SF3B1	c.1984C>G	H662D	Substitution	MDS	RARS	3	24030381
PD7087a	DNMT3A	c.915G>A	W305*	Substitution	MDS	RARS	3	24030381
PD7088a	DNMT3A	c.2644C>T	R882C	Substitution	MDS	RCMD-RS	3	24030381
PD7088a	SF3B1	c.2098A>G	K700E	Substitution	MDS	RCMD-RS	3	24030381
PD7090a	DNMT3A	c.2644C>T	R882C	Substitution	MDS	RCMD	3	24030381
PD7090a	SF3B1	c.2098A>G	K700E	Substitution	MDS	RCMD	3	24030381
PD7090a	TET2	c.3937delG	D1314fs*49	Deletion	MDS	RCMD	3	24030381
PD7090a	TET2	c.3169G>T	E1057*	Substitution	MDS	RCMD	3	24030381
PD7093a	SF3B1	c.1986C>A	H662Q	Substitution	MDS	RCMD-RS	3	24030381
PD7095a	SF3B1	c.1866G>T	E622D	Substitution	MDS	RARS	3	24030381
PD7097a	SF3B1	c.2098A>G	K700E	Substitution	MDS	RCMD-RS	3	24030381
PD7098a	CBL	c.2101A>G	M701V	Substitution	MDS	RCMD-RS	3	24030381
PD7098a	SF3B1	c.2098A>G	K700E	Substitution	MDS	RCMD-RS	3	24030381
PD7099a	SF3B1	c.1866G>T	E622D	Substitution	MDS	RCMD-RS	3	24030381
PD7099a	TET2	c.1646delC	T549fs*12	Deletion	MDS	RCMD-RS	3	24030381
PD7100a	SF3B1	c.1874G>T	R625L	Substitution	MDS	RARS	3	24030381
PD7102a	SF3B1	c.1997A>G	K666R	Substitution	MDS	RARS	3	24030381
PD7103a	TP53	c.581T>G	L194R	Substitution	MDS	RCMD-RS	3	24030381
PD7103a	TP53	c.659A>G	Y220C	Substitution	MDS	RCMD-RS	3	24030381
PD7104a	SF3B1	c.2098A>G	K700E	Substitution	MDS	RARS	3	24030381
PD7105a	EZH2	c.1981A>G	K661E	Substitution	MDS	RARS	3	24030381
PD7105a	SF3B1	c.2098A>G	K700E	Substitution	MDS	RARS	3	24030381
PD7106a	SF3B1	c.1997A>G	K666R	Substitution	MDS	RCMD-RS	3	24030381
PD7106a	TET2	c.2068C>T	Q690*	Substitution	MDS	RCMD-RS	3	24030381
PD7106a	TET2	c.4210C>T	R1404*	Substitution	MDS	RCMD-RS	3	24030381
PD7108a	SF3B1	c.2098A>G	K700E	Substitution	MDS	RARS	3	24030381
PD7109a	SF3B1	c.1876A>G	N626D	Substitution	MDS	RCMD-RS	3	24030381
PD7110a	BCOR	c.188G>A	R63K	Substitution	MDS	RARS	3	24030381
PD7110a	SF3B1	c.1866G>T	E622D	Substitution	MDS	RARS	3	24030381
PD7111a	DNMT3A	c.2644C>T	R882C	Substitution	MDS	RCMD	3	24030381
PD7111a	SF3B1	c.2098A>G	K700E	Substitution	MDS	RCMD	3	24030381
PD7112a	SF3B1	c.1866G>T	E622D	Substitution	MDS	RARS	3	24030381
PD7112a	DNMT3A	c.1344C>A	Y448*	Substitution	MDS	RARS	3	24030381
PD7112a	TET2	c.1261G>T	E421*	Substitution	MDS	RARS	3	24030381
PD7113a	ETV6	c.283_285delCTG	L95delL	Deletion	MDS	RA	3	24030381
PD7114a	ASXL1	c.1488C>G	N496K	Substitution	MDS	RA	3	24030381
PD7116a	RUNX1	c.422C>T	S141L	Substitution	MDS	RCMD	3	24030381
PD7116a	SRSF2	c.284C>T	P95L	Substitution	MDS	RCMD	3	24030381
PD7116a	TP53	c.833C>G	P278R	Substitution	MDS	RCMD	3	24030381
PD7116a	TET2	c.1147C>T	Q383*	Substitution	MDS	RCMD	3	24030381
PD7116a	TET2	c.2272C>T	Q758*	Substitution	MDS	RCMD	3	24030381
PD7117a	BCOR	c.4818delT	C1606fs*12	Deletion	MDS	RCMD	3	24030381
PD7117a	U2AF1	c.101C>T	S34F	Substitution	MDS	RCMD	3	24030381
PD7118a	SRSF2	c.284C>A	P95H	Substitution	MDS	RCMD	3	24030381
PD7118a	TET2	c.4072T>G	C1358G	Substitution	MDS	RCMD	3	24030381
PD7118a	TET2	c.5680C>A	P1894T	Substitution	MDS	RCMD	3	24030381
PD7119a	DNMT3A	c.2193_2195delCTT	F732delF	Deletion	MDS	RCMD	3	24030381
PD7120a	TP53	c.542G>A	R181H	Substitution	MDS	RAEB	3	24030381
PD7364a	FLT3	c.1310G>A	R437K	Substitution	MDS	RAEB	3	24030381
PD7364a	SRSF2	c.284C>G	P95R	Substitution	MDS	RAEB	3	24030381
PD7364a	ZRSR2	c.756_757insA	V253fs*36	Insertion	MDS	RAEB	3	24030381
PD7364a	TET2	c.1648C>T	R550*	Substitution	MDS	RAEB	3	24030381
PD7364a	TET2	c.4240C>T	Q1414*	Substitution	MDS	RAEB	3	24030381
PD7366a	TET2	c.4045-2A>G		Substitution	MDS	RCMD	3	24030381
PD7366a	TET2	c.944delC	Q317fs*30	Deletion	MDS	RCMD	3	24030381
PD7367a	TET2	c.2207C>G	S736*	Substitution	CMML		3	24030381
PD7367a	TET2	c.2689delC	Q897fs*24	Deletion	CMML		3	24030381
PD7367a	TET2	c.4075C>T	R1359C	Substitution	CMML		3	24030381
PD7367a	SRSF2	c.284C>T	P95L	Substitution	CMML		3	24030381
PD7369a	CBL	c.2183G>A	S728N	Substitution	MDS	RAEB	3	24030381
PD7370a	FLT3	c.1339G>A	A447T	Substitution	CMML		3	24030381
PD7370a	ASXL1	c.1888_1910del23	E635fs*15	Deletion	CMML		3	24030381
PD7370a	ASXL1		Coding fs	Complex InsertionDeletion	CMML		3	24030381
PD7371a	TET2	c.693delT	Q232fs*18	Deletion	CMML		3	24030381
PD7371a	TET2	c.3692T>C	L1231P	Substitution	CMML		3	24030381
PD7372a	IDH2	c.419G>A	R140Q	Substitution	MDS	RAEB	3	24030381
PD7372a	STAG2	c.658_659insAGCA	T220fs*20	Insertion	MDS	RAEB	3	24030381
PD7372a	U2AF1	c.467G>A	R156H	Substitution	MDS	RAEB	3	24030381
PD7374a	PTPN11	c.206A>T	E69V	Substitution	MDS	5q-	3	24030381
PD7375a	CBL	c.1250C>A	P417H	Substitution	MDS	RAEB	3	24030381
PD7375a	ASXL1	c.2894_2896delGAG	G967delG	Deletion	MDS	RAEB	3	24030381
PD7375a	TET2	c.4497_4500delAAAA	Q1501fs*69	Deletion	MDS	RAEB	3	24030381
PD7375a	CBL	c.1837G>T	E613*	Substitution	MDS	RAEB	3	24030381
PD7376a	PHF6	c.941T>C	I314T	Substitution	MDS	RCMD	3	24030381
PD7376a	TET2	c.3581C>T	P1194L	Substitution	MDS	RCMD	3	24030381
PD7376a	PHF6	c.308_309insA	Y103fs*1	Insertion	MDS	RCMD	3	24030381
PD7376a	TET2	c.4549_4550insT	S1518fs*60	Insertion	MDS	RCMD	3	24030381
PD7376a	PHF6	c.673C>T	R225*	Substitution	MDS	RCMD	3	24030381
PD7377a	TET2	c.3160_3161insT	V1056fs*2	Insertion	CMML		3	24030381
PD7377a	TET2	c.3594+1G>T		Substitution	CMML		3	24030381
PD7377a	IDH2	c.428_429insG	T146fs*126	Insertion	CMML		3	24030381
PD7377a	ZRSR2	c.397G>T	E133*	Substitution	CMML		3	24030381
PD7377a	BCOR	c.4630G>A	E1544K	Substitution	CMML		3	24030381
PD7378a	SF3B1	c.2219G>A	G740E	Substitution	MDS	RCMD-RS	3	24030381
PD7379a	DNMT3A	c.2095G>C	G699R	Substitution	MDS	RAEB	3	24030381
PD7379a	DNMT3A	c.2483G>A	S828N	Substitution	MDS	RAEB	3	24030381
PD7379a	IDH2	c.676G>A	E226K	Substitution	MDS	RAEB	3	24030381
PD7379a	NF1	c.7304G>A	S2435N	Substitution	MDS	RAEB	3	24030381
PD7379a	NF1	c.5768C>T	T1923M	Substitution	MDS	RAEB	3	24030381
PD7379a	TP53	c.989T>C	L330P	Substitution	MDS	RAEB	3	24030381
PD7380a	TP53	c.357delC	K120fs*3	Deletion	MDS	RCMD-RS	3	24030381
PD7381a	DNMT3A	c.2195T>C	F732S	Substitution	MDS	RCMD-RS	3	24030381
PD7381a	SF3B1	c.2098A>G	K700E	Substitution	MDS	RCMD-RS	3	24030381
PD7381a	TET2	c.2737C>T	Q913*	Substitution	MDS	RCMD-RS	3	24030381
PD7382a	NRAS	c.37G>T	G13C	Substitution	MDS	RAEB	3	24030381
PD7382a	FLT3	c.743-8T>C		Substitution	MDS	RAEB	3	24030381
PD7383a	TET2	c.4311_4312insA	R1440fs*38	Insertion	MDS	5q-	3	24030381
PD7383a	DNMT3A	c.2258G>A	W753*	Substitution	MDS	5q-	3	24030381
PD7384a	BCOR	c.3568G>A	E1190K	Substitution	MDS	RAEB	3	24030381
PD7384a	DNMT3A	c.2645G>A	R882H	Substitution	MDS	RAEB	3	24030381
PD7384a	NF1	c.7618A>G	T2540A	Substitution	MDS	RAEB	3	24030381
PD7384a	RUNX1	c.335T>A	L112Q	Substitution	MDS	RAEB	3	24030381
PD7384a	EZH2	c.1673-4G>C		Substitution	MDS	RAEB	3	24030381
PD7384a	BCOR	c.670C>T	Q224*	Substitution	MDS	RAEB	3	24030381
PD7384a	STAG2	c.3395T>G	L1132*	Substitution	MDS	RAEB	3	24030381
PD7385a	ASXL1	c.2077C>T	R693*	Substitution	MDS	RAEB	3	24030381
PD7385a	U2AF1	c.470A>G	Q157R	Substitution	MDS	RAEB	3	24030381
PD7385a	U2AF1	c.101C>T	S34F	Substitution	MDS	RAEB	3	24030381
PD7386a	ASXL1	c.3121G>A	A1041T	Substitution	MDS	RAEB	3	24030381
PD7386a	ASXL1	c.2755A>G	I919V	Substitution	MDS	RAEB	3	24030381
PD7386a	ASXL1	c.3139A>T	N1047Y	Substitution	MDS	RAEB	3	24030381
PD7386a	IDH2	c.515G>A	R172K	Substitution	MDS	RAEB	3	24030381
PD7386a	JAK2	c.1849G>T	V617F	Substitution	MDS	RAEB	3	24030381
PD7386a	KIT	c.2866C>T	R956W	Substitution	MDS	RAEB	3	24030381
PD7386a	NF1	c.1279C>T	P427S	Substitution	MDS	RAEB	3	24030381
PD7386a	SF3B1	c.1091C>T	A364V	Substitution	MDS	RAEB	3	24030381
PD7386a	NF1	c.4084C>T	R1362*	Substitution	MDS	RAEB	3	24030381
PD7387a	TET2	c.3782G>A	R1261H	Substitution	CMML		3	24030381
PD7387a	TET2	c.3821_3822delAG	Q1274fs*25	Deletion	CMML		3	24030381
PD7387a	TET2	c.3821A>G	Q1274R	Substitution	CMML		3	24030381
PD7387a	CBL	c.1142G>A	C381Y	Substitution	CMML		3	24030381
PD7387a	CBL	c.1148T>C	I383T	Substitution	CMML		3	24030381
PD7387a	SRSF2	c.284C>A	P95H	Substitution	CMML		3	24030381
PD7387a	RUNX1	c.1007_1008insC	A338fs*262	Insertion	CMML		3	24030381
PD7388a	IDH1	c.395G>A	R132H	Substitution	MDS	RAEB	3	24030381
PD7388a	STAG2	c.2746G>A	A916T	Substitution	MDS	RAEB	3	24030381
PD7388a	WT1	c.1103_1104insG	R369fs*16	Insertion	MDS	RAEB	3	24030381
PD7388a	WT1	c.1109_1110insT	V371fs*14	Insertion	MDS	RAEB	3	24030381
PD7389a	EZH2	c.1770T>G	C590W	Substitution	MDS	RAEB	3	24030381
PD7389a	RUNX1	c.1111_1112insT	M371fs*229	Insertion	MDS	RAEB	3	24030381
PD7389a	ASXL1	c.1762C>T	Q588*	Substitution	MDS	RAEB	3	24030381
PD7389a	TET2	c.5038C>T	Q1680*	Substitution	MDS	RAEB	3	24030381
PD7390a	SF3B1	c.2098A>G	K700E	Substitution	MDS	RAEB	3	24030381
PD7390a	TET2	c.3788delG	C1263fs*3	Deletion	MDS	RAEB	3	24030381
PD7390a	TET2	c.1814_1815insA	Y605fs*1	Insertion	MDS	RAEB	3	24030381
PD7391a	NRAS	c.34G>A	G12S	Substitution	MDS	RAEB	3	24030381
PD7391a	RUNX1	c.507A>C	R169S	Substitution	MDS	RAEB	3	24030381
PD7391a	SRSF2	c.284C>A	P95H	Substitution	MDS	RAEB	3	24030381
PD7391a	TET2	c.3893G>A	C1298Y	Substitution	MDS	RAEB	3	24030381
PD7391a	ASXL1	c.2128delG	G710fs*15	Deletion	MDS	RAEB	3	24030381
PD7391a	STAG2	c.2429T>G	L810*	Substitution	MDS	RAEB	3	24030381
PD8645a	SF3B1	c.2098A>G	K700E	Substitution	MDS	RCMD-RS	3	24030381
PD8645a	DNMT3A	c.853G>T	E285*	Substitution	MDS	RCMD-RS	3	24030381
PD8646a	CBL	c.1690C>T	P564S	Substitution	MDS	RARS	3	24030381
PD8647a	IDH1	c.395G>A	R132H	Substitution	MDS	RCMD-RS	3	24030381
PD8647a	SF3B1	c.2098A>G	K700E	Substitution	MDS	RCMD-RS	3	24030381
PD8647a	SF3B1	c.3757-8T>C		Substitution	MDS	RCMD-RS	3	24030381
PD8647a	DNMT3A	c.1011_1013delAGT	V339delV	Deletion	MDS	RCMD-RS	3	24030381
PD8648a	SF3B1	c.1866G>C	E622D	Substitution	MDS	RARS	3	24030381
PD8728a	KIT	c.1976C>T	A659V	Substitution	MDS	RCMD	3	24030381
PD8728a	NF1	c.5410G>A	A1804T	Substitution	MDS	RCMD	3	24030381
PD8728a	SF3B1	c.2122G>A	A708T	Substitution	MDS	RCMD	3	24030381
PD8728a	ZRSR2	c.253G>A	E85K	Substitution	MDS	RCMD	3	24030381
PD8729a	IDH2	c.419G>A	R140Q	Substitution	MDS	RAEB	3	24030381
PD8729a	RUNX1	c.422C>T	S141L	Substitution	MDS	RAEB	3	24030381
PD8730a	KIT	c.2421G>T	K807N	Substitution	MDS	RAEB	3	24030381
PD8730a	NRAS	c.37G>T	G13C	Substitution	MDS	RAEB	3	24030381
PD8730a	SRSF2	c.284C>T	P95L	Substitution	MDS	RAEB	3	24030381
PD8730a	ZRSR2	c.142G>A	E48K	Substitution	MDS	RAEB	3	24030381
PD8730a	RUNX1	c.1031_1032insC	R346fs*254	Insertion	MDS	RAEB	3	24030381
PD8730a	ASXL1	c.2077C>T	R693*	Substitution	MDS	RAEB	3	24030381
PD8730a	TET2	c.973C>T	Q325*	Substitution	MDS	RAEB	3	24030381
PD8731a	EZH2	c.1967C>T	A656V	Substitution	MDS	RAEB	3	24030381
PD8731a	EZH2	c.745G>A	E249K	Substitution	MDS	RAEB	3	24030381
PD8731a	KIT	c.2447A>T	D816V	Substitution	MDS	RAEB	3	24030381
PD8731a	KIT	c.1427G>A	S476N	Substitution	MDS	RAEB	3	24030381
PD8731a	NRAS	c.35G>T	G12V	Substitution	MDS	RAEB	3	24030381
PD8731a	TET2	c.5618T>C	I1873T	Substitution	MDS	RAEB	3	24030381
PD8731a	WT1	c.1055C>T	A352V	Substitution	MDS	RAEB	3	24030381
PD8731a	ZRSR2	c.542G>T	C181F	Substitution	MDS	RAEB	3	24030381
PD8731a	ASXL1	c.2153delG	R718fs*7	Deletion	MDS	RAEB	3	24030381
PD8731a	RUNX1	c.1005_1006insT	A338fs*262	Insertion	MDS	RAEB	3	24030381
PD8731a	TET2	c.5554C>T	Q1852*	Substitution	MDS	RAEB	3	24030381
PD8732a	DNMT3A	c.2645G>A	R882H	Substitution	MDS	RCMD-RS	3	24030381
PD8732a	SF3B1	c.2098A>G	K700E	Substitution	MDS	RCMD-RS	3	24030381
PD8732a	TET2	c.4126G>A	D1376N	Substitution	MDS	RCMD-RS	3	24030381
PD8732a	KIT	c.1879+1G>A		Substitution	MDS	RCMD-RS	3	24030381
PD8733a	SF3B1	c.2098A>G	K700E	Substitution	MDS	RCMD-RS	3	24030381
PD8734a	NRAS	c.35G>A	G12D	Substitution	MDS	RCMD	3	24030381
PD8734a	PHF6	c.3G>C	M1I	Substitution	MDS	RCMD	3	24030381
PD8734a	NPM1	c.863_864insCATG	W288fs*12	Insertion	MDS	RCMD	3	24030381
PD8734a	WT1	c.1137_1138insCGGTC	A382fs*69	Insertion	MDS	RCMD	3	24030381
PD8735a	IDH1	c.791G>A	G264D	Substitution	CMML		3	24030381
PD8735a	TET2	c.1842_1843insG	L615fs*23	Insertion	CMML		3	24030381
PD8735a	TET2	c.3858delT	F1287fs*76	Deletion	CMML		3	24030381
PD8735a	TET2	c.3979C>T	Q1327*	Substitution	CMML		3	24030381
PD8735a	CBL	c.2032G>A	A678T	Substitution	CMML		3	24030381
PD8737a	TET2	c.3315_3316delAG	E1106fs*23	Deletion	CMML		3	24030381
PD8737a	KRAS	c.35G>A	G12D	Substitution	CMML		3	24030381
PD8738a	BCOR	c.4931C>T	T1644I	Substitution	CMML		3	24030381
PD8739a	FLT3	c.286G>A	D96N	Substitution	MDS	RAEB	3	24030381
PD8934a	STAG2	c.3481T>A	W1161R	Substitution	MDS	RAEB	3	24030381
PD8934a	TET2	c.5587G>A	A1863T	Substitution	MDS	RAEB	3	24030381
PD8934a	TP53	c.137C>T	S46F	Substitution	MDS	RAEB	3	24030381
PD8935a	EZH2	c.2007C>G	S669R	Substitution	MDS	RAEB	3	24030381
PD8935a	EZH2	c.1876G>A	V626M	Substitution	MDS	RAEB	3	24030381
PD8935a	NF1	c.4804G>A	G1602R	Substitution	MDS	RAEB	3	24030381
PD8935a	SF3B1	c.2098A>G	K700E	Substitution	MDS	RAEB	3	24030381
PD8935a	ZRSR2	c.716T>A	F239Y	Substitution	MDS	RAEB	3	24030381
PD8936a	CBL	c.1421C>T	A474V	Substitution	MDS	RARS	3	24030381
PD8936a	CBL	c.1319G>A	G440D	Substitution	MDS	RARS	3	24030381
PD8936a	JAK2	c.1849G>T	V617F	Substitution	MDS	RARS	3	24030381
PD8936a	SF3B1	c.1986C>A	H662Q	Substitution	MDS	RARS	3	24030381
PD8936a	TET2	c.3344C>A	P1115H	Substitution	MDS	RARS	3	24030381
PD8936a	ASXL1	c.2530_2531insC	S846fs*5	Insertion	MDS	RARS	3	24030381
PD8937a	NRAS	c.179G>A	G60E	Substitution	MDS	RCMD	3	24030381
PD8937a	ASXL1	c.1537G>T	E513*	Substitution	MDS	RCMD	3	24030381
PD8937a	TET2	c.2803G>T	G935*	Substitution	MDS	RCMD	3	24030381
PD8939a	ASXL1	c.3616_3625delGCAGTCCCAA	A1206fs*8	Deletion	MDS	RAEB	3	24030381
PD8939a	GATA2	c.1168_1170delAAG	K390delK	Deletion	MDS	RAEB	3	24030381
PD8939a	SRSF2	c.284_307del24	P95_R102delPPDSHHSR	Deletion	MDS	RAEB	3	24030381
PD9659a	SF3B1	c.2098A>G	K700E	Substitution	MDS	RARS	3	24030381
PD9659a	TET2	c.2896C>T	Q966*	Substitution	MDS	RARS	3	24030381
PD9659a	TET2	c.4889C>A	S1630*	Substitution	MDS	RARS	3	24030381
PD9660a	SF3B1	c.1997A>G	K666R	Substitution	MDS	RCMD-RS	3	24030381
PD9662a	IDH1	c.395G>A	R132H	Substitution	MDS	RCMD-RS	3	24030381
PD9662a	TET2	c.1648C>T	R550*	Substitution	MDS	RCMD-RS	3	24030381
PD9663a	BCOR	c.4405C>T	R1469W	Substitution	MDS	RCMD-RS	3	24030381
PD9663a	JAK2	c.1849G>T	V617F	Substitution	MDS	RCMD-RS	3	24030381
PD9663a	SF3B1	c.2098A>G	K700E	Substitution	MDS	RCMD-RS	3	24030381
PD9663a	RUNX1	c.879delT	P294fs*17	Deletion	MDS	RCMD-RS	3	24030381
PD9711a	SF3B1	c.2098A>G	K700E	Substitution	MDS	RARS	3	24030381
PD9711a	TET2	c.3743T>A	L1248H	Substitution	MDS	RARS	3	24030381
PD9711a	TET2	c.3954+1G>A		Substitution	MDS	RARS	3	24030381
E-H-100000-T1-1-D1-1	CBL	c.1256G>A	C419Y	missense	MDS	MDS-del5q	4	38319256
E-H-100000-T1-1-D1-1	TET2	c.3785G>T	R1262L	missense	MDS	MDS-del5q	4	38319256
E-H-100000-T1-1-D1-1	DNMT3A	c.1513_1528del16	E505fs*141	frameshift_variant	MDS	MDS-del5q	4	38319256
E-H-100002-T1-1-D1-1	TP53	c.154C>T	Q52*	stop_gained	MDS	MDS-EB2	4	38319256
E-H-100006-T1-1-D1-1	JAK2	c.1849G>T	V617F	missense	MDS	MDS-MLD	4	38319256
E-H-100006-T1-1-D1-1	TET2	c.1009_1010insA	N338fs*2	frameshift_variant	MDS	MDS-MLD	4	38319256
E-H-100006-T1-1-D1-1	SRSF2	c.284C>T	P95L	missense	MDS	MDS-MLD	4	38319256
E-H-100007-T1-1-D1-1	TET2	c.1648C>T	R550*	stop_gained	MDS	MDS-del5q	4	38319256
E-H-100007-T1-1-D1-1	TET2	c.3662G>C	C1221S	missense	MDS	MDS-del5q	4	38319256
E-H-100007-T1-1-D1-1	DNMT3A	c.1648G>A	G550R	missense	MDS	MDS-del5q	4	38319256
E-H-100009-T1-1-D1-1	DNMT3A	c.1502A>G	N501S	missense	MDS	MDS-EB1	4	38319256
E-H-100010-T1-1-D1-1	TP53	c.818G>A	R273H	missense	MDS	MDS-EB2	4	38319256
E-H-100012-T1-1-D1-1	GATA2	c.1187G>A	R396Q	missense	MDS	MDS-MLD	4	38319256
E-H-100014-T1-1-D1-1	STAG2	c.2032G>T	E678*	stop_gained	MDS	MDS-EB2	4	38319256
E-H-100014-T1-1-D1-1	IDH2	c.419G>A	R140Q	missense	MDS	MDS-EB2	4	38319256
E-H-100014-T1-1-D1-1	DNMT3A	c.2645G>A	R882H	missense	MDS	MDS-EB2	4	38319256
E-H-100015-T1-1-D1-1	TP53	c.376-2A>T		splice_site_variant	MDS	MDS-U	4	38319256
E-H-100015-T1-1-D1-1	EZH2	c.2195+1delg		splice_site_variant	MDS	MDS-U	4	38319256
E-H-100017-T1-1-D1-1	CEBPA	c.899G>T	R300L	missense	MDS	MDS-EB2	4	38319256
E-H-100017-T1-1-D1-1	U2AF1	c.101C>T	S34F	missense	MDS	MDS-EB2	4	38319256
E-H-100017-T1-1-D1-1	ASXL1	c.1726delC	L576fs*127	frameshift_variant	MDS	MDS-EB2	4	38319256
E-H-100018-T1-1-D1-1	TP53	c.614A>C	Y205S	missense	MDS	MDS-EB2	4	38319256
E-H-100018-T1-1-D1-1	TP53	c.476C>T	A159V	missense	MDS	MDS-EB2	4	38319256
E-H-100019-T1-1-D1-1	STAG2	c.2857C>T	R953*	stop_gained	MDS	MDS-EB2	4	38319256
E-H-100019-T1-1-D1-1	ASXL1	c.1926_1927insG	G646fs*12	frameshift_variant	MDS	MDS-EB2	4	38319256
E-H-100019-T1-1-D1-1	BCOR	c.4473_4474insAT	H1492fs*77	frameshift_variant	MDS	MDS-EB2	4	38319256
E-H-100019-T1-1-D1-1	IDH2	c.419G>A	R140Q	missense	MDS	MDS-EB2	4	38319256
E-H-100019-T1-1-D1-1	SRSF2	c.284C>A	P95H	missense	MDS	MDS-EB2	4	38319256
E-H-100020-T1-1-D1-1	RUNX1	c.422C>G	S141W	missense	MDS	MDS-EB1	4	38319256
E-H-100020-T1-1-D1-1	STAG2	c.646C>T	R216*	stop_gained	MDS	MDS-EB1	4	38319256
E-H-100020-T1-1-D1-1	TET2	c.4519C>T	Q1507*	stop_gained	MDS	MDS-EB1	4	38319256
E-H-100020-T1-1-D1-1	TET2	c.5500C>T	Q1834*	stop_gained	MDS	MDS-EB1	4	38319256
E-H-100020-T1-1-D1-1	ASXL1	c.1926_1927insG	G646fs*12	frameshift_variant	MDS	MDS-EB1	4	38319256
E-H-100020-T1-1-D1-1	CEBPA	c.1071_1074delCGCG	A358fs*63	frameshift_variant	MDS	MDS-EB1	4	38319256
E-H-100020-T1-1-D1-1	CEBPA	c.117delC	A40fs*120	frameshift_variant	MDS	MDS-EB1	4	38319256
E-H-100020-T1-1-D1-1	SRSF2	c.284C>A	P95H	missense	MDS	MDS-EB1	4	38319256
E-H-100023-T1-1-D1-1	BCOR	c.4484A>G	N1495S	missense	MDS	MDS-EB1	4	38319256
E-H-100023-T1-1-D1-1	RUNX1	c.601C>T	R201*	stop_gained	MDS	MDS-EB1	4	38319256
E-H-100023-T1-1-D1-1	ASXL1	c.1926_1927insG	G646fs*12	frameshift_variant	MDS	MDS-EB1	4	38319256
E-H-100023-T1-1-D1-1	STAG2	c.1538delT	L513fs*9	frameshift_variant	MDS	MDS-EB1	4	38319256
E-H-100023-T1-1-D1-1	TET2	c.822delC	N275fs*18	frameshift_variant	MDS	MDS-EB1	4	38319256
E-H-100023-T1-1-D1-1	SRSF2	c.284C>A	P95H	missense	MDS	MDS-EB1	4	38319256
E-H-100027-T1-1-D1-1	BCOR	c.3782_3783insAAAG	A1262fs*16	frameshift_variant	MDS	MDS-EB2	4	38319256
E-H-100027-T1-1-D1-1	STAG2	c.3325_3326insCACTG	T1112fs*6	frameshift_variant	MDS	MDS-EB2	4	38319256
E-H-100027-T1-1-D1-1	IDH2	c.419G>A	R140Q	missense	MDS	MDS-EB2	4	38319256
E-H-100027-T1-1-D1-1	DNMT3A	c.2645G>A	R882H	missense	MDS	MDS-EB2	4	38319256
E-H-100029-T1-1-D1-1	TET2	c.2147C>A	S716*	stop_gained	MDS	MDS-MLD	4	38319256
E-H-100029-T1-1-D1-1	TET2	c.2746C>T	Q916*	stop_gained	MDS	MDS-MLD	4	38319256
E-H-100029-T1-1-D1-1	SRSF2	c.284C>A	P95H	missense	MDS	MDS-MLD	4	38319256
E-H-100030-T1-1-D1-1	ASXL1	c.1926_1927insG	G646fs*12	frameshift_variant	MDS	MDS-MLD	4	38319256
E-H-100033-T1-1-D1-1	TP53	c.731G>A	G244D	missense	MDS	MDS-EB1	4	38319256
E-H-100035-T1-1-D1-1	SF3B1	c.2098A>G	K700E	missense	MDS	MDS-EB1	4	38319256
[truncated: 15,270 more rows]

## Sheet: Study References
Study ID	Study PMID	Study citation
1	23443460	Walter MJ, et al. Clonal diversity of recurrently mutated genes in myelodysplastic syndromes. Leukemia. 2013 Jun;27(6):1275-82. PMID: 23443460. PMCID: PMC3736571.
2	23634996	Cancer Genome Atlas Research Network; et al. Genomic and epigenomic landscapes of adult de novo acute myeloid leukemia. N Engl J Med. 2013 May 30;368(22):2059-74. PMID: 23634996. PMCID: PMC3767041.
3	24030381	Papaemmanuil E, et al. Clinical and biological implications of driver mutations in myelodysplastic syndromes. Blood. 2013 Nov 21;122(22):3616-27. PMID: 24030381. PMCID: PMC3837510.
4	38319256	Bernard E, et al. Molecular International Prognostic Scoring System for Myelodysplastic Syndromes. NEJM Evid. 2022 Jul;1(7):EVIDoa2200008. PMID: 38319256.
5	25550361	Lindsley RC, et al. Acute myeloid leukemia ontogeny is defined by distinct somatic mutations. Blood. 2015 Feb 26;125(9):1367-76. PMID: 25550361. PMCID: PMC4342352.
6	27959731	Welch JS, et al. TP53 and decitabine in acute myeloid leukemia and myelodysplastic syndromes. N Engl J Med. 2016 Nov 24;375(21):2023-2036. PMID: 27959731. PMCID: PMC5217532.
7	29296803	Tefferi A, et al. Targeted deep sequencing in primary myelofibrosis. Blood Adv. 2016 Nov 30;1(2):105-111. PMID: 29296803. PMCID: PMC5737166.
8	27276561	Papaemmanuil E, et al. Genomic classification and prognosis in acute myeloid leukemia. N Engl J Med. 2016 Jun 9;374(23):2209-2221. PMID: 27276561. PMCID: PMC4979995.
9	28090092	Kim T, et al. The clonal origins of leukemic progression of myelodysplasia. Leukemia. 2017 Sep;31(9):1928-1935. PMID: 28090092.
10	26908133	Merlevede J, et al. Mutation allele burden remains unchanged in chronic myelomonocytic leukaemia responding to hypomethylating agents. Nat Commun. 2016 Feb 24;7:10767. PMID: 26908133. PMCID: PMC4770084.
11	35709710	Menssen AJ, et al. Convergent clonal evolution of signaling gene mutations is a hallmark of myelodysplastic syndrome progression. Blood Cancer Discov. 2022 Jul 6;3(4):330-345. PMID: 35709710; PMCID: PMC9338759.
12	35522837	Guess T, et al. Distinct patterns of clonal evolution drive myelodysplastic syndrome progression to secondary acute myeloid leukemia. Blood Cancer Discov. 2022 Jul 6;3(4):316-329. PMID: 35522837. PMCID: PMC9610896.
13	30207916	Duncavage EJ, et al. Mutation clearance after transplantation for myelodysplastic syndrome. N Engl J Med. 2018 Sep 13;379(11):1028-1041. PMID: 30207916. PMCID: PMC6309244.
14	30333627	Tyner JW, et al. Functional genomic landscape of acute myeloid leukaemia. Nature. 2018 Oct;562(7728):526-531. PMID: 30333627. PMCID: PMC6280667.
15	30327374	McNamara CJ, et al. The mutational landscape of accelerated- and blast-phase myeloproliferative neoplasms impacts patient outcomes. Blood Adv. 2018 Oct 23;2(20):2658-2671. PMID: 30327374. PMCID: PMC6199664.
16	31366621	Zhang H, et al. Genomic landscape of neutrophilic leukemias of ambiguous diagnosis. Blood. 2019 Sep 12;134(11):867-879. PMID: 31366621. PMCID: PMC6742922.
17	30625392	Tamari R, et al. Impact of high-molecular-risk mutations on transplantation outcomes in patients with myelofibrosis. Biol Blood Marrow Transplant. 2019 Jun;25(6):1142-1151. PMID: 30625392. PMCID: PMC6918823.
18	31945802	Tefferi A, et al. Mutation-enhanced international prognostic systems for essential thrombocythaemia and polycythaemia vera. Br J Haematol. 2020 Apr;189(2):291-302. PMID: 31945802.
19	24325359	Nangalia J, et al. Somatic CALR mutations in myeloproliferative neoplasms with nonmutated JAK2. N Engl J Med. 2013 Dec 19;369(25):2391-2405. PMID: 24325359. PMCID: PMC3966280.
20	21909114	Yoshida K, et al. Frequent pathway mutations of splicing machinery in myelodysplasia. Nature. 2011 Sep 11;478(7367):64-9. PMID: 21909114.

## Sheet: Genes assessed
Gene	AML	sAML	MDS	CMML	MPN
ASXL1	X	X	X	X	X
BCOR	X	X	X	X	.
BRAF	X	X	X	X	.
CALR	.	.	.	.	X
CBL	X	X	X	X	X
CEBPA	X	X	X	X	X
CSF3R	.	.	.	.	X
DNMT3A	X	X	X	X	X
ETV6	X	X	X	X	.
EZH2	X	X	X	X	X
FLT3	X	X	X	X	X
GATA2	X	X	X	X	.
GNAS	X	X	X	X	.
IDH1	X	X	X	X	X
IDH2	X	X	X	X	X
JAK2	X	X	X	X	X
KIT	X	X	X	X	X
KRAS	X	X	X	X	.
MPL	.	.	.	.	X
NF1	X	X	X	X	.
NPM1	X	X	X	X	.
NRAS	X	X	X	X	X
PHF6	X	X	X	X	.
PTPN11	X	X	X	X	X
RUNX1	X	X	X	X	X
SETBP1	.	.	.	.	X
SF3B1	X	X	X	X	X
SRSF2	X	X	X	X	X
STAG2	X	X	X	X	.
TET2	X	X	X	X	X
TP53	X	X	X	X	X
U2AF1	X	X	X	X	X
U2AF2	X	X	X	X	.
WT1	X	X	X	X	.
ZRSR2	X	X	X	X	X
