# Supplementary material for: U2af1S34F and U2af1Q157R myeloid neoplasm-associated hotspot mutations induce distinct hematopoietic phenotypes in mice
Source: Research Square preprint supplement (doi:10.21203/rs.3.rs-6377810/v1), 2025-05-07
Supplement: Supplementary file 25 [file Table S20 Co-occurrence and mutual exclusivity analysis from cBioPortal.xlsx]

## Sheet: AML
A	B	Neither	A Not B	B Not A	Both	Log2 Odds Ratio	p-Value	q-Value	Tendency
DNMT3A	NPM1	1131	177	266	283	2.765	<0.001	<0.001	Co-occurrence
NPM1	FLT3	998	249	310	300	1.956	<0.001	<0.001	Co-occurrence
RUNX1	SRSF2	1631	105	75	46	>3	<0.001	<0.001	Co-occurrence
NPM1	RUNX1	1162	544	146	5	<-3	<0.001	<0.001	Mutual exclusivity
CEBPA	GATA2	1699	107	26	25	>3	<0.001	<0.001	Co-occurrence
NPM1	PTPN11	1258	472	50	77	2.037	<0.001	<0.001	Co-occurrence
NPM1	TP53	1210	547	98	2	<-3	<0.001	<0.001	Mutual exclusivity
NRAS	FLT3	1002	245	565	45	-1.618	<0.001	<0.001	Mutual exclusivity
FLT3	TP53	1152	605	95	5	<-3	<0.001	<0.001	Mutual exclusivity
DNMT3A	IDH1	1329	390	68	70	1.811	<0.001	<0.001	Co-occurrence
IDH2	SRSF2	1579	157	83	38	2.203	<0.001	<0.001	Co-occurrence
DNMT3A	FLT3	996	251	401	209	1.048	<0.001	<0.001	Co-occurrence
IDH1	NPM1	1243	65	476	73	1.552	<0.001	<0.001	Co-occurrence
DNMT3A	IDH2	1286	376	111	84	1.372	<0.001	<0.001	Co-occurrence
NPM1	CEBPA	1188	537	120	12	-2.176	<0.001	<0.001	Mutual exclusivity
RUNX1	ASXL1	1650	130	56	21	2.251	<0.001	<0.001	Co-occurrence
RUNX1	BCOR	1674	135	32	16	2.632	<0.001	<0.001	Co-occurrence
CEBPA	WT1	1637	109	88	23	1.973	<0.001	<0.001	Co-occurrence
SRSF2	STAG2	1683	105	53	16	2.275	<0.001	<0.001	Co-occurrence
SRSF2	ASXL1	1676	104	60	17	2.191	<0.001	<0.001	Co-occurrence
IDH2	TET2	1486	192	176	3	-2.922	<0.001	<0.001	Mutual exclusivity
SRSF2	FLT3	1144	103	592	18	-1.566	<0.001	<0.001	Mutual exclusivity
NPM1	TET2	1209	469	99	80	1.059	<0.001	<0.001	Co-occurrence
NPM1	ASXL1	1238	542	70	7	-2.13	<0.001	<0.001	Mutual exclusivity
FLT3	KRAS	1171	599	76	11	-1.821	<0.001	<0.001	Mutual exclusivity
ASXL1	U2AF1_R156_Q157	1774	72	6	5	>3	<0.001	<0.001	Co-occurrence
NRAS	GATA2	1535	271	32	19	1.75	<0.001	0.002	Co-occurrence
FLT3	KIT	1178	599	69	11	-1.673	<0.001	0.003	Mutual exclusivity
CEBPA	FLT3	1139	108	586	24	-1.211	<0.001	0.003	Mutual exclusivity
TET2	STAG2	1626	162	52	17	1.714	<0.001	0.003	Co-occurrence
RUNX1	STAG2	1652	136	54	15	1.755	<0.001	0.005	Co-occurrence
NPM1	U2AF1_S34	1277	548	31	1	<-3	<0.001	0.005	Mutual exclusivity
DNMT3A	CEBPA	1281	444	116	16	-1.329	<0.001	0.006	Mutual exclusivity
IDH2	NRAS	1386	181	276	14	-1.364	<0.001	0.006	Mutual exclusivity
SRSF2	TET2	1581	97	155	24	1.336	<0.001	0.006	Co-occurrence
ASXL1	STAG2	1721	67	59	10	2.122	<0.001	0.006	Co-occurrence
DNMT3A	PTPN11	1319	411	78	49	1.012	<0.001	0.006	Co-occurrence
FLT3	BCOR	1204	605	43	5	-2.112	<0.001	0.007	Mutual exclusivity
STAG2	EZH2	1753	62	35	7	2.499	<0.001	0.01	Co-occurrence
SRSF2	BCOR	1698	111	38	10	2.009	<0.001	0.01	Co-occurrence
RUNX1	CEBPA	1576	149	130	2	-2.619	0.001	0.02	Mutual exclusivity
IDH2	CEBPA	1534	191	128	4	-1.994	0.002	0.023	Mutual exclusivity
DNMT3A	ASXL1	1328	452	69	8	-1.554	0.002	0.023	Mutual exclusivity
IDH2	TP53	1564	193	98	2	-2.596	0.002	0.026	Mutual exclusivity
DNMT3A	SRSF2	1292	444	105	16	-1.173	0.002	0.026	Mutual exclusivity
PTPN11	RUNX1	1581	125	149	2	-2.558	0.002	0.026	Mutual exclusivity
ASXL1	BCOR	1739	70	41	7	2.085	0.003	0.036	Co-occurrence
NPM1	EZH2	1270	545	38	4	-2.027	0.003	0.036	Mutual exclusivity
DNMT3A	KIT	1326	451	71	9	-1.424	0.003	0.038	Mutual exclusivity
TET2	ZRSR2	1671	174	7	5	2.778	0.004	0.039	Co-occurrence
TP53	WT1	1646	100	111	0	<-3	0.004	0.039	Mutual exclusivity
IDH1	IDH2	1529	133	190	5	-1.725	0.004	0.039	Mutual exclusivity
STAG2	GNAS	1787	67	1	2	>3	0.004	0.042	Co-occurrence
KRAS	ETV6	1751	82	19	5	2.49	0.004	0.044	Co-occurrence
DNMT3A	WT1	1301	445	96	15	-1.13	0.004	0.044	Mutual exclusivity
TET2	CBL	1652	170	26	9	1.75	0.005	0.045	Co-occurrence
ASXL1	CEBPA	1648	77	132	0	<-3	0.005	0.053	Mutual exclusivity
IDH1	TP53	1620	137	99	1	<-3	0.006	0.053	Mutual exclusivity
CBL	SF3B1	1786	31	36	4	2.678	0.006	0.056	Co-occurrence
IDH2	FLT3	1099	148	563	47	-0.69	0.006	0.056	Mutual exclusivity
IDH2	ASXL1	1601	179	61	16	1.23	0.006	0.06	Co-occurrence
ASXL1	EZH2	1744	71	36	6	2.033	0.007	0.06	Co-occurrence
STAG2	BCOR	1746	63	42	6	1.985	0.008	0.067	Co-occurrence
NPM1	KIT	1241	536	67	13	-1.154	0.008	0.071	Mutual exclusivity
NPM1	BCOR	1266	543	42	6	-1.586	0.009	0.081	Mutual exclusivity
IDH1	SRSF2	1615	121	104	17	1.125	0.01	0.089	Co-occurrence
FLT3	WT1	1185	561	62	49	0.739	0.012	0.1	Co-occurrence
SRSF2	GNAS	1735	119	1	2	>3	0.012	0.1	Co-occurrence
NPM1	IDH2	1186	476	122	73	0.576	0.013	0.104	Co-occurrence
TP53	KRAS	1670	100	87	0	<-3	0.013	0.104	Mutual exclusivity
IDH1	PTPN11	1609	121	110	17	1.039	0.013	0.104	Co-occurrence
IDH2	BCOR	1625	184	37	11	1.393	0.013	0.104	Co-occurrence
SF3B1	ETV6	1796	37	21	3	2.794	0.014	0.104	Co-occurrence
IDH2	KIT	1584	193	78	2	-2.249	0.014	0.104	Mutual exclusivity
NPM1	SF3B1	1273	544	35	5	-1.581	0.014	0.104	Mutual exclusivity
IDH1	WT1	1610	136	109	2	-2.203	0.014	0.104	Mutual exclusivity
PTPN11	SRSF2	1611	125	119	2	-2.207	0.014	0.104	Mutual exclusivity
NRAS	KRAS	1502	268	65	22	0.924	0.015	0.109	Co-occurrence
RUNX1	JAK2	1697	147	9	4	2.359	0.017	0.119	Co-occurrence
NPM1	SRSF2	1211	525	97	24	-0.809	0.017	0.122	Mutual exclusivity
IDH2	U2AF1_R156_Q157	1655	191	7	4	2.308	0.022	0.149	Co-occurrence
NPM1	ETV6	1286	547	22	2	-2.226	0.023	0.154	Mutual exclusivity
PTPN11	FLT3	1150	97	580	30	-0.706	0.024	0.161	Mutual exclusivity
U2AF1_R156_Q157	EZH2	1806	9	40	2	>3	0.024	0.161	Co-occurrence
PHF6	BCOR	1769	40	44	4	2.007	0.025	0.163	Co-occurrence
ASXL1	FLT3	1186	61	594	16	-0.933	0.025	0.163	Mutual exclusivity
ETV6	U2AF1_both	1832	23	1	1	>3	0.026	0.166	Co-occurrence
WT1	U2AF1_other	1743	109	3	2	>3	0.031	0.2	Co-occurrence
KIT	EZH2	1740	75	37	5	1.649	0.032	0.201	Co-occurrence
EZH2	JAK2	1804	40	11	2	>3	0.033	0.207	Co-occurrence
U2AF1_R156_Q157	GATA2	1797	9	49	2	>3	0.035	0.214	Co-occurrence
IDH2	WT1	1556	190	106	5	-1.372	0.036	0.219	Mutual exclusivity
IDH2	RUNX1	1535	171	127	24	0.762	0.036	0.219	Co-occurrence
PHF6	U2AF1_S34	1784	41	29	3	2.17	0.038	0.228	Co-occurrence
RUNX1	SF3B1	1673	144	33	7	1.301	0.039	0.229	Co-occurrence
PTPN11	KIT	1651	126	79	1	-2.592	0.04	0.231	Mutual exclusivity
NPM1	U2AF1_R156_Q157	1297	549	11	0	<-3	0.041	0.234	Mutual exclusivity
SRSF2	CEBPA	1607	118	129	3	-1.659	0.042	0.241	Mutual exclusivity
CBL	EZH2	1783	32	39	3	2.1	0.043	0.241	Co-occurrence
PTPN11	NRAS	1468	99	262	28	0.664	0.043	0.241	Co-occurrence
SRSF2	WT1	1627	119	109	2	-1.995	0.044	0.243	Mutual exclusivity
FLT3	NF1	1218	604	29	6	-1.261	0.047	0.257	Mutual exclusivity
U2AF1_S34	BCOR	1780	29	45	3	2.033	0.048	0.257	Co-occurrence
SRSF2	JAK2	1726	118	10	3	2.134	0.048	0.257	Co-occurrence
U2AF1_S34	U2AF2	1823	31	2	1	>3	0.051	0.27	Co-occurrence
BCOR	U2AF1_both	1808	47	1	1	>3	0.051	0.27	Co-occurrence
RUNX1	U2AF1_R156_Q157	1698	148	8	3	2.105	0.054	0.281	Co-occurrence
GATA2	U2AF1_both	1805	50	1	1	>3	0.054	0.281	Co-occurrence
RUNX1	TP53	1609	148	97	3	-1.572	0.058	0.298	Mutual exclusivity
SRSF2	KIT	1657	120	79	1	-2.516	0.059	0.298	Mutual exclusivity
KRAS	U2AF1_S34	1742	83	28	4	1.584	0.059	0.298	Co-occurrence
BCOR	NF1	1777	45	32	3	1.888	0.059	0.298	Co-occurrence
SRSF2	TP53	1638	119	98	2	-1.832	0.06	0.299	Mutual exclusivity
NPM1	GATA2	1266	540	42	9	-0.993	0.062	0.306	Mutual exclusivity
U2AF1_S34	ETV6	1803	30	22	2	2.45	0.063	0.306	Co-occurrence
CEBPA	TET2	1565	113	160	19	0.718	0.065	0.313	Co-occurrence
NRAS	TP53	1476	281	91	9	-0.945	0.065	0.313	Mutual exclusivity
TET2	WT1	1572	174	106	5	-1.231	0.066	0.316	Mutual exclusivity
IDH1	SF3B1	1679	138	40	0	<-3	0.069	0.324	Mutual exclusivity
IDH2	STAG2	1605	183	57	12	0.885	0.069	0.324	Co-occurrence
IDH1	TET2	1547	131	172	7	-1.057	0.07	0.326	Mutual exclusivity
DNMT3A	TP53	1314	443	83	17	-0.719	0.074	0.338	Mutual exclusivity
U2AF1_R156_Q157	JAK2	1834	10	12	1	>3	0.075	0.34	Co-occurrence
RUNX1	EZH2	1671	144	35	7	1.215	0.076	0.345	Co-occurrence
STAG2	PHF6	1748	65	40	4	1.427	0.078	0.347	Co-occurrence
NRAS	U2AF1_R156_Q157	1560	286	7	4	1.64	0.078	0.347	Co-occurrence
JAK2	ZRSR2	1833	12	11	1	>3	0.081	0.356	Co-occurrence
ASXL1	U2AF1_both	1779	76	1	1	>3	0.081	0.356	Co-occurrence
RUNX1	PHF6	1669	144	37	7	1.133	0.084	0.364	Co-occurrence
ASXL1	ZRSR2	1770	75	10	2	2.239	0.086	0.369	Co-occurrence
ASXL1	KRAS	1700	70	80	7	1.087	0.088	0.377	Co-occurrence
DNMT3A	STAG2	1339	449	58	11	-0.822	0.089	0.378	Mutual exclusivity
NRAS	STAG2	1514	274	53	16	0.738	0.09	0.378	Co-occurrence
SRSF2	NRAS	1458	109	278	12	-0.792	0.091	0.378	Mutual exclusivity
DNMT3A	ETV6	1375	458	22	2	-1.873	0.092	0.378	Mutual exclusivity
KRAS	U2AF1_both	1769	86	1	1	>3	0.092	0.378	Co-occurrence
DNMT3A	SF3B1	1362	455	35	5	-1.226	0.093	0.382	Mutual exclusivity
FLT3	GATA2	1207	599	40	11	-0.852	0.096	0.391	Mutual exclusivity
DNMT3A	NRAS	1190	377	207	83	0.34	0.103	0.418	Co-occurrence
KRAS	ZRSR2	1760	85	10	2	2.05	0.106	0.421	Co-occurrence
NPM1	STAG2	1253	535	55	14	-0.746	0.106	0.421	Mutual exclusivity
SRSF2	SF3B1	1696	121	40	0	<-3	0.107	0.421	Mutual exclusivity
STAG2	U2AF2	1786	68	2	1	>3	0.107	0.421	Co-occurrence
ETV6	BRAF	1825	23	8	1	>3	0.111	0.431	Co-occurrence
TET2	EZH2	1643	172	35	7	0.934	0.116	0.449	Co-occurrence
ASXL1	GNAS	1778	76	2	1	>3	0.119	0.456	Co-occurrence
IDH1	CEBPA	1592	133	127	5	-1.085	0.119	0.456	Mutual exclusivity
IDH1	KIT	1641	136	78	2	-1.693	0.122	0.462	Mutual exclusivity
TP53	KIT	1678	99	79	1	-2.221	0.124	0.468	Mutual exclusivity
RUNX1	FLT3	1137	110	569	41	-0.425	0.125	0.468	Mutual exclusivity
GATA2	U2AF1_other	1802	50	4	1	>3	0.13	0.483	Co-occurrence
U2AF1_R156_Q157	ETV6	1823	10	23	1	2.987	0.134	0.491	Co-occurrence
KRAS	U2AF2	1768	86	2	1	>3	0.134	0.491	Co-occurrence
FLT3	EZH2	1214	601	33	9	-0.86	0.135	0.491	Mutual exclusivity
NRAS	EZH2	1535	280	32	10	0.777	0.136	0.492	Co-occurrence
CBL	STAG2	1756	32	66	3	1.319	0.138	0.495	Co-occurrence
NRAS	PHF6	1526	287	41	3	-1.362	0.139	0.495	Mutual exclusivity
IDH1	NRAS	1457	110	262	28	0.501	0.142	0.503	Co-occurrence
BCOR	GATA2	1761	45	48	3	1.29	0.143	0.503	Co-occurrence
DNMT3A	EZH2	1361	454	36	6	-1.001	0.147	0.514	Mutual exclusivity
KRAS	PHF6	1730	83	40	4	1.06	0.148	0.514	Co-occurrence
TP53	JAK2	1746	98	11	2	1.696	0.152	0.525	Co-occurrence
WT1	NF1	1715	107	31	4	1.048	0.153	0.525	Co-occurrence
DNMT3A	U2AF2	1396	458	1	2	2.608	0.154	0.525	Co-occurrence
RUNX1	U2AF1_both	1705	150	1	1	>3	0.156	0.531	Co-occurrence
TET2	ETV6	1654	179	24	0	<-3	0.16	0.541	Mutual exclusivity
IDH2	GATA2	1613	193	49	2	-1.552	0.162	0.544	Mutual exclusivity
CEBPA	U2AF1_S34	1693	132	32	0	<-3	0.164	0.548	Mutual exclusivity
ASXL1	TET2	1612	66	168	11	0.677	0.166	0.548	Co-occurrence
IDH1	U2AF1_S34	1687	138	32	0	<-3	0.166	0.548	Mutual exclusivity
DNMT3A	RUNX1	1276	430	121	30	-0.443	0.168	0.551	Mutual exclusivity
TP53	PHF6	1713	100	44	0	<-3	0.169	0.551	Mutual exclusivity
CEBPA	NF1	1690	132	35	0	<-3	0.172	0.556	Mutual exclusivity
WT1	EZH2	1704	111	42	0	<-3	0.175	0.558	Mutual exclusivity
ASXL1	CBL	1748	74	32	3	1.147	0.175	0.558	Co-occurrence
IDH1	GATA2	1669	137	50	1	-2.037	0.175	0.558	Mutual exclusivity
KRAS	KIT	1691	86	79	1	-2.006	0.178	0.562	Mutual exclusivity
SF3B1	BRAF	1809	39	8	1	2.536	0.178	0.562	Co-occurrence
EZH2	BRAF	1807	41	8	1	2.462	0.186	0.584	Co-occurrence
CBL	U2AF1_R156_Q157	1812	34	10	1	2.414	0.189	0.586	Co-occurrence
U2AF1_R156_Q157	NF1	1812	10	34	1	2.414	0.189	0.586	Co-occurrence
NPM1	CBL	1287	535	21	14	0.681	0.191	0.586	Co-occurrence
ASXL1	U2AF1_other	1776	76	4	1	2.546	0.191	0.586	Co-occurrence
IDH1	U2AF1_R156_Q157	1710	136	9	2	1.482	0.194	0.593	Co-occurrence
KIT	U2AF1_other	1773	79	4	1	2.488	0.198	0.598	Co-occurrence
CEBPA	U2AF2	1723	131	2	1	2.717	0.199	0.598	Co-occurrence
RUNX1	NF1	1676	146	30	5	0.936	0.2	0.598	Co-occurrence
PHF6	NF1	1780	42	33	2	1.361	0.2	0.598	Co-occurrence
U2AF1_S34	JAK2	1813	31	12	1	2.285	0.203	0.602	Co-occurrence
NF1	ZRSR2	1811	34	11	1	2.276	0.205	0.604	Co-occurrence
RUNX1	WT1	1600	146	106	5	-0.952	0.207	0.606	Mutual exclusivity
PTPN11	CEBPA	1603	122	127	5	-0.951	0.207	0.606	Mutual exclusivity
TET2	BRAF	1671	177	7	2	1.432	0.213	0.617	Co-occurrence
KRAS	U2AF1_other	1766	86	4	1	2.36	0.214	0.617	Co-occurrence
CEBPA	EZH2	1688	127	37	5	0.845	0.217	0.625	Co-occurrence
GATA2	BRAF	1798	50	8	1	2.168	0.222	0.636	Co-occurrence
RUNX1	GNAS	1704	150	2	1	2.506	0.225	0.64	Co-occurrence
WT1	GATA2	1700	106	46	5	0.802	0.227	0.642	Co-occurrence
PHF6	U2AF1_R156_Q157	1803	43	10	1	2.068	0.232	0.655	Co-occurrence
EZH2	ZRSR2	1804	41	11	1	2	0.241	0.67	Co-occurrence
NPM1	PHF6	1273	540	35	9	-0.722	0.241	0.67	Mutual exclusivity
FLT3	TET2	1134	544	113	66	0.284	0.241	0.67	Co-occurrence
IDH2	U2AF1_S34	1631	194	31	1	-1.883	0.245	0.676	Mutual exclusivity
TP53	U2AF1_S34	1728	97	29	3	0.882	0.246	0.676	Co-occurrence
NF1	GATA2	1773	33	49	2	1.133	0.25	0.677	Co-occurrence
FLT3	U2AF2	1246	608	1	2	2.035	0.253	0.677	Co-occurrence
SRSF2	GATA2	1686	120	50	1	-1.831	0.253	0.677	Mutual exclusivity
CEBPA	BCOR	1678	131	47	1	-1.875	0.253	0.677	Mutual exclusivity
FLT3	U2AF1_S34	1222	603	25	7	-0.817	0.254	0.677	Mutual exclusivity
IDH1	RUNX1	1583	123	136	15	0.505	0.254	0.677	Co-occurrence
RUNX1	ZRSR2	1696	149	10	2	1.187	0.255	0.677	Co-occurrence
WT1	U2AF1_S34	1714	111	32	0	<-3	0.257	0.677	Mutual exclusivity
TP53	CBL	1722	100	35	0	<-3	0.257	0.677	Mutual exclusivity
PHF6	KIT	1733	44	80	0	<-3	0.259	0.678	Mutual exclusivity
ASXL1	ETV6	1758	75	22	2	1.091	0.262	0.681	Co-occurrence
PHF6	EZH2	1773	42	40	2	1.078	0.262	0.681	Co-occurrence
SRSF2	U2AF1_S34	1704	121	32	0	<-3	0.265	0.684	Mutual exclusivity
FLT3	ETV6	1228	605	19	5	-0.905	0.275	0.708	Mutual exclusivity
KRAS	BCOR	1726	83	44	4	0.919	0.281	0.719	Co-occurrence
SRSF2	CBL	1705	117	31	4	0.911	0.283	0.719	Co-occurrence
IDH2	GNAS	1660	194	2	1	2.097	0.283	0.719	Co-occurrence
STAG2	BRAF	1780	68	8	1	1.71	0.289	0.731	Co-occurrence
TET2	TP53	1584	173	94	6	-0.775	0.293	0.738	Mutual exclusivity
BCOR	EZH2	1769	46	40	2	0.943	0.296	0.742	Co-occurrence
GATA2	SF3B1	1768	49	38	2	0.925	0.301	0.751	Co-occurrence
DNMT3A	U2AF1_R156_Q157	1387	459	10	1	-1.727	0.311	0.772	Mutual exclusivity
NRAS	BCOR	1529	280	38	10	0.523	0.314	0.772	Co-occurrence
CEBPA	TP53	1629	128	96	4	-0.915	0.314	0.772	Mutual exclusivity
ASXL1	BRAF	1772	76	8	1	1.543	0.317	0.778	Co-occurrence
ASXL1	WT1	1671	75	109	2	-1.291	0.321	0.78	Mutual exclusivity
DNMT3A	GATA2	1355	451	42	9	-0.635	0.323	0.78	Mutual exclusivity
PTPN11	STAG2	1668	120	62	7	0.65	0.324	0.78	Co-occurrence
RUNX1	U2AF1_S34	1678	147	28	4	0.705	0.324	0.78	Co-occurrence
NRAS	TET2	1411	267	156	23	-0.36	0.33	0.78	Mutual exclusivity
FLT3	PHF6	1214	599	33	11	-0.566	0.33	0.78	Mutual exclusivity
NPM1	U2AF1_other	1303	549	5	0	<-3	0.33	0.78	Mutual exclusivity
DNMT3A	CBL	1368	454	29	6	-0.682	0.331	0.78	Mutual exclusivity
WT1	PHF6	1706	107	40	4	0.673	0.331	0.78	Co-occurrence
DNMT3A	U2AF1_other	1392	460	5	0	<-3	0.341	0.798	Mutual exclusivity
STAG2	U2AF1_R156_Q157	1778	68	10	1	1.387	0.341	0.798	Co-occurrence
RUNX1	U2AF1_other	1702	150	4	1	1.504	0.346	0.804	Co-occurrence
NRAS	NF1	1535	287	32	3	-0.996	0.347	0.804	Mutual exclusivity
CEBPA	SF3B1	1686	131	39	1	-1.599	0.359	0.824	Mutual exclusivity
PTPN11	EZH2	1689	126	41	1	-1.613	0.36	0.824	Mutual exclusivity
SRSF2	PHF6	1693	120	43	1	-1.608	0.361	0.824	Mutual exclusivity
TET2	JAK2	1667	177	11	2	0.776	0.361	0.824	Co-occurrence
STAG2	ZRSR2	1777	68	11	1	1.248	0.366	0.824	Co-occurrence
NPM1	JAK2	1297	547	11	2	-1.214	0.367	0.824	Mutual exclusivity
IDH2	KRAS	1581	189	81	6	-0.691	0.368	0.824	Mutual exclusivity
NF1	ETV6	1799	34	23	1	1.202	0.368	0.824	Co-occurrence
CEBPA	KIT	1648	129	77	3	-1.007	0.369	0.824	Mutual exclusivity
DNMT3A	PHF6	1361	452	36	8	-0.58	0.378	0.842	Mutual exclusivity
PTPN11	KRAS	1651	119	79	8	0.491	0.38	0.843	Co-occurrence
CEBPA	NRAS	1459	108	266	24	0.286	0.385	0.85	Co-occurrence
NRAS	SF3B1	1535	282	32	8	0.444	0.386	0.85	Co-occurrence
TP53	BRAF	1749	99	8	1	1.143	0.393	0.861	Co-occurrence
NRAS	GNAS	1565	289	2	1	1.437	0.399	0.87	Co-occurrence
NPM1	NRAS	1110	457	198	92	0.174	0.401	0.87	Co-occurrence
NPM1	KRAS	1243	527	65	22	-0.325	0.402	0.87	Mutual exclusivity
IDH2	CBL	1632	190	30	5	0.518	0.406	0.877	Co-occurrence
TET2	SF3B1	1640	177	38	2	-1.036	0.424	0.903	Mutual exclusivity
ASXL1	JAK2	1768	76	12	1	0.955	0.424	0.903	Co-occurrence
EZH2	ETV6	1792	41	23	1	0.926	0.424	0.903	Co-occurrence
ASXL1	PHF6	1739	74	41	3	0.782	0.426	0.903	Co-occurrence
WT1	BRAF	1738	110	8	1	0.982	0.426	0.903	Co-occurrence
DNMT3A	NF1	1373	449	24	11	0.487	0.428	0.903	Co-occurrence
DNMT3A	U2AF1_both	1396	459	1	1	1.605	0.434	0.909	Co-occurrence
ASXL1	TP53	1682	75	98	2	-1.128	0.434	0.909	Mutual exclusivity
PTPN11	WT1	1624	122	106	5	-0.671	0.436	0.91	Mutual exclusivity
PHF6	ETV6	1790	43	23	1	0.856	0.44	0.913	Co-occurrence
KRAS	EZH2	1731	84	39	3	0.665	0.444	0.92	Co-occurrence
NPM1	WT1	1226	520	82	29	-0.262	0.454	0.936	Mutual exclusivity
CBL	U2AF1_S34	1791	34	31	1	0.765	0.459	0.941	Co-occurrence
TET2	KRAS	1597	173	81	6	-0.548	0.459	0.941	Mutual exclusivity
KRAS	JAK2	1758	86	12	1	0.768	0.465	0.948	Co-occurrence
DNMT3A	BRAF	1389	459	8	1	-1.403	0.466	0.948	Mutual exclusivity
FLT3	CBL	1221	601	26	9	-0.508	0.468	0.948	Mutual exclusivity
PTPN11	BRAF	1722	126	8	1	0.773	0.472	0.953	Co-occurrence
TET2	GATA2	1630	176	48	3	-0.789	0.474	0.953	Mutual exclusivity
PTPN11	U2AF1_S34	1701	124	29	3	0.505	0.478	0.957	Co-occurrence
IDH1	STAG2	1653	135	66	3	-0.845	0.48	0.958	Mutual exclusivity
PTPN11	ASXL1	1656	124	74	3	-0.885	0.485	0.964	Mutual exclusivity
GATA2	ETV6	1783	50	23	1	0.633	0.49	0.971	Co-occurrence
IDH2	ETV6	1639	194	23	1	-1.445	0.504	0.993	Mutual exclusivity
CEBPA	CBL	1691	131	34	1	-1.397	0.51	0.993	Mutual exclusivity
PTPN11	NF1	1696	126	34	1	-1.337	0.51	0.993	Mutual exclusivity
WT1	SF3B1	1707	110	39	1	-1.33	0.512	0.993	Mutual exclusivity
IDH1	CBL	1685	137	34	1	-1.467	0.512	0.993	Mutual exclusivity
IDH1	NF1	1685	137	34	1	-1.467	0.512	0.993	Mutual exclusivity
KRAS	GATA2	1720	86	50	1	-1.322	0.513	0.993	Mutual exclusivity
FLT3	STAG2	1198	590	49	20	-0.271	0.517	0.993	Mutual exclusivity
CEBPA	KRAS	1642	128	83	4	-0.694	0.519	0.993	Mutual exclusivity
SRSF2	EZH2	1695	120	41	1	-1.537	0.519	0.993	Mutual exclusivity
ASXL1	NRAS	1504	63	276	14	0.276	0.521	0.993	Co-occurrence
DNMT3A	TET2	1266	412	131	48	0.171	0.524	0.993	Co-occurrence
RUNX1	CBL	1675	147	31	4	0.556	0.524	0.993	Co-occurrence
WT1	BCOR	1702	107	44	4	0.532	0.528	0.998	Co-occurrence
RUNX1	BRAF	1698	150	8	1	0.501	0.535	1	Co-occurrence
PTPN11	PHF6	1690	123	40	4	0.458	0.538	1	Co-occurrence
TET2	U2AF1_S34	1650	175	28	4	0.43	0.542	1	Co-occurrence
NF1	EZH2	1781	34	41	1	0.353	0.554	1	Co-occurrence
FLT3	GNAS	1244	610	3	0	<-3	0.555	1	Mutual exclusivity
NPM1	U2AF2	1305	549	3	0	<-3	0.56	1	Mutual exclusivity
NPM1	GNAS	1305	549	3	0	<-3	0.56	1	Mutual exclusivity
IDH1	PHF6	1679	134	40	4	0.325	0.564	1	Co-occurrence
PTPN11	BCOR	1686	123	44	4	0.317	0.566	1	Co-occurrence
CBL	PHF6	1779	34	43	1	0.283	0.571	1	Co-occurrence
IDH1	FLT3	1151	96	568	42	-0.174	0.573	1	Mutual exclusivity
CEBPA	ZRSR2	1714	131	11	1	0.25	0.588	1	Co-occurrence
IDH2	BRAF	1653	195	9	0	<-3	0.61	1	Mutual exclusivity
TET2	U2AF1_R156_Q157	1667	179	11	0	<-3	0.614	1	Mutual exclusivity
IDH1	JAK2	1706	138	13	0	<-3	0.616	1	Mutual exclusivity
CEBPA	JAK2	1712	132	13	0	<-3	0.617	1	Mutual exclusivity
IDH2	PHF6	1621	192	41	3	-0.695	0.618	1	Mutual exclusivity
PHF6	SF3B1	1774	43	39	1	0.081	0.621	1	Co-occurrence
KIT	ETV6	1753	80	24	0	<-3	0.622	1	Mutual exclusivity
PHF6	GATA2	1762	44	51	0	<-3	0.632	1	Mutual exclusivity
IDH2	JAK2	1651	193	11	2	0.637	0.639	1	Co-occurrence
PTPN11	TET2	1561	117	169	10	-0.341	0.639	1	Mutual exclusivity
SRSF2	KRAS	1653	117	83	4	-0.555	0.655	1	Mutual exclusivity
IDH1	ASXL1	1646	134	73	4	-0.571	0.655	1	Mutual exclusivity
SRSF2	ETV6	1714	119	22	2	0.389	0.667	1	Co-occurrence
IDH1	KRAS	1637	133	82	5	-0.414	0.677	1	Mutual exclusivity
KIT	SF3B1	1739	78	38	2	0.231	0.69	1	Co-occurrence
NRAS	JAK2	1555	289	12	1	-1.157	0.705	1	Mutual exclusivity
KRAS	SF3B1	1732	85	38	2	0.101	0.711	1	Co-occurrence
TP53	NF1	1724	98	33	2	0.092	0.713	1	Co-occurrence
STAG2	GATA2	1739	67	49	2	0.083	0.714	1	Co-occurrence
RUNX1	ETV6	1683	150	23	1	-1.036	0.716	1	Mutual exclusivity
CBL	WT1	1712	34	110	1	-1.127	0.719	1	Mutual exclusivity
BCOR	KIT	1730	47	79	1	-1.102	0.72	1	Mutual exclusivity
SRSF2	NF1	1702	120	34	1	-1.261	0.724	1	Mutual exclusivity
TP53	EZH2	1716	99	41	1	-1.242	0.725	1	Mutual exclusivity
RUNX1	NRAS	1441	126	265	25	0.11	0.726	1	Co-occurrence
FLT3	BRAF	1240	608	7	2	-0.779	0.726	1	Mutual exclusivity
NPM1	BRAF	1302	546	6	3	0.254	0.729	1	Co-occurrence
DNMT3A	BCOR	1362	447	35	13	0.179	0.735	1	Co-occurrence
DNMT3A	ZRSR2	1387	458	10	2	-0.723	0.741	1	Mutual exclusivity
DNMT3A	JAK2	1386	458	11	2	-0.862	0.747	1	Mutual exclusivity
TP53	GATA2	1709	97	48	3	0.139	0.753	1	Co-occurrence
CEBPA	PHF6	1683	130	42	2	-0.698	0.766	1	Mutual exclusivity
STAG2	KIT	1710	67	78	2	-0.612	0.767	1	Mutual exclusivity
STAG2	KRAS	1703	67	85	2	-0.742	0.769	1	Mutual exclusivity
TET2	NF1	1647	175	31	4	0.28	0.769	1	Co-occurrence
PTPN11	GATA2	1683	123	47	4	0.22	0.775	1	Co-occurrence
IDH1	BCOR	1675	134	44	4	0.184	0.778	1	Co-occurrence
NRAS	ETV6	1547	286	20	4	0.113	0.781	1	Co-occurrence
TP53	STAG2	1692	96	65	4	0.117	0.785	1	Co-occurrence
NRAS	WT1	1472	274	95	16	-0.144	0.789	1	Mutual exclusivity
IDH2	SF3B1	1625	192	37	3	-0.543	0.793	1	Mutual exclusivity
RUNX1	GATA2	1658	148	48	3	-0.514	0.794	1	Mutual exclusivity
TET2	BCOR	1635	174	43	5	0.128	0.804	1	Co-occurrence
NRAS	CBL	1538	284	29	6	0.164	0.814	1	Co-occurrence
KRAS	WT1	1663	83	107	4	-0.417	0.816	1	Mutual exclusivity
DNMT3A	U2AF1_S34	1372	453	25	7	-0.238	0.838	1	Mutual exclusivity
TET2	KIT	1606	171	72	8	0.061	0.847	1	Co-occurrence
NPM1	NF1	1284	538	24	11	0.129	0.852	1	Co-occurrence
FLT3	SF3B1	1219	598	28	12	-0.195	0.865	1	Mutual exclusivity
NRAS	KIT	1500	277	67	13	0.071	0.875	1	Co-occurrence
PTPN11	IDH2	1549	113	181	14	0.084	0.881	1	Co-occurrence
DNMT3A	KRAS	1332	438	65	22	0.042	0.899	1	Co-occurrence
RUNX1	TET2	1541	137	165	14	-0.067	1	1	Mutual exclusivity
SF3B1	ZRSR2	1805	40	12	0	<-3	1	1	Mutual exclusivity
TET2	PHF6	1638	175	40	4	-0.095	1	1	Mutual exclusivity
U2AF1_R156_Q157	ZRSR2	1834	11	12	0	<-3	1	1	Mutual exclusivity
FLT3	U2AF1_R156_Q157	1239	607	8	3	-0.386	1	1	Mutual exclusivity
FLT3	ZRSR2	1239	606	8	4	0.032	1	1	Co-occurrence
CBL	NF1	1787	35	35	0	<-3	1	1	Mutual exclusivity
TP53	ZRSR2	1745	100	12	0	<-3	1	1	Mutual exclusivity
U2AF1_R156_Q157	BRAF	1837	11	9	0	<-3	1	1	Mutual exclusivity
WT1	ZRSR2	1734	111	12	0	<-3	1	1	Mutual exclusivity
NRAS	U2AF1_both	1565	290	2	0	<-3	1	1	Mutual exclusivity
KRAS	U2AF1_R156_Q157	1759	87	11	0	<-3	1	1	Mutual exclusivity
U2AF1_S34	EZH2	1783	32	42	0	<-3	1	1	Mutual exclusivity
EZH2	U2AF1_both	1813	42	2	0	<-3	1	1	Mutual exclusivity
NF1	SF3B1	1782	35	40	0	<-3	1	1	Mutual exclusivity
IDH2	ZRSR2	1651	194	11	1	-0.37	1	1	Mutual exclusivity
ZRSR2	BRAF	1836	12	9	0	<-3	1	1	Mutual exclusivity
BCOR	ZRSR2	1797	48	12	0	<-3	1	1	Mutual exclusivity
U2AF1_S34	ZRSR2	1813	32	12	0	<-3	1	1	Mutual exclusivity
SF3B1	U2AF1_both	1815	40	2	0	<-3	1	1	Mutual exclusivity
NPM1	ZRSR2	1299	546	9	3	-0.335	1	1	Mutual exclusivity
FLT3	JAK2	1238	606	9	4	-0.139	1	1	Mutual exclusivity
PHF6	U2AF1_both	1811	44	2	0	<-3	1	1	Mutual exclusivity
KIT	NF1	1743	79	34	1	-0.624	1	1	Mutual exclusivity
RUNX1	KRAS	1626	144	80	7	-0.017	1	1	Mutual exclusivity
KIT	ZRSR2	1765	80	12	0	<-3	1	1	Mutual exclusivity
FLT3	U2AF1_other	1243	609	4	1	-0.971	1	1	Mutual exclusivity
BRAF	U2AF1_both	1846	9	2	0	<-3	1	1	Mutual exclusivity
IDH2	NF1	1630	192	32	3	-0.329	1	1	Mutual exclusivity
SF3B1	EZH2	1775	40	42	0	<-3	1	1	Mutual exclusivity
ZRSR2	U2AF1_both	1843	12	2	0	<-3	1	1	Mutual exclusivity
PHF6	ZRSR2	1801	44	12	0	<-3	1	1	Mutual exclusivity
IDH1	U2AF1_both	1717	138	2	0	<-3	1	1	Mutual exclusivity
KIT	U2AF1_R156_Q157	1766	80	11	0	<-3	1	1	Mutual exclusivity
SF3B1	U2AF1_other	1812	40	5	0	<-3	1	1	Mutual exclusivity
ZRSR2	U2AF1_other	1840	12	5	0	<-3	1	1	Mutual exclusivity
SRSF2	U2AF1_other	1731	121	5	0	<-3	1	1	Mutual exclusivity
IDH1	ZRSR2	1707	138	12	0	<-3	1	1	Mutual exclusivity
SRSF2	U2AF1_both	1734	121	2	0	<-3	1	1	Mutual exclusivity
U2AF1_S34	U2AF1_R156_Q157	1814	32	11	0	<-3	1	1	Mutual exclusivity
KRAS	BRAF	1761	87	9	0	<-3	1	1	Mutual exclusivity
U2AF2	ZRSR2	1842	3	12	0	<-3	1	1	Mutual exclusivity
RUNX1	KIT	1632	145	74	6	-0.132	1	1	Mutual exclusivity
CBL	KRAS	1736	34	86	1	-0.752	1	1	Mutual exclusivity
KRAS	NF1	1736	86	34	1	-0.752	1	1	Mutual exclusivity
PTPN11	U2AF1_both	1728	127	2	0	<-3	1	1	Mutual exclusivity
CEBPA	U2AF1_both	1723	132	2	0	<-3	1	1	Mutual exclusivity
ASXL1	NF1	1746	76	34	1	-0.566	1	1	Mutual exclusivity
IDH2	U2AF1_other	1657	195	5	0	<-3	1	1	Mutual exclusivity
NRAS	ZRSR2	1557	288	10	2	0.113	1	1	Co-occurrence
SF3B1	JAK2	1804	40	13	0	<-3	1	1	Mutual exclusivity
SRSF2	BRAF	1727	121	9	0	<-3	1	1	Mutual exclusivity
JAK2	BRAF	1835	13	9	0	<-3	1	1	Mutual exclusivity
PTPN11	TP53	1636	121	94	6	-0.213	1	1	Mutual exclusivity
U2AF1_S34	NF1	1790	32	35	0	<-3	1	1	Mutual exclusivity
TP53	U2AF1_both	1755	100	2	0	<-3	1	1	Mutual exclusivity
SRSF2	ZRSR2	1724	121	12	0	<-3	1	1	Mutual exclusivity
U2AF1_R156_Q157	SF3B1	1806	11	40	0	<-3	1	1	Mutual exclusivity
JAK2	U2AF1_both	1842	13	2	0	<-3	1	1	Mutual exclusivity
CBL	BRAF	1813	35	9	0	<-3	1	1	Mutual exclusivity
NF1	BRAF	1813	35	9	0	<-3	1	1	Mutual exclusivity
U2AF1_other	BRAF	1843	5	9	0	<-3	1	1	Mutual exclusivity
GATA2	ZRSR2	1794	51	12	0	<-3	1	1	Mutual exclusivity
U2AF1_S34	BRAF	1816	32	9	0	<-3	1	1	Mutual exclusivity
STAG2	U2AF1_other	1783	69	5	0	<-3	1	1	Mutual exclusivity
TP53	U2AF1_R156_Q157	1746	100	11	0	<-3	1	1	Mutual exclusivity
CEBPA	BRAF	1716	132	9	0	<-3	1	1	Mutual exclusivity
SRSF2	U2AF1_R156_Q157	1725	121	11	0	<-3	1	1	Mutual exclusivity
CBL	ZRSR2	1810	35	12	0	<-3	1	1	Mutual exclusivity
KIT	BRAF	1768	80	9	0	<-3	1	1	Mutual exclusivity
TET2	U2AF2	1675	179	3	0	<-3	1	1	Mutual exclusivity
TET2	GNAS	1675	179	3	0	<-3	1	1	Mutual exclusivity
KIT	JAK2	1764	80	13	0	<-3	1	1	Mutual exclusivity
SF3B1	U2AF2	1814	40	3	0	<-3	1	1	Mutual exclusivity
SF3B1	GNAS	1814	40	3	0	<-3	1	1	Mutual exclusivity
WT1	JAK2	1733	111	13	0	<-3	1	1	Mutual exclusivity
U2AF1_S34	U2AF1_both	1823	32	2	0	<-3	1	1	Mutual exclusivity
IDH2	U2AF1_both	1660	195	2	0	<-3	1	1	Mutual exclusivity
CEBPA	U2AF1_R156_Q157	1714	132	11	0	<-3	1	1	Mutual exclusivity
U2AF2	GNAS	1851	3	3	0	<-3	1	1	Mutual exclusivity
U2AF1_S34	GNAS	1822	32	3	0	<-3	1	1	Mutual exclusivity
WT1	U2AF1_R156_Q157	1735	111	11	0	<-3	1	1	Mutual exclusivity
CBL	U2AF1_both	1820	35	2	0	<-3	1	1	Mutual exclusivity
NF1	U2AF1_both	1820	35	2	0	<-3	1	1	Mutual exclusivity
ASXL1	SF3B1	1741	76	39	1	-0.768	1	1	Mutual exclusivity
IDH2	EZH2	1624	191	38	4	-0.16	1	1	Mutual exclusivity
PHF6	U2AF1_other	1808	44	5	0	<-3	1	1	Mutual exclusivity
U2AF1_other	U2AF1_both	1850	5	2	0	<-3	1	1	Mutual exclusivity
KIT	U2AF1_both	1775	80	2	0	<-3	1	1	Mutual exclusivity
PTPN11	ZRSR2	1718	127	12	0	<-3	1	1	Mutual exclusivity
TET2	U2AF1_both	1676	179	2	0	<-3	1	1	Mutual exclusivity
U2AF1_R156_Q157	U2AF1_other	1841	11	5	0	<-3	1	1	Mutual exclusivity
CBL	JAK2	1809	35	13	0	<-3	1	1	Mutual exclusivity
NF1	JAK2	1809	35	13	0	<-3	1	1	Mutual exclusivity
FLT3	U2AF1_both	1245	610	2	0	<-3	1	1	Mutual exclusivity
IDH1	BRAF	1710	138	9	0	<-3	1	1	Mutual exclusivity
IDH2	U2AF2	1659	195	3	0	<-3	1	1	Mutual exclusivity
TP53	SF3B1	1719	98	38	2	-0.115	1	1	Mutual exclusivity
U2AF2	U2AF1_both	1852	3	2	0	<-3	1	1	Mutual exclusivity
GNAS	U2AF1_both	1852	3	2	0	<-3	1	1	Mutual exclusivity
WT1	U2AF1_both	1744	111	2	0	<-3	1	1	Mutual exclusivity
BCOR	U2AF1_R156_Q157	1798	48	11	0	<-3	1	1	Mutual exclusivity
NPM1	U2AF1_both	1306	549	2	0	<-3	1	1	Mutual exclusivity
PHF6	BRAF	1804	44	9	0	<-3	1	1	Mutual exclusivity
CBL	KIT	1743	34	79	1	-0.624	1	1	Mutual exclusivity
NRAS	BRAF	1559	289	8	1	-0.569	1	1	Mutual exclusivity
ASXL1	GATA2	1731	75	49	2	-0.086	1	1	Mutual exclusivity
U2AF1_S34	SF3B1	1785	32	40	0	<-3	1	1	Mutual exclusivity
U2AF1_R156_Q157	U2AF1_both	1844	11	2	0	<-3	1	1	Mutual exclusivity
STAG2	NF1	1754	68	34	1	-0.398	1	1	Mutual exclusivity
ETV6	ZRSR2	1821	24	12	0	<-3	1	1	Mutual exclusivity
JAK2	U2AF1_other	1839	13	5	0	<-3	1	1	Mutual exclusivity
CBL	GATA2	1772	34	50	1	0.06	1	1	Co-occurrence
TP53	U2AF1_other	1752	100	5	0	<-3	1	1	Mutual exclusivity
KIT	GATA2	1728	78	49	2	-0.145	1	1	Mutual exclusivity
STAG2	JAK2	1775	69	13	0	<-3	1	1	Mutual exclusivity
TET2	U2AF1_other	1673	179	5	0	<-3	1	1	Mutual exclusivity
EZH2	U2AF2	1812	42	3	0	<-3	1	1	Mutual exclusivity
EZH2	GNAS	1812	42	3	0	<-3	1	1	Mutual exclusivity
BCOR	BRAF	1800	48	9	0	<-3	1	1	Mutual exclusivity
BCOR	U2AF2	1806	48	3	0	<-3	1	1	Mutual exclusivity
U2AF2	U2AF1_other	1849	3	5	0	<-3	1	1	Mutual exclusivity
BCOR	GNAS	1806	48	3	0	<-3	1	1	Mutual exclusivity
U2AF1_other	GNAS	1849	5	3	0	<-3	1	1	Mutual exclusivity
ZRSR2	GNAS	1842	12	3	0	<-3	1	1	Mutual exclusivity
IDH1	U2AF2	1716	138	3	0	<-3	1	1	Mutual exclusivity
IDH1	GNAS	1716	138	3	0	<-3	1	1	Mutual exclusivity
CBL	ETV6	1798	35	24	0	<-3	1	1	Mutual exclusivity
U2AF2	BRAF	1845	3	9	0	<-3	1	1	Mutual exclusivity
STAG2	U2AF1_both	1786	69	2	0	<-3	1	1	Mutual exclusivity
EZH2	U2AF1_other	1810	42	5	0	<-3	1	1	Mutual exclusivity
TP53	U2AF2	1754	100	3	0	<-3	1	1	Mutual exclusivity
TP53	GNAS	1754	100	3	0	<-3	1	1	Mutual exclusivity
U2AF1_R156_Q157	U2AF2	1843	11	3	0	<-3	1	1	Mutual exclusivity
U2AF1_R156_Q157	GNAS	1843	11	3	0	<-3	1	1	Mutual exclusivity
CEBPA	GNAS	1722	132	3	0	<-3	1	1	Mutual exclusivity
U2AF1_S34	GATA2	1774	32	51	0	<-3	1	1	Mutual exclusivity
SRSF2	U2AF2	1733	121	3	0	<-3	1	1	Mutual exclusivity
WT1	U2AF2	1743	111	3	0	<-3	1	1	Mutual exclusivity
WT1	GNAS	1743	111	3	0	<-3	1	1	Mutual exclusivity
TP53	ETV6	1734	99	23	1	-0.393	1	1	Mutual exclusivity
ETV6	U2AF1_other	1828	24	5	0	<-3	1	1	Mutual exclusivity
PHF6	JAK2	1800	44	13	0	<-3	1	1	Mutual exclusivity
CEBPA	U2AF1_other	1720	132	5	0	<-3	1	1	Mutual exclusivity
GATA2	EZH2	1765	50	41	1	-0.216	1	1	Mutual exclusivity
PHF6	U2AF2	1810	44	3	0	<-3	1	1	Mutual exclusivity
PHF6	GNAS	1810	44	3	0	<-3	1	1	Mutual exclusivity
BCOR	U2AF1_other	1804	48	5	0	<-3	1	1	Mutual exclusivity
IDH1	U2AF1_other	1714	138	5	0	<-3	1	1	Mutual exclusivity
IDH1	EZH2	1680	135	39	3	-0.063	1	1	Mutual exclusivity
U2AF1_S34	U2AF1_other	1820	32	5	0	<-3	1	1	Mutual exclusivity
BCOR	JAK2	1796	48	13	0	<-3	1	1	Mutual exclusivity
DNMT3A	GNAS	1394	460	3	0	<-3	1	1	Mutual exclusivity
BCOR	SF3B1	1770	47	39	1	-0.05	1	1	Mutual exclusivity
BCOR	ETV6	1785	48	24	0	<-3	1	1	Mutual exclusivity
CEBPA	STAG2	1661	127	64	5	0.031	1	1	Co-occurrence
U2AF2	JAK2	1841	3	13	0	<-3	1	1	Mutual exclusivity
JAK2	GNAS	1841	13	3	0	<-3	1	1	Mutual exclusivity
CBL	BCOR	1774	35	48	0	<-3	1	1	Mutual exclusivity
KRAS	GNAS	1767	87	3	0	<-3	1	1	Mutual exclusivity
STAG2	SF3B1	1749	68	39	1	-0.601	1	1	Mutual exclusivity
TP53	BCOR	1711	98	46	2	-0.398	1	1	Mutual exclusivity
PTPN11	U2AF1_other	1725	127	5	0	<-3	1	1	Mutual exclusivity
GATA2	U2AF2	1803	51	3	0	<-3	1	1	Mutual exclusivity
GATA2	GNAS	1803	51	3	0	<-3	1	1	Mutual exclusivity
NRAS	U2AF1_S34	1540	285	27	5	0.001	1	1	Co-occurrence
ASXL1	U2AF2	1777	77	3	0	<-3	1	1	Mutual exclusivity
PTPN11	CBL	1697	125	33	2	-0.281	1	1	Mutual exclusivity
ASXL1	KIT	1703	74	77	3	-0.157	1	1	Mutual exclusivity
NRAS	U2AF2	1564	290	3	0	<-3	1	1	Mutual exclusivity
PTPN11	JAK2	1717	127	13	0	<-3	1	1	Mutual exclusivity
NRAS	U2AF1_other	1562	290	5	0	<-3	1	1	Mutual exclusivity
CEBPA	ETV6	1702	131	23	1	-0.824	1	1	Mutual exclusivity
CBL	U2AF1_other	1817	35	5	0	<-3	1	1	Mutual exclusivity
NF1	U2AF1_other	1817	35	5	0	<-3	1	1	Mutual exclusivity
PTPN11	U2AF2	1727	127	3	0	<-3	1	1	Mutual exclusivity
PTPN11	GNAS	1727	127	3	0	<-3	1	1	Mutual exclusivity
ETV6	JAK2	1820	24	13	0	<-3	1	1	Mutual exclusivity
U2AF1_S34	KIT	1746	31	79	1	-0.488	1	1	Mutual exclusivity
PTPN11	U2AF1_R156_Q157	1719	127	11	0	<-3	1	1	Mutual exclusivity
PTPN11	SF3B1	1692	125	38	2	-0.489	1	1	Mutual exclusivity
GATA2	JAK2	1793	51	13	0	<-3	1	1	Mutual exclusivity
WT1	ETV6	1723	110	23	1	-0.554	1	1	Mutual exclusivity
RUNX1	U2AF2	1703	151	3	0	<-3	1	1	Mutual exclusivity
BRAF	GNAS	1845	9	3	0	<-3	1	1	Mutual exclusivity
WT1	KIT	1670	107	76	4	-0.284	1	1	Mutual exclusivity
STAG2	ETV6	1764	69	24	0	<-3	1	1	Mutual exclusivity
CBL	U2AF2	1819	35	3	0	<-3	1	1	Mutual exclusivity
NF1	U2AF2	1819	35	3	0	<-3	1	1	Mutual exclusivity
CBL	GNAS	1819	35	3	0	<-3	1	1	Mutual exclusivity
NF1	GNAS	1819	35	3	0	<-3	1	1	Mutual exclusivity
KIT	U2AF2	1774	80	3	0	<-3	1	1	Mutual exclusivity
KIT	GNAS	1774	80	3	0	<-3	1	1	Mutual exclusivity
PTPN11	ETV6	1707	126	23	1	-0.764	1	1	Mutual exclusivity
ASXL1	U2AF1_S34	1749	76	31	1	-0.43	1	1	Mutual exclusivity
IDH1	ETV6	1696	137	23	1	-0.894	1	1	Mutual exclusivity
ETV6	U2AF2	1830	24	3	0	<-3	1	1	Mutual exclusivity
ETV6	GNAS	1830	24	3	0	<-3	1	1	Mutual exclusivity
STAG2	U2AF1_S34	1757	68	31	1	-0.263	1	1	Mutual exclusivity
STAG2	WT1	1681	65	107	4	-0.049	1	1	Mutual exclusivity

## Sheet: sAML
A	B	Neither	A Not B	B Not A	Both	Log2 Odds Ratio	p-Value	q-Value	Tendency
IDH2	SRSF2	353	24	53	28	2.958	<0.001	<0.001	Co-occurrence
STAG2	SRSF2	359	18	59	22	2.895	<0.001	<0.001	Co-occurrence
ASXL1	RUNX1	329	51	47	31	2.089	<0.001	<0.001	Co-occurrence
TP53	RUNX1	299	81	77	1	<-3	<0.001	<0.001	Mutual exclusivity
TET2	CEBPA	395	52	3	8	>3	<0.001	<0.001	Co-occurrence
EZH2	TET2	379	19	46	14	2.602	<0.001	0.001	Co-occurrence
NPM1	WT1	425	19	8	6	>3	<0.001	0.002	Co-occurrence
TP53	ASXL1	297	79	79	3	-2.808	<0.001	0.003	Mutual exclusivity
DNMT3A	NPM1	385	48	14	11	2.656	<0.001	0.004	Co-occurrence
RUNX1	PHF6	373	68	7	10	2.97	<0.001	0.004	Co-occurrence
ASXL1	SRSF2	322	55	54	27	1.55	<0.001	0.009	Co-occurrence
BCOR	STAG2	399	19	31	9	2.608	<0.001	0.01	Co-occurrence
BCOR	DNMT3A	382	17	48	11	2.364	<0.001	0.01	Co-occurrence
TP53	SRSF2	299	78	77	4	-2.328	<0.001	0.014	Mutual exclusivity
TP53	IDH2	325	81	51	1	<-3	<0.001	0.014	Mutual exclusivity
EZH2	CEBPA	419	28	6	5	>3	<0.001	0.016	Co-occurrence
EZH2	ASXL1	357	19	68	14	1.952	<0.001	0.016	Co-occurrence
RUNX1	SRSF2	324	53	56	25	1.448	<0.001	0.016	Co-occurrence
BCOR	RUNX1	364	16	66	12	2.048	<0.001	0.022	Co-occurrence
TET2	ASXL1	337	39	61	21	1.573	<0.001	0.023	Co-occurrence
BCOR	U2AF1_S34	408	21	22	7	2.628	<0.001	0.023	Co-occurrence
SRSF2	IDH1	358	68	19	13	1.849	0.001	0.031	Co-occurrence
EZH2	ZRSR2	416	28	9	5	>3	0.002	0.041	Co-occurrence
STAG2	ASXL1	351	25	67	15	1.652	0.002	0.042	Co-occurrence
STAG2	TET2	370	28	48	12	1.724	0.003	0.054	Co-occurrence
RUNX1	FLT3	355	64	25	14	1.635	0.003	0.057	Co-occurrence
TP53	IDH1	344	82	32	0	<-3	0.003	0.057	Mutual exclusivity
DNMT3A	IDH2	361	45	38	14	1.563	0.003	0.062	Co-occurrence
TP53	TET2	319	79	57	3	-2.234	0.003	0.062	Mutual exclusivity
STAG2	TP53	337	39	81	1	<-3	0.004	0.077	Mutual exclusivity
U2AF1_S34	TP53	347	29	82	0	<-3	0.005	0.077	Mutual exclusivity
ASXL1	PHF6	367	74	9	8	2.14	0.005	0.077	Co-occurrence
TP53	SF3B1	346	82	30	0	<-3	0.005	0.078	Mutual exclusivity
TET2	SRSF2	336	41	62	19	1.328	0.006	0.087	Co-occurrence
EZH2	RUNX1	359	21	66	12	1.636	0.006	0.092	Co-occurrence
PTPN11	TET2	382	16	52	8	1.877	0.007	0.107	Co-occurrence
STAG2	IDH2	376	30	42	10	1.577	0.009	0.123	Co-occurrence
SF3B1	FLT3	396	23	32	7	1.913	0.009	0.123	Co-occurrence
RUNX1	NPM1	355	78	25	0	<-3	0.013	0.163	Mutual exclusivity
ASXL1	NPM1	351	82	25	0	<-3	0.013	0.163	Mutual exclusivity
RUNX1	IDH1	359	67	21	11	1.489	0.013	0.163	Co-occurrence
STAG2	RUNX1	353	27	65	13	1.387	0.013	0.166	Co-occurrence
U2AF1_S34	KRAS	417	25	12	4	2.475	0.014	0.171	Co-occurrence
TET2	PHF6	387	54	11	6	1.967	0.015	0.183	Co-occurrence
STAG2	EZH2	392	33	26	7	1.677	0.018	0.206	Co-occurrence
BCOR	SRSF2	359	18	71	10	1.49	0.018	0.209	Co-occurrence
RUNX1	ZRSR2	372	72	8	6	1.954	0.019	0.217	Co-occurrence
ETV6	BRAF	447	10	0	1	>3	0.024	0.262	Co-occurrence
BCOR	ETV6	422	25	8	3	2.662	0.024	0.262	Co-occurrence
TP53	FLT3	339	80	37	2	-2.126	0.028	0.294	Mutual exclusivity
SRSF2	FLT3	340	79	37	2	-2.104	0.028	0.294	Mutual exclusivity
JAK2	ZRSR2	436	8	12	2	>3	0.034	0.336	Co-occurrence
SRSF2	U2AF1_R156_Q157	356	81	21	0	<-3	0.034	0.336	Mutual exclusivity
PTPN11	NPM1	413	20	21	4	1.976	0.035	0.336	Co-occurrence
IDH2	ASXL1	339	37	67	15	1.036	0.035	0.336	Co-occurrence
IDH2	IDH1	374	52	32	0	<-3	0.038	0.356	Mutual exclusivity
NRAS	WT1	382	62	9	5	1.775	0.04	0.37	Co-occurrence
U2AF1_S34	SRSF2	349	28	80	1	-2.682	0.042	0.378	Mutual exclusivity
TET2	U2AF1_R156_Q157	383	54	15	6	1.504	0.044	0.391	Co-occurrence
DNMT3A	ASXL1	322	54	77	5	-1.369	0.045	0.394	Mutual exclusivity
PTPN11	RUNX1	364	16	70	8	1.379	0.046	0.394	Co-occurrence
GATA2	SF3B1	418	10	27	3	2.216	0.046	0.396	Co-occurrence
STAG2	PTPN11	399	35	19	5	1.585	0.048	0.404	Co-occurrence
DNMT3A	IDH1	375	51	24	8	1.293	0.05	0.411	Co-occurrence
EZH2	FLT3	392	27	33	6	1.4	0.051	0.411	Co-occurrence
U2AF1_S34	CBL	418	26	11	3	2.132	0.052	0.412	Co-occurrence
SRSF2	NF1	360	81	17	0	<-3	0.052	0.412	Mutual exclusivity
PTPN11	ASXL1	360	16	74	8	1.282	0.055	0.423	Co-occurrence
EZH2	U2AF1_R156_Q157	408	29	17	4	1.727	0.056	0.427	Co-occurrence
EZH2	GATA2	415	30	10	3	2.053	0.059	0.448	Co-occurrence
BCOR	BRAF	430	27	0	1	>3	0.061	0.45	Co-occurrence
NRAS	STAG2	361	57	30	10	1.078	0.061	0.45	Co-occurrence
TP53	NPM1	352	81	24	1	-2.465	0.064	0.456	Mutual exclusivity
GATA2	ASXL1	368	8	77	5	1.579	0.064	0.456	Co-occurrence
BCOR	KRAS	417	25	13	3	1.945	0.067	0.472	Co-occurrence
IDH1	U2AF1_other	426	31	0	1	>3	0.07	0.485	Co-occurrence
TET2	KIT	393	57	5	3	2.049	0.074	0.505	Co-occurrence
DNMT3A	FLT3	369	50	30	9	1.147	0.075	0.505	Co-occurrence
ASXL1	U2AF1_R156_Q157	362	75	14	7	1.271	0.077	0.505	Co-occurrence
GATA2	TET2	389	9	56	4	1.626	0.077	0.505	Co-occurrence
TP53	WT1	362	82	14	0	<-3	0.085	0.554	Mutual exclusivity
NRAS	ASXL1	326	50	65	17	0.77	0.087	0.562	Co-occurrence
DNMT3A	SF3B1	376	52	23	7	1.138	0.089	0.569	Co-occurrence
SF3B1	NF1	414	27	14	3	1.716	0.092	0.581	Co-occurrence
EZH2	SRSF2	346	31	79	2	-1.823	0.094	0.583	Mutual exclusivity
TP53	EZH2	345	80	31	2	-1.846	0.095	0.583	Mutual exclusivity
DNMT3A	TET2	351	47	48	12	0.901	0.096	0.583	Co-occurrence
ETV6	RUNX1	373	7	74	4	1.526	0.099	0.596	Co-occurrence
NRAS	GATA2	382	63	9	4	1.43	0.107	0.609	Co-occurrence
EZH2	KIT	419	31	6	2	2.172	0.107	0.609	Co-occurrence
IDH2	FLT3	368	51	38	1	-2.397	0.107	0.609	Mutual exclusivity
WT1	FLT3	408	11	36	3	1.628	0.108	0.609	Co-occurrence
FLT3	ZRSR2	408	36	11	3	1.628	0.108	0.609	Co-occurrence
PTPN11	CEBPA	425	22	9	2	2.102	0.108	0.609	Co-occurrence
BCOR	IDH2	384	22	46	6	1.187	0.115	0.632	Co-occurrence
IDH2	PHF6	393	48	13	4	1.333	0.115	0.632	Co-occurrence
CEBPA	NPM1	424	9	23	2	2.034	0.116	0.633	Co-occurrence
NRAS	TP53	316	60	75	7	-1.025	0.119	0.641	Mutual exclusivity
IDH2	TET2	349	49	57	3	-1.416	0.125	0.667	Mutual exclusivity
TET2	U2AF1_other	398	59	0	1	>3	0.131	0.692	Co-occurrence
NRAS	ZRSR2	381	63	10	4	1.274	0.134	0.699	Co-occurrence
SF3B1	SRSF2	349	28	79	2	-1.664	0.136	0.705	Mutual exclusivity
TP53	GATA2	363	82	13	0	<-3	0.138	0.708	Mutual exclusivity
KIT	RUNX1	375	5	75	3	1.585	0.14	0.711	Co-occurrence
NRAS	PTPN11	373	61	18	6	1.027	0.142	0.713	Co-occurrence
PTPN11	GATA2	423	22	11	2	1.806	0.144	0.713	Co-occurrence
SRSF2	WT1	363	81	14	0	<-3	0.145	0.713	Mutual exclusivity
ASXL1	ZRSR2	367	77	9	5	1.405	0.146	0.713	Co-occurrence
ASXL1	IDH1	353	73	23	9	0.92	0.148	0.713	Co-occurrence
U2AF1_S34	ETV6	420	27	9	2	1.789	0.149	0.713	Co-occurrence
IDH1	JAK2	418	30	8	2	1.8	0.15	0.713	Co-occurrence
GATA2	NPM1	422	11	23	2	1.738	0.154	0.728	Co-occurrence
STAG2	KRAS	405	37	13	3	1.337	0.156	0.728	Co-occurrence
KIT	JAK2	441	7	9	1	2.807	0.163	0.736	Co-occurrence
PTPN11	WT1	422	22	12	2	1.677	0.163	0.736	Co-occurrence
PTPN11	CBL	422	22	12	2	1.677	0.163	0.736	Co-occurrence
PTPN11	ZRSR2	422	22	12	2	1.677	0.163	0.736	Co-occurrence
NRAS	U2AF1_S34	369	60	22	7	0.969	0.169	0.749	Co-occurrence
RUNX1	U2AF1_other	380	77	0	1	>3	0.17	0.749	Co-occurrence
RUNX1	GNAS	380	77	0	1	>3	0.17	0.749	Co-occurrence
SRSF2	BRAF	377	80	0	1	>3	0.177	0.765	Co-occurrence
SRSF2	U2AF1_other	377	80	0	1	>3	0.177	0.765	Co-occurrence
ASXL1	KRAS	365	77	11	5	1.107	0.18	0.766	Co-occurrence
U2AF1_R156_Q157	PHF6	422	19	15	2	1.566	0.18	0.766	Co-occurrence
ETV6	EZH2	416	9	31	2	1.576	0.184	0.778	Co-occurrence
TET2	RUNX1	334	46	64	14	0.667	0.196	0.819	Co-occurrence
BCOR	TP53	350	26	80	2	-1.571	0.199	0.829	Mutual exclusivity
ASXL1	NF1	364	77	12	5	0.978	0.204	0.84	Co-occurrence
NRAS	CEBPA	383	64	8	3	1.166	0.208	0.852	Co-occurrence
DNMT3A	PTPN11	380	54	19	5	0.889	0.217	0.88	Co-occurrence
SRSF2	JAK2	367	81	10	0	<-3	0.221	0.88	Mutual exclusivity
KIT	CBL	437	7	13	1	2.264	0.221	0.88	Co-occurrence
PTPN11	PHF6	419	22	15	2	1.344	0.222	0.88	Co-occurrence
TP53	ETV6	365	82	11	0	<-3	0.227	0.886	Mutual exclusivity
U2AF1_S34	IDH2	378	28	51	1	-1.918	0.231	0.886	Mutual exclusivity
IDH2	SF3B1	377	51	29	1	-1.972	0.232	0.886	Mutual exclusivity
DNMT3A	ZRSR2	385	59	14	0	<-3	0.233	0.886	Mutual exclusivity
STAG2	FLT3	380	39	38	1	-1.963	0.234	0.886	Mutual exclusivity
IDH2	KRAS	390	52	16	0	<-3	0.236	0.886	Mutual exclusivity
CEBPA	FLT3	410	9	37	2	1.3	0.239	0.886	Co-occurrence
U2AF1_R156_Q157	FLT3	398	21	39	0	<-3	0.241	0.886	Mutual exclusivity
EZH2	NPM1	400	33	25	0	<-3	0.242	0.886	Mutual exclusivity
U2AF1_S34	SF3B1	399	29	30	0	<-3	0.244	0.886	Mutual exclusivity
DNMT3A	U2AF1_S34	376	53	23	6	0.888	0.245	0.886	Co-occurrence
BCOR	EZH2	397	28	33	0	<-3	0.248	0.886	Mutual exclusivity
STAG2	CEBPA	409	38	9	2	1.258	0.248	0.886	Co-occurrence
U2AF1_S34	TET2	375	23	54	6	0.857	0.249	0.886	Co-occurrence
KIT	KRAS	435	7	15	1	2.051	0.249	0.886	Co-occurrence
GATA2	RUNX1	371	9	74	4	1.156	0.25	0.886	Co-occurrence
GATA2	JAK2	436	12	9	1	2.013	0.252	0.888	Co-occurrence
IDH1	WT1	414	30	12	2	1.202	0.255	0.892	Co-occurrence
EZH2	CBL	413	31	12	2	1.151	0.267	0.927	Co-occurrence
GATA2	CEBPA	435	12	10	1	1.858	0.274	0.938	Co-occurrence
BCOR	NRAS	369	22	61	6	0.722	0.276	0.938	Co-occurrence
BCOR	NF1	415	26	15	2	1.09	0.279	0.938	Co-occurrence
PTPN11	SRSF2	355	22	79	2	-1.292	0.281	0.938	Mutual exclusivity
SRSF2	NPM1	354	79	23	2	-1.36	0.281	0.938	Mutual exclusivity
SF3B1	KRAS	414	28	14	2	1.079	0.282	0.938	Co-occurrence
BCOR	FLT3	395	24	35	4	0.911	0.284	0.938	Co-occurrence
SRSF2	CBL	367	77	10	4	0.931	0.285	0.938	Co-occurrence
DNMT3A	EZH2	368	57	31	2	-1.264	0.289	0.938	Mutual exclusivity
ASXL1	CBL	366	78	10	4	0.908	0.29	0.938	Co-occurrence
ETV6	WT1	434	10	13	1	1.739	0.292	0.938	Co-occurrence
CEBPA	WT1	434	10	13	1	1.739	0.292	0.938	Co-occurrence
U2AF1_S34	PHF6	414	27	15	2	1.032	0.293	0.938	Co-occurrence
STAG2	GATA2	407	38	11	2	0.962	0.316	1	Co-occurrence
JAK2	PHF6	432	9	16	1	1.585	0.318	1	Co-occurrence
SF3B1	RUNX1	357	23	71	7	0.614	0.321	1	Co-occurrence
TP53	KRAS	361	81	15	1	-1.751	0.326	1	Mutual exclusivity
TP53	PHF6	360	81	16	1	-1.848	0.33	1	Mutual exclusivity
GATA2	WT1	432	12	13	1	1.469	0.336	1	Co-occurrence
GATA2	CBL	432	12	13	1	1.469	0.336	1	Co-occurrence
ETV6	NF1	431	10	16	1	1.43	0.343	1	Co-occurrence
STAG2	ZRSR2	406	38	12	2	0.832	0.35	1	Co-occurrence
NRAS	JAK2	381	67	10	0	<-3	0.37	1	Mutual exclusivity
TET2	JAK2	388	60	10	0	<-3	0.373	1	Mutual exclusivity
DNMT3A	ETV6	388	59	11	0	<-3	0.373	1	Mutual exclusivity
DNMT3A	JAK2	389	59	10	0	<-3	0.374	1	Mutual exclusivity
GATA2	KRAS	430	12	15	1	1.256	0.374	1	Co-occurrence
U2AF1_R156_Q157	JAK2	428	20	9	1	1.25	0.378	1	Co-occurrence
IDH2	GATA2	393	52	13	0	<-3	0.378	1	Mutual exclusivity
NRAS	RUNX1	327	53	64	14	0.433	0.38	1	Co-occurrence
FLT3	KRAS	403	39	16	0	<-3	0.382	1	Mutual exclusivity
NF1	FLT3	402	17	39	0	<-3	0.383	1	Mutual exclusivity
STAG2	NF1	401	40	17	0	<-3	0.384	1	Mutual exclusivity
IDH2	WT1	392	52	14	0	<-3	0.385	1	Mutual exclusivity
IDH1	U2AF1_R156_Q157	405	32	21	0	<-3	0.385	1	Mutual exclusivity
U2AF1_S34	U2AF1_R156_Q157	408	29	21	0	<-3	0.386	1	Mutual exclusivity
U2AF1_S34	NPM1	404	29	25	0	<-3	0.391	1	Mutual exclusivity
GATA2	NF1	429	12	16	1	1.16	0.393	1	Co-occurrence
TP53	JAK2	369	79	7	3	1.001	0.395	1	Co-occurrence
KRAS	ZRSR2	429	15	13	1	1.138	0.397	1	Co-occurrence
BCOR	KIT	423	27	7	1	1.162	0.399	1	Co-occurrence
NRAS	IDH2	344	62	47	5	-0.761	0.403	1	Mutual exclusivity
PTPN11	EZH2	404	21	30	3	0.944	0.403	1	Co-occurrence
DNMT3A	WT1	388	56	11	3	0.918	0.405	1	Co-occurrence
ETV6	U2AF1_R156_Q157	427	10	20	1	1.094	0.407	1	Co-occurrence
CEBPA	U2AF1_R156_Q157	427	10	20	1	1.094	0.407	1	Co-occurrence
TET2	CBL	387	57	11	3	0.889	0.409	1	Co-occurrence
TET2	ZRSR2	387	57	11	3	0.889	0.409	1	Co-occurrence
U2AF1_S34	KIT	422	28	7	1	1.106	0.41	1	Co-occurrence
NRAS	SF3B1	367	61	24	6	0.589	0.42	1	Co-occurrence
NRAS	TET2	342	56	49	11	0.455	0.432	1	Co-occurrence
IDH2	RUNX1	339	41	67	11	0.441	0.433	1	Co-occurrence
KIT	IDH1	419	7	31	1	0.949	0.442	1	Co-occurrence
PTPN11	FLT3	398	21	36	3	0.659	0.447	1	Co-occurrence
NF1	KRAS	426	16	15	1	0.828	0.46	1	Co-occurrence
NPM1	FLT3	397	22	36	3	0.589	0.461	1	Co-occurrence
DNMT3A	TP53	325	51	74	8	-0.538	0.467	1	Mutual exclusivity
BCOR	JAK2	421	27	9	1	0.793	0.471	1	Co-occurrence
ASXL1	WT1	363	81	13	1	-1.536	0.481	1	Mutual exclusivity
TP53	ZRSR2	363	81	13	1	-1.536	0.481	1	Mutual exclusivity
RUNX1	WT1	367	77	13	1	-1.448	0.481	1	Mutual exclusivity
NRAS	FLT3	359	60	32	7	0.388	0.485	1	Co-occurrence
U2AF1_R156_Q157	CBL	424	20	13	1	0.706	0.487	1	Co-occurrence
NRAS	NF1	375	66	16	1	-1.494	0.488	1	Mutual exclusivity
NRAS	PHF6	375	66	16	1	-1.494	0.488	1	Mutual exclusivity
SF3B1	JAK2	419	29	9	1	0.683	0.496	1	Co-occurrence
IDH2	PTPN11	383	51	23	1	-1.615	0.503	1	Mutual exclusivity
U2AF1_S34	CEBPA	419	28	10	1	0.582	0.517	1	Co-occurrence
STAG2	KIT	411	39	7	1	0.59	0.521	1	Co-occurrence
NRAS	U2AF1_R156_Q157	374	63	17	4	0.482	0.529	1	Co-occurrence
ETV6	SF3B1	418	10	29	1	0.527	0.529	1	Co-occurrence
RUNX1	U2AF1_R156_Q157	361	76	19	2	-1	0.552	1	Mutual exclusivity
IDH1	CEBPA	416	31	10	1	0.424	0.553	1	Co-occurrence
TET2	NPM1	377	56	21	4	0.359	0.554	1	Co-occurrence
TP53	U2AF1_R156_Q157	360	77	16	5	0.547	0.557	1	Co-occurrence
IDH2	EZH2	375	50	31	2	-1.047	0.565	1	Mutual exclusivity
PTPN11	KRAS	419	23	15	1	0.28	0.584	1	Co-occurrence
NPM1	KRAS	418	24	15	1	0.216	0.599	1	Co-occurrence
IDH2	KIT	398	52	8	0	<-3	0.606	1	Mutual exclusivity
PTPN11	NF1	418	23	16	1	0.184	0.606	1	Co-occurrence
NRAS	EZH2	364	61	27	6	0.407	0.607	1	Co-occurrence
U2AF1_S34	RUNX1	357	23	72	6	0.371	0.609	1	Co-occurrence
STAG2	ETV6	407	40	11	0	<-3	0.61	1	Mutual exclusivity
NRAS	KIT	383	67	8	0	<-3	0.61	1	Mutual exclusivity
ETV6	FLT3	408	11	39	0	<-3	0.61	1	Mutual exclusivity
BCOR	ASXL1	354	22	76	6	0.345	0.612	1	Co-occurrence
GATA2	IDH1	413	13	32	0	<-3	0.613	1	Mutual exclusivity
SF3B1	ZRSR2	414	30	14	0	<-3	0.614	1	Mutual exclusivity
SF3B1	PHF6	411	30	17	0	<-3	0.617	1	Mutual exclusivity
NPM1	U2AF1_R156_Q157	412	25	21	0	<-3	0.619	1	Mutual exclusivity
FLT3	CBL	405	39	14	0	<-3	0.62	1	Mutual exclusivity
IDH1	NF1	409	32	17	0	<-3	0.621	1	Mutual exclusivity
IDH2	ETV6	395	52	11	0	<-3	0.622	1	Mutual exclusivity
IDH2	CEBPA	395	52	11	0	<-3	0.622	1	Mutual exclusivity
EZH2	NF1	408	33	17	0	<-3	0.624	1	Mutual exclusivity
BCOR	U2AF1_R156_Q157	409	28	21	0	<-3	0.63	1	Mutual exclusivity
KIT	SRSF2	371	6	79	2	0.647	0.636	1	Co-occurrence
DNMT3A	CEBPA	390	57	9	2	0.605	0.641	1	Co-occurrence
FLT3	PHF6	404	37	15	2	0.542	0.648	1	Co-occurrence
BCOR	PTPN11	408	26	22	2	0.513	0.651	1	Co-occurrence
U2AF1_S34	PTPN11	407	27	22	2	0.455	0.658	1	Co-occurrence
PTPN11	SF3B1	406	22	28	2	0.399	0.665	1	Co-occurrence
NRAS	ETV6	382	65	9	2	0.385	0.667	1	Co-occurrence
DNMT3A	GATA2	388	57	11	2	0.308	0.678	1	Co-occurrence
RUNX1	JAK2	372	76	8	2	0.291	0.682	1	Co-occurrence
IDH1	NPM1	403	30	23	2	0.224	0.691	1	Co-occurrence
TP53	CEBPA	366	81	10	1	-1.146	0.698	1	Mutual exclusivity
SRSF2	CEBPA	367	80	10	1	-1.124	0.698	1	Mutual exclusivity
ETV6	SRSF2	367	10	80	1	-1.124	0.698	1	Mutual exclusivity
RUNX1	CEBPA	370	77	10	1	-1.057	0.699	1	Mutual exclusivity
NRAS	CBL	378	66	13	1	-1.183	0.704	1	Mutual exclusivity
STAG2	U2AF1_R156_Q157	399	38	19	2	0.144	0.704	1	Co-occurrence
IDH2	NF1	390	51	16	1	-1.065	0.707	1	Mutual exclusivity
BCOR	IDH1	399	27	31	1	-1.069	0.71	1	Mutual exclusivity
U2AF1_S34	IDH1	398	28	31	1	-1.125	0.71	1	Mutual exclusivity
U2AF1_S34	EZH2	397	28	32	1	-1.174	0.711	1	Mutual exclusivity
SF3B1	IDH1	397	29	31	1	-1.179	0.711	1	Mutual exclusivity
STAG2	NPM1	394	39	24	1	-1.248	0.713	1	Mutual exclusivity
NRAS	KRAS	378	64	13	3	0.447	0.715	1	Co-occurrence
DNMT3A	SRSF2	327	50	72	9	-0.291	0.716	1	Mutual exclusivity
EZH2	IDH1	394	32	31	1	-1.332	0.719	1	Mutual exclusivity
RUNX1	KRAS	367	75	13	3	0.175	0.743	1	Co-occurrence
DNMT3A	U2AF1_R156_Q157	381	56	18	3	0.181	0.743	1	Co-occurrence
IDH1	FLT3	390	29	36	3	0.164	0.746	1	Co-occurrence
STAG2	IDH1	389	37	29	3	0.121	0.752	1	Co-occurrence
IDH2	NPM1	384	49	22	3	0.096	0.755	1	Co-occurrence
NRAS	NPM1	370	63	21	4	0.162	0.774	1	Co-occurrence
BCOR	TET2	374	24	56	4	0.155	0.775	1	Co-occurrence
TET2	IDH1	369	57	29	3	-0.578	0.785	1	Mutual exclusivity
NRAS	IDH1	364	62	27	5	0.121	0.798	1	Co-occurrence
U2AF1_S34	ASXL1	351	25	78	4	-0.474	0.802	1	Mutual exclusivity
ASXL1	FLT3	343	76	33	6	-0.285	0.828	1	Mutual exclusivity
DNMT3A	NRAS	341	50	58	9	0.082	0.845	1	Co-occurrence
DNMT3A	RUNX1	330	50	69	9	-0.216	0.853	1	Mutual exclusivity
NRAS	SRSF2	321	56	70	11	-0.151	0.864	1	Mutual exclusivity
NF1	PHF6	424	17	17	0	<-3	1	1	Mutual exclusivity
IDH1	PHF6	410	31	16	1	-0.275	1	1	Mutual exclusivity
U2AF1_R156_Q157	NF1	420	21	17	0	<-3	1	1	Mutual exclusivity
PTPN11	IDH1	403	23	31	1	-0.823	1	1	Mutual exclusivity
SRSF2	PHF6	363	78	14	3	-0.004	1	1	Mutual exclusivity
TET2	FLT3	364	55	34	5	-0.039	1	1	Mutual exclusivity
STAG2	PHF6	402	39	16	1	-0.634	1	1	Mutual exclusivity
TET2	NF1	383	58	15	2	-0.184	1	1	Mutual exclusivity
BCOR	PHF6	414	27	16	1	-0.061	1	1	Mutual exclusivity
NPM1	CBL	419	25	14	0	<-3	1	1	Mutual exclusivity
NPM1	ZRSR2	419	25	14	0	<-3	1	1	Mutual exclusivity
NPM1	NF1	417	24	16	1	0.119	1	1	Co-occurrence
NPM1	PHF6	417	24	16	1	0.119	1	1	Co-occurrence
SRSF2	ZRSR2	365	79	12	2	-0.377	1	1	Mutual exclusivity
STAG2	U2AF1_S34	391	38	27	2	-0.392	1	1	Mutual exclusivity
PTPN11	U2AF1_R156_Q157	414	23	20	1	-0.152	1	1	Mutual exclusivity
JAK2	FLT3	409	10	39	0	<-3	1	1	Mutual exclusivity
SF3B1	NPM1	404	29	24	1	-0.785	1	1	Mutual exclusivity
U2AF1_R156_Q157	WT1	423	21	14	0	<-3	1	1	Mutual exclusivity
U2AF1_R156_Q157	ZRSR2	423	21	14	0	<-3	1	1	Mutual exclusivity
PTPN11	ETV6	423	24	11	0	<-3	1	1	Mutual exclusivity
SF3B1	U2AF1_R156_Q157	408	29	20	1	-0.507	1	1	Mutual exclusivity
U2AF2	FLT3	417	2	39	0	<-3	1	1	Mutual exclusivity
BCOR	NPM1	406	27	24	1	-0.675	1	1	Mutual exclusivity
U2AF2	NF1	439	2	17	0	<-3	1	1	Mutual exclusivity
U2AF2	PHF6	439	2	17	0	<-3	1	1	Mutual exclusivity
STAG2	BRAF	417	40	1	0	<-3	1	1	Mutual exclusivity
STAG2	U2AF1_other	417	40	1	0	<-3	1	1	Mutual exclusivity
STAG2	GNAS	417	40	1	0	<-3	1	1	Mutual exclusivity
SF3B1	ASXL1	351	25	77	5	-0.133	1	1	Mutual exclusivity
EZH2	PHF6	409	32	16	1	-0.324	1	1	Mutual exclusivity
KIT	FLT3	411	8	39	0	<-3	1	1	Mutual exclusivity
DNMT3A	NF1	384	57	15	2	-0.155	1	1	Mutual exclusivity
DNMT3A	PHF6	384	57	15	2	-0.155	1	1	Mutual exclusivity
GATA2	U2AF1_R156_Q157	424	13	21	0	<-3	1	1	Mutual exclusivity
BRAF	CEBPA	446	1	11	0	<-3	1	1	Mutual exclusivity
RUNX1	NF1	366	75	14	3	0.064	1	1	Co-occurrence
GATA2	PHF6	428	13	17	0	<-3	1	1	Mutual exclusivity
U2AF1_S34	NF1	413	28	16	1	-0.117	1	1	Mutual exclusivity
IDH1	CBL	413	31	13	1	0.035	1	1	Co-occurrence
IDH1	ZRSR2	413	31	13	1	0.035	1	1	Co-occurrence
WT1	NF1	427	14	17	0	<-3	1	1	Mutual exclusivity
NF1	CBL	427	17	14	0	<-3	1	1	Mutual exclusivity
WT1	PHF6	427	14	17	0	<-3	1	1	Mutual exclusivity
CBL	PHF6	427	14	17	0	<-3	1	1	Mutual exclusivity
NF1	ZRSR2	427	17	14	0	<-3	1	1	Mutual exclusivity
PHF6	ZRSR2	427	17	14	0	<-3	1	1	Mutual exclusivity
BCOR	CEBPA	419	28	11	0	<-3	1	1	Mutual exclusivity
BRAF	WT1	443	1	14	0	<-3	1	1	Mutual exclusivity
BRAF	CBL	443	1	14	0	<-3	1	1	Mutual exclusivity
BRAF	ZRSR2	443	1	14	0	<-3	1	1	Mutual exclusivity
GATA2	FLT3	407	12	38	1	-0.164	1	1	Mutual exclusivity
ETV6	CEBPA	436	11	11	0	<-3	1	1	Mutual exclusivity
BRAF	U2AF1_other	456	1	1	0	<-3	1	1	Mutual exclusivity
BRAF	GNAS	456	1	1	0	<-3	1	1	Mutual exclusivity
U2AF1_other	GNAS	456	1	1	0	<-3	1	1	Mutual exclusivity
BRAF	NF1	440	1	17	0	<-3	1	1	Mutual exclusivity
BRAF	PHF6	440	1	17	0	<-3	1	1	Mutual exclusivity
SRSF2	KRAS	364	78	13	3	0.107	1	1	Co-occurrence
PHF6	KRAS	425	17	16	0	<-3	1	1	Mutual exclusivity
SF3B1	WT1	415	29	13	1	0.139	1	1	Co-occurrence
SF3B1	CBL	415	29	13	1	0.139	1	1	Co-occurrence
ETV6	NPM1	422	11	25	0	<-3	1	1	Mutual exclusivity
BCOR	WT1	416	28	14	0	<-3	1	1	Mutual exclusivity
BCOR	CBL	416	28	14	0	<-3	1	1	Mutual exclusivity
BCOR	ZRSR2	416	28	14	0	<-3	1	1	Mutual exclusivity
KIT	NF1	433	8	17	0	<-3	1	1	Mutual exclusivity
KIT	PHF6	433	8	17	0	<-3	1	1	Mutual exclusivity
U2AF1_S34	FLT3	392	27	37	2	-0.35	1	1	Mutual exclusivity
U2AF2	CEBPA	445	2	11	0	<-3	1	1	Mutual exclusivity
GATA2	BRAF	444	13	1	0	<-3	1	1	Mutual exclusivity
GATA2	U2AF1_other	444	13	1	0	<-3	1	1	Mutual exclusivity
GATA2	GNAS	444	13	1	0	<-3	1	1	Mutual exclusivity
EZH2	BRAF	424	33	1	0	<-3	1	1	Mutual exclusivity
EZH2	U2AF1_other	424	33	1	0	<-3	1	1	Mutual exclusivity
EZH2	GNAS	424	33	1	0	<-3	1	1	Mutual exclusivity
BCOR	SF3B1	401	27	29	1	-0.965	1	1	Mutual exclusivity
GATA2	SRSF2	366	11	79	2	-0.248	1	1	Mutual exclusivity
STAG2	WT1	405	39	13	1	-0.324	1	1	Mutual exclusivity
STAG2	CBL	405	39	13	1	-0.324	1	1	Mutual exclusivity
ETV6	TET2	388	10	59	1	-0.605	1	1	Mutual exclusivity
TP53	BRAF	375	82	1	0	<-3	1	1	Mutual exclusivity
ASXL1	BRAF	375	82	1	0	<-3	1	1	Mutual exclusivity
TP53	U2AF1_other	375	82	1	0	<-3	1	1	Mutual exclusivity
ASXL1	U2AF1_other	375	82	1	0	<-3	1	1	Mutual exclusivity
TP53	GNAS	375	82	1	0	<-3	1	1	Mutual exclusivity
ASXL1	GNAS	375	82	1	0	<-3	1	1	Mutual exclusivity
ASXL1	CEBPA	367	80	9	2	0.028	1	1	Co-occurrence
KIT	CEBPA	439	8	11	0	<-3	1	1	Mutual exclusivity
BCOR	GATA2	417	28	13	0	<-3	1	1	Mutual exclusivity
TP53	NF1	362	79	14	3	-0.026	1	1	Mutual exclusivity
SF3B1	BRAF	427	30	1	0	<-3	1	1	Mutual exclusivity
SF3B1	U2AF1_other	427	30	1	0	<-3	1	1	Mutual exclusivity
SF3B1	GNAS	427	30	1	0	<-3	1	1	Mutual exclusivity
CEBPA	NF1	430	11	17	0	<-3	1	1	Mutual exclusivity
ETV6	PHF6	430	11	17	0	<-3	1	1	Mutual exclusivity
CEBPA	PHF6	430	11	17	0	<-3	1	1	Mutual exclusivity
NRAS	BRAF	390	67	1	0	<-3	1	1	Mutual exclusivity
NRAS	U2AF1_other	390	67	1	0	<-3	1	1	Mutual exclusivity
NRAS	GNAS	390	67	1	0	<-3	1	1	Mutual exclusivity
SF3B1	U2AF2	426	30	2	0	<-3	1	1	Mutual exclusivity
DNMT3A	STAG2	364	54	35	5	-0.054	1	1	Mutual exclusivity
SRSF2	GNAS	376	81	1	0	<-3	1	1	Mutual exclusivity
U2AF1_S34	GATA2	416	29	13	0	<-3	1	1	Mutual exclusivity
KIT	NPM1	425	8	25	0	<-3	1	1	Mutual exclusivity
SF3B1	CEBPA	417	30	11	0	<-3	1	1	Mutual exclusivity
TP53	PTPN11	356	78	20	4	-0.132	1	1	Mutual exclusivity
PTPN11	JAK2	424	24	10	0	<-3	1	1	Mutual exclusivity
NPM1	JAK2	423	25	10	0	<-3	1	1	Mutual exclusivity
SF3B1	TET2	372	26	56	4	0.031	1	1	Co-occurrence
TP53	CBL	364	80	12	2	-0.399	1	1	Mutual exclusivity
ETV6	CBL	433	11	14	0	<-3	1	1	Mutual exclusivity
CEBPA	CBL	433	11	14	0	<-3	1	1	Mutual exclusivity
ETV6	ZRSR2	433	11	14	0	<-3	1	1	Mutual exclusivity
CEBPA	ZRSR2	433	11	14	0	<-3	1	1	Mutual exclusivity
BRAF	KRAS	441	1	16	0	<-3	1	1	Mutual exclusivity
KRAS	U2AF1_other	441	16	1	0	<-3	1	1	Mutual exclusivity
KRAS	GNAS	441	16	1	0	<-3	1	1	Mutual exclusivity
EZH2	SF3B1	397	31	28	2	-0.129	1	1	Mutual exclusivity
U2AF1_S34	U2AF2	427	29	2	0	<-3	1	1	Mutual exclusivity
PTPN11	U2AF2	432	24	2	0	<-3	1	1	Mutual exclusivity
STAG2	SF3B1	390	38	28	2	-0.448	1	1	Mutual exclusivity
EZH2	WT1	412	32	13	1	-0.014	1	1	Mutual exclusivity
TET2	WT1	385	59	13	1	-0.994	1	1	Mutual exclusivity
BRAF	NPM1	432	1	25	0	<-3	1	1	Mutual exclusivity
NPM1	U2AF1_other	432	25	1	0	<-3	1	1	Mutual exclusivity
NPM1	GNAS	432	25	1	0	<-3	1	1	Mutual exclusivity
BCOR	U2AF1_other	429	28	1	0	<-3	1	1	Mutual exclusivity
BCOR	GNAS	429	28	1	0	<-3	1	1	Mutual exclusivity
IDH1	KRAS	411	31	15	1	-0.178	1	1	Mutual exclusivity
BCOR	U2AF2	428	28	2	0	<-3	1	1	Mutual exclusivity
U2AF1_S34	WT1	415	29	14	0	<-3	1	1	Mutual exclusivity
U2AF1_S34	ZRSR2	415	29	14	0	<-3	1	1	Mutual exclusivity
JAK2	CBL	434	10	14	0	<-3	1	1	Mutual exclusivity
NF1	JAK2	431	17	10	0	<-3	1	1	Mutual exclusivity
IDH2	CBL	393	51	13	1	-0.754	1	1	Mutual exclusivity
IDH2	ZRSR2	393	51	13	1	-0.754	1	1	Mutual exclusivity
U2AF1_R156_Q157	KRAS	421	21	16	0	<-3	1	1	Mutual exclusivity
EZH2	KRAS	410	32	15	1	-0.227	1	1	Mutual exclusivity
BRAF	FLT3	418	1	39	0	<-3	1	1	Mutual exclusivity
BRAF	U2AF2	455	1	2	0	<-3	1	1	Mutual exclusivity
U2AF2	U2AF1_other	455	2	1	0	<-3	1	1	Mutual exclusivity
U2AF2	GNAS	455	2	1	0	<-3	1	1	Mutual exclusivity
NRAS	U2AF2	389	67	2	0	<-3	1	1	Mutual exclusivity
RUNX1	U2AF2	378	78	2	0	<-3	1	1	Mutual exclusivity
ETV6	U2AF1_other	446	11	1	0	<-3	1	1	Mutual exclusivity
CEBPA	U2AF1_other	446	11	1	0	<-3	1	1	Mutual exclusivity
ETV6	GNAS	446	11	1	0	<-3	1	1	Mutual exclusivity
CEBPA	GNAS	446	11	1	0	<-3	1	1	Mutual exclusivity
IDH2	U2AF1_R156_Q157	387	50	19	2	-0.296	1	1	Mutual exclusivity
U2AF2	WT1	442	2	14	0	<-3	1	1	Mutual exclusivity
U2AF2	CBL	442	2	14	0	<-3	1	1	Mutual exclusivity
U2AF2	ZRSR2	442	2	14	0	<-3	1	1	Mutual exclusivity
KIT	WT1	436	8	14	0	<-3	1	1	Mutual exclusivity
KIT	ZRSR2	436	8	14	0	<-3	1	1	Mutual exclusivity
ETV6	GATA2	434	11	13	0	<-3	1	1	Mutual exclusivity
U2AF2	U2AF1_R156_Q157	435	2	21	0	<-3	1	1	Mutual exclusivity
BRAF	U2AF1_R156_Q157	436	1	21	0	<-3	1	1	Mutual exclusivity
DNMT3A	CBL	386	58	13	1	-0.966	1	1	Mutual exclusivity
PTPN11	BRAF	433	24	1	0	<-3	1	1	Mutual exclusivity
PTPN11	U2AF1_other	433	24	1	0	<-3	1	1	Mutual exclusivity
PTPN11	GNAS	433	24	1	0	<-3	1	1	Mutual exclusivity
IDH2	JAK2	397	51	9	1	-0.209	1	1	Mutual exclusivity
EZH2	U2AF2	423	33	2	0	<-3	1	1	Mutual exclusivity
KIT	BRAF	449	8	1	0	<-3	1	1	Mutual exclusivity
KIT	U2AF1_other	449	8	1	0	<-3	1	1	Mutual exclusivity
KIT	GNAS	449	8	1	0	<-3	1	1	Mutual exclusivity
WT1	U2AF1_other	443	14	1	0	<-3	1	1	Mutual exclusivity
CBL	U2AF1_other	443	14	1	0	<-3	1	1	Mutual exclusivity
ZRSR2	U2AF1_other	443	14	1	0	<-3	1	1	Mutual exclusivity
WT1	GNAS	443	14	1	0	<-3	1	1	Mutual exclusivity
CBL	GNAS	443	14	1	0	<-3	1	1	Mutual exclusivity
ZRSR2	GNAS	443	14	1	0	<-3	1	1	Mutual exclusivity
TET2	KRAS	384	58	14	2	-0.08	1	1	Mutual exclusivity
RUNX1	BRAF	379	78	1	0	<-3	1	1	Mutual exclusivity
RUNX1	CBL	368	76	12	2	-0.309	1	1	Mutual exclusivity
U2AF2	JAK2	446	2	10	0	<-3	1	1	Mutual exclusivity
TET2	U2AF2	396	60	2	0	<-3	1	1	Mutual exclusivity
ETV6	KRAS	431	11	16	0	<-3	1	1	Mutual exclusivity
CEBPA	KRAS	431	11	16	0	<-3	1	1	Mutual exclusivity
DNMT3A	U2AF2	397	59	2	0	<-3	1	1	Mutual exclusivity
NF1	U2AF1_other	440	17	1	0	<-3	1	1	Mutual exclusivity
PHF6	U2AF1_other	440	17	1	0	<-3	1	1	Mutual exclusivity
NF1	GNAS	440	17	1	0	<-3	1	1	Mutual exclusivity
PHF6	GNAS	440	17	1	0	<-3	1	1	Mutual exclusivity
GATA2	U2AF2	443	13	2	0	<-3	1	1	Mutual exclusivity
BRAF	IDH1	425	1	32	0	<-3	1	1	Mutual exclusivity
IDH1	GNAS	425	32	1	0	<-3	1	1	Mutual exclusivity
U2AF1_S34	BRAF	428	29	1	0	<-3	1	1	Mutual exclusivity
U2AF1_S34	U2AF1_other	428	29	1	0	<-3	1	1	Mutual exclusivity
U2AF1_S34	GNAS	428	29	1	0	<-3	1	1	Mutual exclusivity
TP53	U2AF2	374	82	2	0	<-3	1	1	Mutual exclusivity
ASXL1	U2AF2	374	82	2	0	<-3	1	1	Mutual exclusivity
ETV6	IDH1	415	11	32	0	<-3	1	1	Mutual exclusivity
PTPN11	KIT	426	24	8	0	<-3	1	1	Mutual exclusivity
IDH1	U2AF2	424	32	2	0	<-3	1	1	Mutual exclusivity
ETV6	U2AF2	445	11	2	0	<-3	1	1	Mutual exclusivity
TP53	KIT	369	81	7	1	-0.62	1	1	Mutual exclusivity
ASXL1	KIT	369	81	7	1	-0.62	1	1	Mutual exclusivity
STAG2	JAK2	408	40	10	0	<-3	1	1	Mutual exclusivity
KIT	U2AF1_R156_Q157	429	8	21	0	<-3	1	1	Mutual exclusivity
WT1	CBL	430	14	14	0	<-3	1	1	Mutual exclusivity
WT1	ZRSR2	430	14	14	0	<-3	1	1	Mutual exclusivity
CBL	ZRSR2	430	14	14	0	<-3	1	1	Mutual exclusivity
JAK2	KRAS	432	10	16	0	<-3	1	1	Mutual exclusivity
STAG2	U2AF2	416	40	2	0	<-3	1	1	Mutual exclusivity
BRAF	JAK2	447	1	10	0	<-3	1	1	Mutual exclusivity
JAK2	U2AF1_other	447	10	1	0	<-3	1	1	Mutual exclusivity
JAK2	GNAS	447	10	1	0	<-3	1	1	Mutual exclusivity
EZH2	JAK2	415	33	10	0	<-3	1	1	Mutual exclusivity
ETV6	ASXL1	367	9	80	2	0.028	1	1	Co-occurrence
ETV6	KIT	439	11	8	0	<-3	1	1	Mutual exclusivity
SF3B1	KIT	420	30	8	0	<-3	1	1	Mutual exclusivity
GATA2	ZRSR2	431	13	14	0	<-3	1	1	Mutual exclusivity
DNMT3A	KRAS	385	57	14	2	-0.052	1	1	Mutual exclusivity
U2AF1_S34	JAK2	419	29	10	0	<-3	1	1	Mutual exclusivity
ETV6	JAK2	437	11	10	0	<-3	1	1	Mutual exclusivity
CEBPA	JAK2	437	11	10	0	<-3	1	1	Mutual exclusivity
DNMT3A	BRAF	398	59	1	0	<-3	1	1	Mutual exclusivity
DNMT3A	U2AF1_other	398	59	1	0	<-3	1	1	Mutual exclusivity
DNMT3A	GNAS	398	59	1	0	<-3	1	1	Mutual exclusivity
U2AF2	NPM1	431	2	25	0	<-3	1	1	Mutual exclusivity
IDH2	BRAF	405	52	1	0	<-3	1	1	Mutual exclusivity
IDH2	U2AF1_other	405	52	1	0	<-3	1	1	Mutual exclusivity
IDH2	GNAS	405	52	1	0	<-3	1	1	Mutual exclusivity
U2AF2	KRAS	440	2	16	0	<-3	1	1	Mutual exclusivity
IDH2	U2AF2	404	52	2	0	<-3	1	1	Mutual exclusivity
SRSF2	U2AF2	375	81	2	0	<-3	1	1	Mutual exclusivity
TET2	BRAF	397	60	1	0	<-3	1	1	Mutual exclusivity
TET2	GNAS	397	60	1	0	<-3	1	1	Mutual exclusivity
WT1	JAK2	434	14	10	0	<-3	1	1	Mutual exclusivity
FLT3	U2AF1_other	418	39	1	0	<-3	1	1	Mutual exclusivity
FLT3	GNAS	418	39	1	0	<-3	1	1	Mutual exclusivity
ASXL1	JAK2	367	81	9	1	-0.99	1	1	Mutual exclusivity
U2AF1_R156_Q157	U2AF1_other	436	21	1	0	<-3	1	1	Mutual exclusivity
U2AF1_R156_Q157	GNAS	436	21	1	0	<-3	1	1	Mutual exclusivity
KIT	U2AF2	448	8	2	0	<-3	1	1	Mutual exclusivity
DNMT3A	KIT	392	58	7	1	-0.051	1	1	Mutual exclusivity
GATA2	KIT	437	13	8	0	<-3	1	1	Mutual exclusivity
WT1	KRAS	428	14	16	0	<-3	1	1	Mutual exclusivity
CBL	KRAS	428	14	16	0	<-3	1	1	Mutual exclusivity

## Sheet: MDS
A	B	Neither	A Not B	B Not A	Both	Log2 Odds Ratio	p-Value	q-Value	Tendency
ASXL1	STAG2	2408	495	95	161	>3	<0.001	<0.001	Co-occurrence
ASXL1	RUNX1	2343	473	160	183	2.502	<0.001	<0.001	Co-occurrence
STAG2	SRSF2	2593	139	310	117	2.816	<0.001	<0.001	Co-occurrence
RUNX1	STAG2	2664	239	152	104	2.931	<0.001	<0.001	Co-occurrence
IDH2	SRSF2	2668	64	354	73	>3	<0.001	<0.001	Co-occurrence
RUNX1	SRSF2	2512	220	304	123	2.208	<0.001	<0.001	Co-occurrence
SF3B1	SRSF2	2012	720	406	21	-2.79	<0.001	<0.001	Mutual exclusivity
ASXL1	EZH2	2424	558	79	98	2.43	<0.001	<0.001	Co-occurrence
ASXL1	U2AF1_R156_Q157	2447	575	56	81	2.622	<0.001	<0.001	Co-occurrence
ASXL1	SRSF2	2248	484	255	172	1.647	<0.001	<0.001	Co-occurrence
RUNX1	BCOR	2719	283	97	60	2.571	<0.001	<0.001	Co-occurrence
TET2	ZRSR2	2294	717	58	90	2.312	<0.001	<0.001	Co-occurrence
TET2	SRSF2	2115	617	237	190	1.458	<0.001	<0.001	Co-occurrence
RUNX1	EZH2	2699	283	117	60	2.29	<0.001	<0.001	Co-occurrence
PHF6	U2AF1_R156_Q157	2948	74	108	29	>3	<0.001	<0.001	Co-occurrence
IDH2	STAG2	2809	94	213	43	2.593	<0.001	<0.001	Co-occurrence
STAG2	BCOR	2792	210	111	46	2.462	<0.001	<0.001	Co-occurrence
DNMT3A	SF3B1	2124	294	562	179	1.202	<0.001	<0.001	Co-occurrence
U2AF1_S34	BCOR	2913	89	128	29	2.891	<0.001	<0.001	Co-occurrence
ASXL1	PHF6	2455	601	48	55	2.227	<0.001	<0.001	Co-occurrence
ASXL1	TP53	2207	635	296	21	-2.02	<0.001	<0.001	Mutual exclusivity
STAG2	CEBPA	2872	232	31	24	>3	<0.001	<0.001	Co-occurrence
U2AF1_R156_Q157	SF3B1	2284	134	738	3	<-3	<0.001	<0.001	Mutual exclusivity
ASXL1	SF3B1	1854	564	649	92	-1.102	<0.001	<0.001	Mutual exclusivity
IDH1	SRSF2	2687	45	393	34	2.369	<0.001	<0.001	Co-occurrence
U2AF1_S34	SF3B1	2303	115	738	3	<-3	<0.001	<0.001	Mutual exclusivity
ASXL1	DNMT3A	2079	607	424	49	-1.337	<0.001	<0.001	Mutual exclusivity
TP53	STAG2	2588	315	254	2	<-3	<0.001	<0.001	Mutual exclusivity
TP53	SRSF2	2426	306	416	11	-2.254	<0.001	<0.001	Mutual exclusivity
ASXL1	CEBPA	2480	624	23	32	2.467	<0.001	<0.001	Co-occurrence
RUNX1	TP53	2506	336	310	7	-2.57	<0.001	<0.001	Mutual exclusivity
TET2	SF3B1	1863	555	489	252	0.791	<0.001	<0.001	Co-occurrence
NPM1	WT1	3092	22	37	8	>3	<0.001	<0.001	Co-occurrence
ASXL1	IDH2	2424	598	79	58	1.573	<0.001	<0.001	Co-occurrence
EZH2	STAG2	2764	139	218	38	1.793	<0.001	<0.001	Co-occurrence
TET2	TP53	2076	766	276	41	-1.313	<0.001	<0.001	Mutual exclusivity
ZRSR2	EZH2	2861	121	150	27	2.09	<0.001	<0.001	Co-occurrence
RUNX1	NRAS	2754	314	62	29	2.036	<0.001	<0.001	Co-occurrence
TP53	SF3B1	2138	280	704	37	-1.317	<0.001	<0.001	Mutual exclusivity
U2AF1_S34	SRSF2	2614	118	427	0	<-3	<0.001	<0.001	Mutual exclusivity
DNMT3A	SRSF2	2288	444	398	29	-1.413	<0.001	<0.001	Mutual exclusivity
ZRSR2	SF3B1	2280	138	731	10	-2.146	<0.001	<0.001	Mutual exclusivity
NRAS	STAG2	2836	67	232	24	2.131	<0.001	<0.001	Co-occurrence
TET2	IDH2	2226	796	126	11	-2.034	<0.001	<0.001	Mutual exclusivity
PHF6	RUNX1	2742	74	314	29	1.775	<0.001	<0.001	Co-occurrence
U2AF1_R156_Q157	SRSF2	2597	135	425	2	<-3	<0.001	<0.001	Mutual exclusivity
SF3B1	STAG2	2192	711	226	30	-1.289	<0.001	<0.001	Mutual exclusivity
RUNX1	TET2	2134	218	682	125	0.843	<0.001	<0.001	Co-occurrence
DNMT3A	BCOR	2575	427	111	46	1.321	<0.001	<0.001	Co-occurrence
NPM1	NRAS	3045	23	84	7	>3	<0.001	<0.001	Co-occurrence
RUNX1	CEBPA	2778	326	38	17	1.931	<0.001	<0.001	Co-occurrence
ASXL1	ZRSR2	2407	604	96	52	1.11	<0.001	<0.001	Co-occurrence
PHF6	SF3B1	2323	95	733	8	-1.906	<0.001	<0.001	Mutual exclusivity
ASXL1	TET2	1905	447	598	209	0.575	<0.001	<0.001	Co-occurrence
ASXL1	U2AF2	2495	643	8	13	2.657	<0.001	<0.001	Co-occurrence
SRSF2	CEBPA	2696	408	36	19	1.802	<0.001	<0.001	Co-occurrence
TET2	CEBPA	2325	779	27	28	1.63	<0.001	<0.001	Co-occurrence
TP53	U2AF1_S34	2725	316	117	1	<-3	<0.001	<0.001	Mutual exclusivity
SRSF2	KRAS	2705	411	27	16	1.964	<0.001	<0.001	Co-occurrence
ZRSR2	DNMT3A	2545	141	466	7	-1.883	<0.001	<0.001	Mutual exclusivity
EZH2	SRSF2	2563	169	419	8	-1.788	<0.001	<0.001	Mutual exclusivity
ETV6	SRSF2	2693	39	408	19	1.685	<0.001	0.001	Co-occurrence
NRAS	SRSF2	2667	65	401	26	1.412	<0.001	0.001	Co-occurrence
STAG2	U2AF2	2890	248	13	8	2.842	<0.001	0.001	Co-occurrence
NRAS	KRAS	3032	84	36	7	2.811	<0.001	0.002	Co-occurrence
ASXL1	NRAS	2446	622	57	34	1.23	<0.001	0.002	Co-occurrence
ETV6	NRAS	3018	50	83	8	2.54	<0.001	0.002	Co-occurrence
TET2	EZH2	2242	740	110	67	0.884	<0.001	0.002	Co-occurrence
NPM1	FLT3	3099	26	30	4	>3	<0.001	0.002	Co-occurrence
ASXL1	KRAS	2479	637	24	19	1.623	<0.001	0.004	Co-occurrence
NF1	BCOR	2922	80	144	13	1.721	<0.001	0.004	Co-occurrence
NPM1	KRAS	3090	26	39	4	>3	<0.001	0.005	Co-occurrence
ASXL1	CBL	2427	617	76	39	1.013	<0.001	0.007	Co-occurrence
U2AF1_S34	ETV6	2991	110	50	8	2.121	0.001	0.009	Co-occurrence
WT1	FLT3	3084	41	30	4	>3	0.001	0.009	Co-occurrence
NRAS	BCOR	2923	79	145	12	1.615	0.002	0.011	Co-occurrence
NRAS	WT1	3029	85	39	6	2.455	0.002	0.011	Co-occurrence
U2AF1_R156_Q157	PTPN11	2988	130	34	7	2.242	0.002	0.011	Co-occurrence
RUNX1	IDH1	2755	325	61	18	1.323	0.002	0.011	Co-occurrence
PHF6	DNMT3A	2588	98	468	5	-1.826	0.002	0.012	Mutual exclusivity
ETV6	GNAS	3057	53	44	5	2.712	0.002	0.012	Co-occurrence
RUNX1	SF3B1	2133	285	683	58	-0.654	0.002	0.016	Mutual exclusivity
RUNX1	ZRSR2	2696	315	120	28	0.998	0.003	0.018	Co-occurrence
ASXL1	ETV6	2467	634	36	22	1.25	0.003	0.018	Co-occurrence
TET2	STAG2	2182	721	170	86	0.614	0.003	0.018	Co-occurrence
DNMT3A	NPM1	2667	462	19	11	1.741	0.003	0.018	Co-occurrence
ASXL1	PTPN11	2479	639	24	17	1.458	0.003	0.018	Co-occurrence
ASXL1	GATA2	2481	640	22	16	1.495	0.004	0.024	Co-occurrence
PHF6	CBL	2951	93	105	10	1.596	0.004	0.024	Co-occurrence
TP53	IDH1	2764	316	78	1	<-3	0.004	0.024	Mutual exclusivity
BCOR	SRSF2	2609	123	393	34	0.876	0.004	0.024	Co-occurrence
U2AF1_R156_Q157	EZH2	2861	121	161	16	1.233	0.004	0.024	Co-occurrence
EZH2	NRAS	2903	165	79	12	1.418	0.004	0.026	Co-occurrence
NF1	GATA2	3033	88	33	5	2.385	0.005	0.027	Co-occurrence
SF3B1	ETV6	2365	736	53	5	-1.722	0.005	0.027	Mutual exclusivity
ASXL1	IDH1	2451	629	52	27	1.017	0.005	0.027	Co-occurrence
SRSF2	GNAS	2697	413	35	14	1.385	0.005	0.028	Co-occurrence
RUNX1	U2AF2	2802	336	14	7	2.06	0.005	0.029	Co-occurrence
BCOR	CEBPA	2955	149	47	8	1.755	0.005	0.029	Co-occurrence
WT1	CBL	3005	39	109	6	2.085	0.005	0.029	Co-occurrence
U2AF1_R156_Q157	GATA2	2990	131	32	6	2.097	0.005	0.029	Co-occurrence
SF3B1	IDH2	2300	722	118	19	-0.963	0.005	0.029	Mutual exclusivity
U2AF1_S34	NRAS	2959	109	82	9	1.575	0.006	0.034	Co-occurrence
NF1	PTPN11	3030	88	36	5	2.258	0.006	0.035	Co-occurrence
ETV6	NF1	3014	52	87	6	1.999	0.007	0.035	Co-occurrence
WT1	CEBPA	3063	41	51	4	2.551	0.007	0.038	Co-occurrence
ETV6	KRAS	3062	54	39	4	2.54	0.007	0.039	Co-occurrence
TET2	GATA2	2317	804	35	3	-2.017	0.009	0.044	Mutual exclusivity
PHF6	NRAS	2973	95	83	8	1.593	0.009	0.045	Co-occurrence
ASXL1	NF1	2440	626	63	30	0.892	0.009	0.045	Co-occurrence
FLT3	PTPN11	3087	31	38	3	2.975	0.009	0.046	Co-occurrence
U2AF1_R156_Q157	U2AF1_S34	2904	137	118	0	<-3	0.009	0.047	Mutual exclusivity
STAG2	GATA2	2873	248	30	8	1.627	0.01	0.048	Co-occurrence
SF3B1	KRAS	2378	738	40	3	-2.049	0.01	0.048	Mutual exclusivity
ZRSR2	TP53	2700	142	311	6	-1.447	0.011	0.053	Mutual exclusivity
PHF6	TET2	2287	65	769	38	0.798	0.011	0.053	Co-occurrence
EZH2	BRAF	2976	174	6	3	>3	0.011	0.054	Co-occurrence
ASXL1	NPM1	2474	655	29	1	-2.941	0.012	0.058	Mutual exclusivity
GATA2	KRAS	3081	35	40	3	2.723	0.014	0.067	Co-occurrence
ETV6	EZH2	2932	50	169	8	1.473	0.014	0.067	Co-occurrence
ASXL1	BCOR	2391	611	112	45	0.653	0.015	0.071	Co-occurrence
U2AF1_R156_Q157	CBL	2918	126	104	11	1.292	0.016	0.072	Co-occurrence
SF3B1	NRAS	2339	729	79	12	-1.037	0.017	0.077	Mutual exclusivity
RUNX1	GATA2	2787	334	29	9	1.373	0.018	0.08	Co-occurrence
TET2	IDH1	2284	796	68	11	-1.107	0.018	0.08	Mutual exclusivity
TET2	NPM1	2324	805	28	2	-2.278	0.018	0.082	Mutual exclusivity
WT1	PTPN11	3076	42	38	3	2.532	0.02	0.087	Co-occurrence
TP53	IDH2	2711	311	131	6	-1.325	0.02	0.087	Mutual exclusivity
SF3B1	WT1	2377	737	41	4	-1.668	0.02	0.087	Mutual exclusivity
TET2	NRAS	2294	774	58	33	0.754	0.02	0.088	Co-occurrence
SF3B1	IDH1	2349	731	69	10	-1.102	0.022	0.093	Mutual exclusivity
NPM1	CBL	3018	26	111	4	2.065	0.022	0.093	Co-occurrence
NRAS	GATA2	3034	87	34	4	2.037	0.023	0.095	Co-occurrence
ETV6	FLT3	3070	55	31	3	2.433	0.023	0.098	Co-occurrence
IDH2	BCOR	2878	124	144	13	1.067	0.024	0.099	Co-occurrence
GNAS	PTPN11	3072	46	38	3	2.398	0.025	0.102	Co-occurrence
RUNX1	FLT3	2790	335	26	8	1.358	0.026	0.105	Co-occurrence
RUNX1	NF1	2740	326	76	17	0.911	0.027	0.109	Co-occurrence
SF3B1	NPM1	2390	739	28	2	-2.114	0.029	0.116	Mutual exclusivity
NRAS	PTPN11	3031	87	37	4	1.913	0.029	0.116	Co-occurrence
PHF6	TP53	2743	99	313	4	-1.498	0.03	0.119	Mutual exclusivity
EZH2	KRAS	2945	171	37	6	1.482	0.031	0.121	Co-occurrence
CBL	FLT3	3014	111	30	4	1.856	0.033	0.131	Co-occurrence
U2AF1_R156_Q157	ZRSR2	2886	125	136	12	1.027	0.035	0.135	Co-occurrence
JAK2	CEBPA	3036	68	51	4	1.808	0.035	0.137	Co-occurrence
NF1	KIT	3044	90	22	3	2.205	0.036	0.137	Co-occurrence
NF1	KRAS	3027	89	39	4	1.803	0.036	0.138	Co-occurrence
U2AF1_R156_Q157	DNMT3A	2561	125	461	12	-0.907	0.037	0.14	Mutual exclusivity
U2AF1_R156_Q157	ETV6	2970	131	52	6	1.387	0.038	0.143	Co-occurrence
ETV6	PTPN11	3063	55	38	3	2.136	0.038	0.143	Co-occurrence
TP53	CEBPA	2788	316	54	1	-2.614	0.039	0.144	Mutual exclusivity
TET2	KIT	2338	796	14	11	1.207	0.04	0.147	Co-occurrence
PHF6	SRSF2	2636	96	420	7	-1.128	0.04	0.147	Mutual exclusivity
WT1	NF1	3025	41	89	4	1.729	0.042	0.152	Co-occurrence
ZRSR2	U2AF1_S34	2894	147	117	1	-2.571	0.043	0.154	Mutual exclusivity
RUNX1	KRAS	2782	334	34	9	1.141	0.045	0.16	Co-occurrence
TET2	GNAS	2322	788	30	19	0.9	0.046	0.164	Co-occurrence
RUNX1	KIT	2797	337	19	6	1.39	0.047	0.165	Co-occurrence
TET2	ETV6	2302	799	50	8	-1.117	0.047	0.165	Mutual exclusivity
EZH2	BCOR	2840	162	142	15	0.889	0.047	0.165	Co-occurrence
TET2	PTPN11	2316	802	36	5	-1.318	0.048	0.168	Mutual exclusivity
ZRSR2	SRSF2	2596	136	415	12	-0.857	0.049	0.168	Mutual exclusivity
U2AF1_S34	NF1	2948	118	93	0	<-3	0.049	0.168	Mutual exclusivity
U2AF1_R156_Q157	RUNX1	2701	115	321	22	0.687	0.05	0.17	Co-occurrence
BCOR	PTPN11	2966	152	36	5	1.438	0.05	0.171	Co-occurrence
NF1	GNAS	3021	89	45	4	1.593	0.054	0.184	Co-occurrence
NPM1	PTPN11	3090	28	39	2	2.501	0.057	0.191	Co-occurrence
EZH2	GATA2	2949	172	33	5	1.377	0.058	0.195	Co-occurrence
NF1	JAK2	2999	88	67	5	1.347	0.059	0.196	Co-occurrence
IDH1	STAG2	2835	68	245	11	0.904	0.061	0.2	Co-occurrence
IDH2	NF1	2937	129	85	8	1.1	0.062	0.203	Co-occurrence
DNMT3A	JAK2	2619	468	67	5	-1.26	0.064	0.209	Mutual exclusivity
ETV6	BCOR	2950	52	151	6	1.173	0.066	0.212	Co-occurrence
SF3B1	BCOR	2288	714	130	27	-0.587	0.066	0.212	Mutual exclusivity
U2AF1_R156_Q157	BCOR	2867	135	155	2	-1.868	0.066	0.212	Mutual exclusivity
TP53	NPM1	2812	317	30	0	<-3	0.067	0.213	Mutual exclusivity
CBL	U2AF1_other	3034	113	10	2	2.425	0.068	0.217	Co-occurrence
BRAF	KIT	3126	8	24	1	>3	0.069	0.218	Co-occurrence
ZRSR2	NRAS	2928	140	83	8	1.011	0.073	0.227	Co-occurrence
NRAS	FLT3	3037	88	31	3	1.74	0.073	0.227	Co-occurrence
TP53	BCOR	2694	308	148	9	-0.911	0.075	0.233	Mutual exclusivity
IDH1	NRAS	2994	74	86	5	1.234	0.076	0.233	Co-occurrence
ZRSR2	GNAS	2967	143	44	5	1.237	0.077	0.235	Co-occurrence
FLT3	KRAS	3084	32	41	2	2.233	0.077	0.235	Co-occurrence
ASXL1	KIT	2487	647	16	9	1.112	0.079	0.24	Co-occurrence
TET2	KRAS	2325	791	27	16	0.801	0.081	0.242	Co-occurrence
SF3B1	U2AF1_other	2406	741	12	0	<-3	0.081	0.242	Mutual exclusivity
IDH1	NF1	2992	74	88	5	1.2	0.081	0.242	Co-occurrence
TP53	WT1	2798	316	44	1	-2.313	0.082	0.243	Mutual exclusivity
NPM1	BRAF	3121	29	8	1	>3	0.082	0.243	Co-occurrence
TET2	U2AF1_S34	2256	785	96	22	-0.603	0.085	0.251	Mutual exclusivity
GATA2	PTPN11	3082	36	39	2	2.134	0.086	0.252	Co-occurrence
IDH2	CEBPA	2972	132	50	5	1.171	0.088	0.255	Co-occurrence
IDH1	KRAS	3040	76	40	3	1.585	0.091	0.262	Co-occurrence
KIT	U2AF1_other	3123	24	11	1	>3	0.091	0.262	Co-occurrence
CBL	SRSF2	2639	93	405	22	0.624	0.094	0.266	Co-occurrence
BCOR	GNAS	2958	152	44	5	1.145	0.094	0.266	Co-occurrence
NPM1	CEBPA	3076	28	53	2	2.052	0.095	0.268	Co-occurrence
IDH2	CBL	2916	128	106	9	0.952	0.095	0.268	Co-occurrence
IDH1	WT1	3038	76	42	3	1.514	0.101	0.284	Co-occurrence
TET2	CBL	2274	770	78	37	0.486	0.103	0.286	Co-occurrence
PHF6	U2AF1_S34	2945	96	111	7	0.952	0.107	0.296	Co-occurrence
STAG2	FLT3	2869	256	34	0	<-3	0.108	0.298	Mutual exclusivity
ZRSR2	KIT	2989	145	22	3	1.491	0.109	0.301	Co-occurrence
DNMT3A	CBL	2582	462	104	11	-0.758	0.11	0.301	Mutual exclusivity
DNMT3A	IDH2	2576	446	110	27	0.504	0.112	0.306	Co-occurrence
KRAS	BRAF	3108	42	8	1	>3	0.116	0.315	Co-occurrence
BCOR	GATA2	2968	153	34	4	1.19	0.117	0.316	Co-occurrence
TP53	ETV6	2786	315	56	2	-1.663	0.119	0.32	Mutual exclusivity
U2AF1_S34	IDH1	2962	118	79	0	<-3	0.12	0.321	Mutual exclusivity
ZRSR2	STAG2	2772	131	239	17	0.59	0.123	0.327	Co-occurrence
WT1	KRAS	3073	43	41	2	1.802	0.124	0.327	Co-occurrence
BCOR	KIT	2980	154	22	3	1.4	0.125	0.327	Co-occurrence
PHF6	GATA2	3021	100	35	3	1.373	0.125	0.327	Co-occurrence
EZH2	CEBPA	2933	171	49	6	1.071	0.125	0.327	Co-occurrence
SF3B1	BRAF	2409	741	9	0	<-3	0.128	0.331	Mutual exclusivity
U2AF1_R156_Q157	TET2	2242	110	780	27	-0.503	0.132	0.342	Mutual exclusivity
TP53	DNMT3A	2407	279	435	38	-0.408	0.135	0.347	Mutual exclusivity
ETV6	STAG2	2853	50	248	8	0.88	0.137	0.351	Co-occurrence
CBL	U2AF1_both	3041	114	3	1	>3	0.138	0.352	Co-occurrence
IDH2	NPM1	2995	134	27	3	1.312	0.139	0.352	Co-occurrence
DNMT3A	NF1	2612	454	74	19	0.563	0.14	0.354	Co-occurrence
GNAS	KRAS	3069	47	41	2	1.671	0.143	0.359	Co-occurrence
SF3B1	CEBPA	2371	733	47	8	-0.861	0.147	0.369	Mutual exclusivity
PHF6	ZRSR2	2916	95	140	8	0.811	0.148	0.369	Co-occurrence
DNMT3A	FLT3	2660	465	26	8	0.816	0.152	0.377	Co-occurrence
ETV6	GATA2	3065	56	36	2	1.604	0.153	0.379	Co-occurrence
STAG2	KRAS	2866	250	37	6	0.895	0.156	0.384	Co-occurrence
TP53	EZH2	2677	305	165	12	-0.648	0.157	0.384	Mutual exclusivity
NRAS	KIT	3045	89	23	2	1.573	0.161	0.393	Co-occurrence
PHF6	KRAS	3016	100	40	3	1.178	0.163	0.397	Co-occurrence
IDH1	NPM1	3052	77	28	2	1.501	0.172	0.415	Co-occurrence
STAG2	NF1	2821	245	82	11	0.627	0.177	0.426	Co-occurrence
PHF6	WT1	3014	100	42	3	1.106	0.18	0.431	Co-occurrence
TP53	PTPN11	2808	310	34	7	0.899	0.182	0.435	Co-occurrence
PHF6	EZH2	2888	94	168	9	0.719	0.185	0.439	Co-occurrence
CEBPA	U2AF1_other	3093	54	11	1	2.38	0.19	0.451	Co-occurrence
ASXL1	U2AF1_both	2501	654	2	2	1.935	0.193	0.454	Co-occurrence
ETV6	WT1	3058	56	43	2	1.345	0.2	0.468	Co-occurrence
SF3B1	EZH2	2275	707	143	34	-0.386	0.201	0.469	Mutual exclusivity
CBL	KRAS	3004	112	40	3	1.008	0.205	0.477	Co-occurrence
IDH1	FLT3	3048	77	32	2	1.307	0.208	0.483	Co-occurrence
NRAS	CEBPA	3016	88	52	3	0.984	0.21	0.485	Co-occurrence
TP53	NF1	2762	304	80	13	0.562	0.217	0.499	Co-occurrence
TET2	JAK2	2303	784	49	23	0.463	0.219	0.501	Co-occurrence
GATA2	U2AF2	3101	37	20	1	2.067	0.225	0.513	Co-occurrence
NRAS	BRAF	3060	90	8	1	2.087	0.232	0.526	Co-occurrence
BCOR	FLT3	2971	154	31	3	0.901	0.237	0.536	Co-occurrence
FLT3	KIT	3101	33	24	1	1.969	0.238	0.536	Co-occurrence
U2AF1_S34	DNMT3A	2590	96	451	22	0.396	0.239	0.537	Co-occurrence
U2AF1_S34	IDH2	2906	116	135	2	-1.43	0.243	0.542	Mutual exclusivity
EZH2	NF1	2897	169	85	8	0.69	0.245	0.543	Co-occurrence
RUNX1	NPM1	2787	342	29	1	-1.831	0.246	0.543	Mutual exclusivity
TET2	BRAF	2347	803	5	4	1.225	0.246	0.543	Co-occurrence
TP53	FLT3	2809	316	33	1	-1.892	0.249	0.548	Mutual exclusivity
KRAS	U2AF2	3096	42	20	1	1.882	0.251	0.55	Co-occurrence
RUNX1	BRAF	2809	341	7	2	1.235	0.255	0.556	Co-occurrence
PHF6	BRAF	3048	102	8	1	1.901	0.258	0.561	Co-occurrence
ZRSR2	GATA2	2973	148	38	0	<-3	0.259	0.561	Mutual exclusivity
IDH2	PTPN11	2981	137	41	0	<-3	0.26	0.561	Mutual exclusivity
RUNX1	DNMT3A	2387	299	429	44	-0.288	0.262	0.561	Mutual exclusivity
IDH1	JAK2	3008	79	72	0	<-3	0.262	0.561	Mutual exclusivity
SF3B1	PTPN11	2383	735	35	6	-0.847	0.264	0.562	Mutual exclusivity
NF1	FLT3	3034	91	32	2	1.059	0.265	0.562	Co-occurrence
WT1	SRSF2	2690	42	424	3	-1.142	0.268	0.568	Mutual exclusivity
STAG2	JAK2	2834	253	69	3	-1.038	0.277	0.584	Mutual exclusivity
KIT	PTPN11	3094	24	40	1	1.688	0.28	0.585	Co-occurrence
GNAS	U2AF2	3090	48	20	1	1.687	0.281	0.585	Co-occurrence
BCOR	U2AF2	2983	155	19	2	1.018	0.281	0.585	Co-occurrence
NF1	SRSF2	2655	77	411	16	0.425	0.282	0.586	Co-occurrence
CBL	BRAF	3036	114	8	1	1.735	0.284	0.588	Co-occurrence
EZH2	CBL	2876	168	106	9	0.54	0.297	0.613	Co-occurrence
U2AF1_R156_Q157	CEBPA	2971	133	51	4	0.809	0.299	0.615	Co-occurrence
WT1	KIT	3090	44	24	1	1.549	0.302	0.619	Co-occurrence
NPM1	GATA2	3092	29	37	1	1.527	0.306	0.623	Co-occurrence
SF3B1	FLT3	2389	736	29	5	-0.837	0.308	0.626	Mutual exclusivity
U2AF2	CEBPA	3084	20	54	1	1.514	0.309	0.626	Co-occurrence
EZH2	WT1	2941	173	41	4	0.73	0.316	0.638	Co-occurrence
TET2	U2AF2	2334	804	18	3	-1.047	0.318	0.64	Mutual exclusivity
ZRSR2	NF1	2920	146	91	2	-1.186	0.322	0.645	Mutual exclusivity
U2AF1_S34	CBL	2928	116	113	2	-1.162	0.323	0.645	Mutual exclusivity
GNAS	KIT	3086	48	24	1	1.422	0.325	0.646	Co-occurrence
RUNX1	WT1	2778	336	38	7	0.607	0.329	0.652	Co-occurrence
DNMT3A	IDH1	2622	458	64	15	0.424	0.336	0.662	Co-occurrence
SF3B1	GATA2	2386	735	32	6	-0.716	0.336	0.662	Mutual exclusivity
GATA2	FLT3	3088	37	33	1	1.339	0.339	0.665	Co-occurrence
TP53	CBL	2735	309	107	8	-0.596	0.342	0.665	Mutual exclusivity
SF3B1	KIT	2401	733	17	8	0.624	0.342	0.665	Co-occurrence
NRAS	NF1	2979	87	89	4	0.622	0.342	0.665	Co-occurrence
SRSF2	U2AF2	2712	426	20	1	-1.651	0.346	0.668	Mutual exclusivity
IDH1	GNAS	3033	77	47	2	0.745	0.348	0.67	Co-occurrence
SRSF2	BRAF	2725	425	7	2	0.873	0.349	0.67	Co-occurrence
DNMT3A	U2AF2	2666	472	20	1	-1.824	0.351	0.67	Mutual exclusivity
ZRSR2	BRAF	3003	147	8	1	1.353	0.351	0.67	Co-occurrence
PHF6	BCOR	2906	96	150	7	0.498	0.355	0.674	Co-occurrence
DNMT3A	GATA2	2651	470	35	3	-1.049	0.356	0.675	Mutual exclusivity
DNMT3A	STAG2	2463	440	223	33	-0.272	0.362	0.683	Mutual exclusivity
RUNX1	U2AF1_S34	2714	327	102	16	0.381	0.364	0.684	Co-occurrence
U2AF1_S34	FLT3	3009	116	32	2	0.697	0.365	0.684	Co-occurrence
SRSF2	KIT	2712	422	20	5	0.684	0.371	0.691	Co-occurrence
DNMT3A	BRAF	2677	473	9	0	<-3	0.372	0.691	Mutual exclusivity
ETV6	KIT	3077	57	24	1	1.169	0.372	0.691	Co-occurrence
TP53	NRAS	2757	311	85	6	-0.676	0.374	0.692	Mutual exclusivity
U2AF1_R156_Q157	IDH2	2893	129	129	8	0.476	0.386	0.712	Co-occurrence
NF1	CBL	2956	88	110	5	0.611	0.389	0.713	Co-occurrence
PHF6	PTPN11	3017	101	39	2	0.615	0.389	0.713	Co-occurrence
TET2	BCOR	2230	772	122	35	-0.271	0.398	0.723	Mutual exclusivity
SF3B1	JAK2	2366	721	52	20	0.336	0.399	0.723	Co-occurrence
ZRSR2	NPM1	2981	148	30	0	<-3	0.399	0.723	Mutual exclusivity
NPM1	BCOR	2972	30	157	0	<-3	0.4	0.723	Mutual exclusivity
U2AF1_S34	GATA2	3003	118	38	0	<-3	0.401	0.723	Mutual exclusivity
ASXL1	BRAF	2497	653	6	3	0.935	0.405	0.726	Co-occurrence
DNMT3A	U2AF1_other	2677	470	9	3	0.925	0.405	0.726	Co-occurrence
ZRSR2	IDH2	2878	144	133	4	-0.734	0.41	0.733	Mutual exclusivity
U2AF1_R156_Q157	STAG2	2774	129	248	8	-0.528	0.422	0.749	Mutual exclusivity
WT1	GATA2	3077	44	37	1	0.918	0.422	0.749	Co-occurrence
DNMT3A	GNAS	2642	468	44	5	-0.64	0.424	0.75	Mutual exclusivity
KRAS	PTPN11	3076	42	40	1	0.873	0.432	0.76	Co-occurrence
U2AF1_R156_Q157	KRAS	2982	134	40	3	0.739	0.432	0.76	Co-occurrence
EZH2	FLT3	2951	174	31	3	0.715	0.436	0.763	Co-occurrence
U2AF1_R156_Q157	NF1	2931	135	91	2	-1.067	0.437	0.763	Mutual exclusivity
JAK2	KIT	3063	71	24	1	0.846	0.439	0.763	Co-occurrence
SF3B1	U2AF2	2400	738	18	3	-0.884	0.441	0.763	Mutual exclusivity
ZRSR2	BCOR	2859	143	152	5	-0.605	0.442	0.763	Mutual exclusivity
RUNX1	PTPN11	2781	337	35	6	0.5	0.444	0.763	Co-occurrence
RUNX1	CBL	2716	328	100	15	0.313	0.444	0.763	Co-occurrence
IDH2	EZH2	2850	132	172	5	-0.672	0.445	0.763	Mutual exclusivity
FLT3	SRSF2	2704	28	421	6	0.461	0.45	0.769	Co-occurrence
FLT3	CEBPA	3071	33	54	1	0.785	0.451	0.769	Co-occurrence
ZRSR2	KRAS	2971	145	40	3	0.62	0.452	0.769	Co-occurrence
PHF6	IDH2	2925	97	131	6	0.466	0.454	0.77	Co-occurrence
U2AF1_S34	CEBPA	2989	115	52	3	0.584	0.459	0.775	Co-occurrence
NRAS	U2AF2	3048	90	20	1	0.76	0.46	0.775	Co-occurrence
ASXL1	WT1	2465	649	38	7	-0.515	0.462	0.777	Mutual exclusivity
ZRSR2	WT1	2969	145	42	3	0.548	0.467	0.781	Co-occurrence
ETV6	CBL	2989	55	112	3	0.542	0.468	0.781	Co-occurrence
U2AF1_R156_Q157	GNAS	2976	134	46	3	0.534	0.47	0.781	Co-occurrence
IDH1	KIT	3056	78	24	1	0.707	0.47	0.781	Co-occurrence
TP53	GNAS	2796	314	46	3	-0.784	0.476	0.788	Mutual exclusivity
ASXL1	GNAS	2466	644	37	12	0.313	0.482	0.795	Co-occurrence
RUNX1	GNAS	2774	336	42	7	0.46	0.483	0.795	Co-occurrence
ASXL1	U2AF1_S34	2406	635	97	21	-0.286	0.488	0.8	Mutual exclusivity
U2AF1_S34	STAG2	2792	111	249	7	-0.5	0.491	0.803	Mutual exclusivity
EZH2	U2AF1_other	2971	176	11	1	0.618	0.5	0.815	Co-occurrence
PHF6	JAK2	2987	100	69	3	0.377	0.508	0.827	Co-occurrence
ETV6	IDH2	2965	57	136	1	-1.387	0.517	0.838	Mutual exclusivity
ZRSR2	ETV6	2954	147	57	1	-1.504	0.523	0.843	Mutual exclusivity
EZH2	GNAS	2934	176	48	1	-1.526	0.523	0.843	Mutual exclusivity
STAG2	BRAF	2895	255	8	1	0.505	0.533	0.857	Co-occurrence
TET2	NF1	2280	786	72	21	-0.241	0.548	0.879	Mutual exclusivity
DNMT3A	NRAS	2606	462	80	11	-0.367	0.55	0.88	Mutual exclusivity
IDH2	JAK2	2954	133	68	4	0.386	0.553	0.881	Co-occurrence
PHF6	KIT	3032	102	24	1	0.309	0.565	0.898	Co-occurrence
RUNX1	JAK2	2753	334	63	9	0.236	0.57	0.903	Co-occurrence
NRAS	CBL	2957	87	111	4	0.293	0.573	0.905	Co-occurrence
ZRSR2	JAK2	2943	144	68	4	0.266	0.579	0.908	Co-occurrence
SF3B1	U2AF1_both	2414	741	4	0	<-3	0.579	0.908	Mutual exclusivity
U2AF1_R156_Q157	IDH1	2945	135	77	2	-0.82	0.582	0.908	Mutual exclusivity
IDH1	IDH2	2945	77	135	2	-0.82	0.582	0.908	Mutual exclusivity
BCOR	JAK2	2932	155	70	2	-0.888	0.582	0.908	Mutual exclusivity
ZRSR2	IDH1	2934	146	77	2	-0.938	0.585	0.91	Mutual exclusivity
NPM1	NF1	3037	29	92	1	0.187	0.594	0.92	Co-occurrence
U2AF1_R156_Q157	NRAS	2936	132	86	5	0.371	0.595	0.92	Co-occurrence
JAK2	SRSF2	2671	61	416	11	0.211	0.603	0.93	Co-occurrence
CBL	KIT	3020	114	24	1	0.142	0.606	0.93	Co-occurrence
U2AF1_R156_Q157	U2AF2	3002	136	20	1	0.142	0.607	0.93	Co-occurrence
SF3B1	GNAS	2382	728	36	13	0.241	0.611	0.933	Co-occurrence
TP53	BRAF	2833	317	9	0	<-3	0.612	0.933	Mutual exclusivity
IDH1	EZH2	2906	76	174	3	-0.601	0.625	0.944	Mutual exclusivity
JAK2	KRAS	3044	72	43	0	<-3	0.625	0.944	Mutual exclusivity
WT1	JAK2	3042	45	72	0	<-3	0.625	0.944	Mutual exclusivity
PHF6	FLT3	3022	103	34	0	<-3	0.627	0.944	Mutual exclusivity
EZH2	U2AF2	2961	177	21	0	<-3	0.628	0.944	Mutual exclusivity
RUNX1	U2AF1_other	2804	343	12	0	<-3	0.632	0.947	Mutual exclusivity
GATA2	SRSF2	2700	32	421	6	0.266	0.634	0.948	Co-occurrence
U2AF1_R156_Q157	NPM1	2992	137	30	0	<-3	0.639	0.954	Mutual exclusivity
ETV6	JAK2	3029	58	72	0	<-3	0.643	0.956	Mutual exclusivity
SRSF2	PTPN11	2695	423	37	4	-0.538	0.646	0.957	Mutual exclusivity
TET2	DNMT3A	2004	682	348	125	0.078	0.647	0.957	Co-occurrence
EZH2	KIT	2959	175	23	2	0.556	0.648	0.957	Co-occurrence
NRAS	GNAS	3021	89	47	2	0.53	0.651	0.959	Co-occurrence
IDH1	ETV6	3024	77	56	2	0.488	0.656	0.96	Co-occurrence
ZRSR2	CBL	2902	142	109	6	0.17	0.657	0.96	Co-occurrence
CBL	BCOR	2891	111	153	4	-0.554	0.66	0.96	Mutual exclusivity
ASXL1	JAK2	2444	643	59	13	-0.256	0.66	0.96	Mutual exclusivity
CBL	PTPN11	3005	113	39	2	0.448	0.66	0.96	Co-occurrence
U2AF1_R156_Q157	TP53	2720	122	302	15	0.147	0.664	0.961	Co-occurrence
U2AF1_S34	PTPN11	3002	116	39	2	0.408	0.665	0.961	Co-occurrence
DNMT3A	KRAS	2648	468	38	5	-0.426	0.67	0.966	Mutual exclusivity
RUNX1	ETV6	2765	336	51	7	0.176	0.673	0.966	Co-occurrence
PHF6	GNAS	3009	101	47	2	0.342	0.674	0.966	Co-occurrence
U2AF1_S34	EZH2	2869	113	172	5	-0.438	0.683	0.976	Mutual exclusivity
EZH2	NPM1	2954	175	28	2	0.27	0.684	0.976	Co-occurrence
TET2	FLT3	2325	800	27	7	-0.408	0.692	0.984	Mutual exclusivity
TP53	JAK2	2778	309	64	8	0.168	0.693	0.984	Co-occurrence
DNMT3A	CEBPA	2640	464	46	9	0.155	0.705	0.999	Co-occurrence
IDH2	KRAS	2981	135	41	2	0.107	0.71	1	Co-occurrence
PHF6	ETV6	3000	101	56	2	0.085	0.714	1	Co-occurrence
TP53	U2AF2	2822	316	20	1	-1.163	0.716	1	Mutual exclusivity
PHF6	STAG2	2809	94	247	9	0.123	0.716	1	Co-occurrence
STAG2	KIT	2879	255	24	1	-1.088	0.717	1	Mutual exclusivity
ASXL1	U2AF1_other	2494	653	9	3	0.348	0.722	1	Co-occurrence
IDH2	GNAS	2974	136	48	1	-1.134	0.723	1	Mutual exclusivity
EZH2	PTPN11	2942	176	40	1	-1.259	0.727	1	Mutual exclusivity
TET2	U2AF1_other	2342	805	10	2	-0.781	0.742	1	Mutual exclusivity
PHF6	IDH1	2980	100	76	3	0.234	0.743	1	Co-occurrence
DNMT3A	EZH2	2537	445	149	28	0.099	0.745	1	Co-occurrence
CBL	JAK2	2975	112	69	3	0.208	0.746	1	Co-occurrence
PHF6	NF1	2965	101	91	2	-0.632	0.769	1	Mutual exclusivity
STAG2	PTPN11	2864	254	39	2	-0.79	0.77	1	Mutual exclusivity
RUNX1	IDH2	2695	327	121	16	0.124	0.778	1	Co-occurrence
DNMT3A	KIT	2665	469	21	4	0.114	0.782	1	Co-occurrence
STAG2	GNAS	2857	253	46	3	-0.441	0.795	1	Mutual exclusivity
TP53	KRAS	2802	314	40	3	-0.579	0.796	1	Mutual exclusivity
IDH1	BCOR	2927	75	153	4	0.029	0.797	1	Co-occurrence
SF3B1	CBL	2331	713	87	28	0.073	0.823	1	Co-occurrence
DNMT3A	WT1	2648	466	38	7	0.066	0.835	1	Co-occurrence
DNMT3A	ETV6	2637	464	49	9	0.062	0.853	1	Co-occurrence
STAG2	CBL	2796	248	107	8	-0.247	0.861	1	Mutual exclusivity
SF3B1	NF1	2346	720	72	21	-0.073	0.902	1	Mutual exclusivity
GATA2	BRAF	3112	38	9	0	<-3	1	1	Mutual exclusivity
BCOR	BRAF	2993	157	9	0	<-3	1	1	Mutual exclusivity
ETV6	BRAF	3092	58	9	0	<-3	1	1	Mutual exclusivity
U2AF1_R156_Q157	KIT	2998	136	24	1	-0.123	1	1	Mutual exclusivity
IDH2	KIT	2998	136	24	1	-0.123	1	1	Mutual exclusivity
U2AF1_both	U2AF1_other	3143	4	12	0	<-3	1	1	Mutual exclusivity
U2AF2	BRAF	3129	21	9	0	<-3	1	1	Mutual exclusivity
U2AF1_both	KRAS	3112	4	43	0	<-3	1	1	Mutual exclusivity
STAG2	U2AF1_other	2892	255	11	1	0.044	1	1	Co-occurrence
U2AF1_S34	BRAF	3032	118	9	0	<-3	1	1	Mutual exclusivity
U2AF1_both	PTPN11	3114	4	41	0	<-3	1	1	Mutual exclusivity
PTPN11	U2AF1_other	3106	41	12	0	<-3	1	1	Mutual exclusivity
NF1	U2AF1_other	3054	93	12	0	<-3	1	1	Mutual exclusivity
WT1	BRAF	3105	45	9	0	<-3	1	1	Mutual exclusivity
NPM1	U2AF1_other	3117	30	12	0	<-3	1	1	Mutual exclusivity
KRAS	KIT	3091	43	25	0	<-3	1	1	Mutual exclusivity
JAK2	BRAF	3078	72	9	0	<-3	1	1	Mutual exclusivity
TP53	KIT	2819	315	23	2	-0.362	1	1	Mutual exclusivity
FLT3	U2AF1_other	3113	34	12	0	<-3	1	1	Mutual exclusivity
U2AF1_R156_Q157	BRAF	3013	137	9	0	<-3	1	1	Mutual exclusivity
IDH2	BRAF	3013	137	9	0	<-3	1	1	Mutual exclusivity
ASXL1	FLT3	2476	649	27	7	-0.016	1	1	Mutual exclusivity
GATA2	KIT	3096	38	25	0	<-3	1	1	Mutual exclusivity
EZH2	JAK2	2914	173	68	4	-0.013	1	1	Mutual exclusivity
STAG2	U2AF1_both	2899	256	4	0	<-3	1	1	Mutual exclusivity
U2AF1_both	KIT	3130	4	25	0	<-3	1	1	Mutual exclusivity
NF1	U2AF1_both	3062	93	4	0	<-3	1	1	Mutual exclusivity
FLT3	BRAF	3116	34	9	0	<-3	1	1	Mutual exclusivity
BRAF	U2AF1_other	3138	9	12	0	<-3	1	1	Mutual exclusivity
IDH2	GATA2	2985	136	37	1	-0.753	1	1	Mutual exclusivity
U2AF2	KIT	3113	21	25	0	<-3	1	1	Mutual exclusivity
NRAS	U2AF1_other	3056	91	12	0	<-3	1	1	Mutual exclusivity
TP53	U2AF1_other	2831	316	11	1	-0.296	1	1	Mutual exclusivity
U2AF1_R156_Q157	U2AF1_other	3010	137	12	0	<-3	1	1	Mutual exclusivity
IDH2	U2AF1_other	3010	137	12	0	<-3	1	1	Mutual exclusivity
FLT3	U2AF1_both	3121	34	4	0	<-3	1	1	Mutual exclusivity
WT1	U2AF1_both	3110	45	4	0	<-3	1	1	Mutual exclusivity
BCOR	U2AF1_other	2990	157	12	0	<-3	1	1	Mutual exclusivity
U2AF1_R156_Q157	FLT3	2989	136	33	1	-0.586	1	1	Mutual exclusivity
IDH2	FLT3	2989	136	33	1	-0.586	1	1	Mutual exclusivity
DNMT3A	U2AF1_both	2682	473	4	0	<-3	1	1	Mutual exclusivity
U2AF1_both	GNAS	3106	4	49	0	<-3	1	1	Mutual exclusivity
SRSF2	U2AF1_other	2721	426	11	1	-0.784	1	1	Mutual exclusivity
SRSF2	U2AF1_both	2728	427	4	0	<-3	1	1	Mutual exclusivity
U2AF1_both	CEBPA	3100	4	55	0	<-3	1	1	Mutual exclusivity
JAK2	GATA2	3049	72	38	0	<-3	1	1	Mutual exclusivity
NPM1	U2AF1_both	3125	30	4	0	<-3	1	1	Mutual exclusivity
IDH1	U2AF1_both	3076	79	4	0	<-3	1	1	Mutual exclusivity
U2AF1_R156_Q157	U2AF1_both	3018	137	4	0	<-3	1	1	Mutual exclusivity
IDH2	U2AF1_both	3018	137	4	0	<-3	1	1	Mutual exclusivity
KRAS	U2AF1_other	3104	43	12	0	<-3	1	1	Mutual exclusivity
IDH2	NRAS	2935	133	87	4	0.021	1	1	Co-occurrence
GATA2	U2AF1_both	3117	38	4	0	<-3	1	1	Mutual exclusivity
ETV6	U2AF2	3080	58	21	0	<-3	1	1	Mutual exclusivity
BRAF	PTPN11	3109	9	41	0	<-3	1	1	Mutual exclusivity
JAK2	U2AF1_other	3075	72	12	0	<-3	1	1	Mutual exclusivity
NF1	BRAF	3057	93	9	0	<-3	1	1	Mutual exclusivity
NPM1	KIT	3104	30	25	0	<-3	1	1	Mutual exclusivity
BRAF	CEBPA	3095	9	55	0	<-3	1	1	Mutual exclusivity
GATA2	U2AF1_other	3109	38	12	0	<-3	1	1	Mutual exclusivity
TP53	GATA2	2807	314	35	3	-0.384	1	1	Mutual exclusivity
U2AF1_S34	KIT	3016	118	25	0	<-3	1	1	Mutual exclusivity
NPM1	JAK2	3057	30	72	0	<-3	1	1	Mutual exclusivity
NRAS	U2AF1_both	3064	91	4	0	<-3	1	1	Mutual exclusivity
KRAS	CEBPA	3061	43	55	0	<-3	1	1	Mutual exclusivity
GNAS	U2AF1_other	3098	49	12	0	<-3	1	1	Mutual exclusivity
TP53	U2AF1_both	2838	317	4	0	<-3	1	1	Mutual exclusivity
ZRSR2	U2AF1_other	2999	148	12	0	<-3	1	1	Mutual exclusivity
RUNX1	U2AF1_both	2812	343	4	0	<-3	1	1	Mutual exclusivity
U2AF2	U2AF1_other	3126	21	12	0	<-3	1	1	Mutual exclusivity
JAK2	FLT3	3053	72	34	0	<-3	1	1	Mutual exclusivity
IDH2	U2AF2	3001	137	21	0	<-3	1	1	Mutual exclusivity
IDH1	U2AF1_other	3068	79	12	0	<-3	1	1	Mutual exclusivity
ZRSR2	U2AF1_both	3007	148	4	0	<-3	1	1	Mutual exclusivity
NPM1	GNAS	3080	30	49	0	<-3	1	1	Mutual exclusivity
WT1	U2AF1_other	3102	45	12	0	<-3	1	1	Mutual exclusivity
PHF6	U2AF1_both	3052	103	4	0	<-3	1	1	Mutual exclusivity
U2AF1_R156_Q157	JAK2	2953	134	69	3	-0.062	1	1	Mutual exclusivity
ETV6	U2AF1_other	3089	58	12	0	<-3	1	1	Mutual exclusivity
U2AF1_both	BRAF	3146	4	9	0	<-3	1	1	Mutual exclusivity
GATA2	GNAS	3072	38	49	0	<-3	1	1	Mutual exclusivity
ZRSR2	CEBPA	2958	146	53	2	-0.387	1	1	Mutual exclusivity
EZH2	U2AF1_both	2978	177	4	0	<-3	1	1	Mutual exclusivity
GATA2	CEBPA	3066	38	55	0	<-3	1	1	Mutual exclusivity
IDH1	BRAF	3071	79	9	0	<-3	1	1	Mutual exclusivity
KIT	CEBPA	3079	25	55	0	<-3	1	1	Mutual exclusivity
U2AF1_S34	KRAS	2999	117	42	1	-0.712	1	1	Mutual exclusivity
TET2	U2AF1_both	2349	806	3	1	-0.042	1	1	Mutual exclusivity
PHF6	U2AF1_other	3044	103	12	0	<-3	1	1	Mutual exclusivity
GNAS	CEBPA	3055	49	55	0	<-3	1	1	Mutual exclusivity
GNAS	BRAF	3101	49	9	0	<-3	1	1	Mutual exclusivity
TET2	WT1	2318	796	34	11	-0.086	1	1	Mutual exclusivity
CBL	CEBPA	2991	113	53	2	-0.002	1	1	Mutual exclusivity
BCOR	KRAS	2961	155	41	2	-0.102	1	1	Mutual exclusivity
U2AF2	PTPN11	3097	21	41	0	<-3	1	1	Mutual exclusivity
ETV6	CEBPA	3047	57	54	1	-0.015	1	1	Mutual exclusivity
ETV6	NPM1	3071	58	30	0	<-3	1	1	Mutual exclusivity
DNMT3A	PTPN11	2651	467	35	6	-0.039	1	1	Mutual exclusivity
JAK2	U2AF1_both	3083	72	4	0	<-3	1	1	Mutual exclusivity
WT1	U2AF2	3093	45	21	0	<-3	1	1	Mutual exclusivity
U2AF1_S34	U2AF2	3020	118	21	0	<-3	1	1	Mutual exclusivity
ZRSR2	FLT3	2978	147	33	1	-0.704	1	1	Mutual exclusivity
WT1	GNAS	3065	45	49	0	<-3	1	1	Mutual exclusivity
STAG2	WT1	2861	253	42	3	-0.308	1	1	Mutual exclusivity
FLT3	GNAS	3076	34	49	0	<-3	1	1	Mutual exclusivity
NPM1	STAG2	2875	28	254	2	-0.307	1	1	Mutual exclusivity
U2AF1_S34	JAK2	2971	116	70	2	-0.451	1	1	Mutual exclusivity
U2AF1_S34	NPM1	3012	117	29	1	-0.172	1	1	Mutual exclusivity
BCOR	U2AF1_both	2998	157	4	0	<-3	1	1	Mutual exclusivity
IDH1	GATA2	3042	79	38	0	<-3	1	1	Mutual exclusivity
U2AF1_S34	WT1	2997	117	44	1	-0.78	1	1	Mutual exclusivity
U2AF1_S34	U2AF1_other	3029	118	12	0	<-3	1	1	Mutual exclusivity
PHF6	NPM1	3027	102	29	1	0.033	1	1	Co-occurrence
U2AF1_S34	GNAS	2993	117	48	1	-0.908	1	1	Mutual exclusivity
JAK2	PTPN11	3046	72	41	0	<-3	1	1	Mutual exclusivity
WT1	BCOR	2959	43	155	2	-0.171	1	1	Mutual exclusivity
U2AF1_S34	U2AF1_both	3037	118	4	0	<-3	1	1	Mutual exclusivity
NPM1	U2AF2	3108	30	21	0	<-3	1	1	Mutual exclusivity
PHF6	CEBPA	3002	102	54	1	-0.876	1	1	Mutual exclusivity
JAK2	U2AF2	3066	72	21	0	<-3	1	1	Mutual exclusivity
ETV6	U2AF1_both	3097	58	4	0	<-3	1	1	Mutual exclusivity
CBL	GATA2	3007	114	37	1	-0.488	1	1	Mutual exclusivity
IDH1	PTPN11	3040	78	40	1	-0.037	1	1	Mutual exclusivity
JAK2	GNAS	3039	71	48	1	-0.165	1	1	Mutual exclusivity
IDH1	U2AF2	3059	79	21	0	<-3	1	1	Mutual exclusivity
ZRSR2	PTPN11	2971	147	40	1	-0.985	1	1	Mutual exclusivity
ZRSR2	U2AF2	2991	147	20	1	0.025	1	1	Co-occurrence
CBL	U2AF2	3023	115	21	0	<-3	1	1	Mutual exclusivity
IDH1	CBL	2967	77	113	2	-0.552	1	1	Mutual exclusivity
NF1	U2AF2	3045	93	21	0	<-3	1	1	Mutual exclusivity
CEBPA	PTPN11	3063	55	41	0	<-3	1	1	Mutual exclusivity
U2AF1_both	U2AF2	3134	4	21	0	<-3	1	1	Mutual exclusivity
FLT3	U2AF2	3104	34	21	0	<-3	1	1	Mutual exclusivity
CBL	GNAS	2996	114	48	1	-0.869	1	1	Mutual exclusivity
NRAS	JAK2	2998	89	70	2	-0.055	1	1	Mutual exclusivity
PHF6	U2AF2	3035	103	21	0	<-3	1	1	Mutual exclusivity
IDH1	CEBPA	3026	78	54	1	-0.477	1	1	Mutual exclusivity
U2AF1_R156_Q157	WT1	2979	135	43	2	0.038	1	1	Co-occurrence
IDH2	WT1	2979	135	43	2	0.038	1	1	Co-occurrence
NF1	CEBPA	3012	92	54	1	-0.722	1	1	Mutual exclusivity
NPM1	SRSF2	2706	26	423	4	-0.023	1	1	Mutual exclusivity

## Sheet: CMML
A	B	Neither	A Not B	B Not A	Both	Log2 Odds Ratio	p-Value	q-Value	Tendency
SRSF2	SF3B1	242	140	46	2	<-3	<0.001	<0.001	Mutual exclusivity
SRSF2	TET2	139	36	149	106	1.458	<0.001	0.002	Co-occurrence
RUNX1	ASXL1	272	26	99	33	1.802	<0.001	0.002	Co-occurrence
SRSF2	ZRSR2	245	139	43	3	<-3	<0.001	0.002	Mutual exclusivity
STAG2	BCOR	406	10	9	5	>3	<0.001	0.004	Co-occurrence
ASXL1	U2AF2	297	123	1	9	>3	<0.001	0.013	Co-occurrence
DNMT3A	NPM1	394	27	4	5	>3	<0.001	0.013	Co-occurrence
TET2	NPM1	166	255	9	0	<-3	<0.001	0.018	Mutual exclusivity
DNMT3A	U2AF1_S34	396	28	2	4	>3	<0.001	0.02	Co-occurrence
DNMT3A	CEBPA	398	29	0	3	>3	<0.001	0.02	Co-occurrence
EZH2	ASXL1	287	11	114	18	2.043	<0.001	0.026	Co-occurrence
TET2	ASXL1	105	193	70	62	-1.053	<0.001	0.028	Mutual exclusivity
TET2	ZRSR2	167	217	8	38	1.87	<0.001	0.028	Co-occurrence
EZH2	PTPN11	392	24	9	5	>3	0.001	0.049	Co-occurrence
SRSF2	EZH2	261	140	27	2	-2.856	0.002	0.054	Mutual exclusivity
ZRSR2	EZH2	364	37	20	9	2.146	0.002	0.054	Co-occurrence
EZH2	STAG2	391	24	10	5	>3	0.002	0.057	Co-occurrence
NPM1	PTPN11	410	6	11	3	>3	0.002	0.061	Co-occurrence
TET2	TP53	164	253	11	2	<-3	0.002	0.065	Mutual exclusivity
ASXL1	U2AF1_R156_Q157	291	120	7	12	2.056	0.004	0.096	Co-occurrence
ASXL1	NRAS	275	109	23	23	1.335	0.004	0.097	Co-occurrence
TET2	PHF6	172	235	3	20	2.287	0.004	0.107	Co-occurrence
TET2	IDH2	162	250	13	5	-2.004	0.007	0.152	Mutual exclusivity
SRSF2	RUNX1	258	113	30	29	1.142	0.007	0.152	Co-occurrence
ASXL1	IDH2	291	121	7	11	1.918	0.007	0.157	Co-occurrence
EZH2	RUNX1	351	20	50	9	1.659	0.01	0.196	Co-occurrence
SRSF2	DNMT3A	260	138	28	4	-1.894	0.01	0.196	Mutual exclusivity
TET2	JAK2	174	242	1	13	>3	0.01	0.196	Co-occurrence
SF3B1	ASXL1	257	41	125	7	-1.51	0.012	0.211	Mutual exclusivity
PHF6	KRAS	363	16	44	7	1.852	0.012	0.211	Co-occurrence
TET2	CBL	161	213	14	42	1.181	0.013	0.216	Co-occurrence
BCOR	U2AF1_S34	412	12	4	2	>3	0.014	0.223	Co-occurrence
TET2	DNMT3A	155	243	20	12	-1.386	0.014	0.223	Mutual exclusivity
TET2	RUNX1	142	229	33	26	-1.033	0.015	0.226	Mutual exclusivity
DNMT3A	BCOR	388	28	10	4	2.471	0.015	0.226	Co-occurrence
TET2	U2AF1_R156_Q157	162	249	13	6	-1.736	0.016	0.233	Mutual exclusivity
IDH2	BCOR	401	15	11	3	2.866	0.017	0.233	Co-occurrence
DNMT3A	SF3B1	358	24	40	8	1.577	0.017	0.233	Co-occurrence
TET2	U2AF2	167	253	8	2	-2.599	0.018	0.233	Mutual exclusivity
NRAS	U2AF1_S34	381	43	3	3	>3	0.018	0.233	Co-occurrence
CBL	NRAS	329	55	45	1	-2.911	0.018	0.233	Mutual exclusivity
WT1	U2AF1_other	425	3	1	1	>3	0.019	0.233	Co-occurrence
STAG2	ASXL1	292	6	123	9	1.832	0.02	0.243	Co-occurrence
RUNX1	NRAS	337	47	34	12	1.34	0.02	0.244	Co-occurrence
NF1	U2AF2	395	25	7	3	2.759	0.022	0.256	Co-occurrence
KRAS	U2AF1_S34	376	48	3	3	2.97	0.024	0.277	Co-occurrence
BRAF	JAK2	410	6	12	2	>3	0.025	0.277	Co-occurrence
DNMT3A	ASXL1	270	28	128	4	-1.731	0.027	0.285	Mutual exclusivity
TET2	GATA2	171	255	4	0	<-3	0.027	0.285	Mutual exclusivity
ASXL1	ETV6	295	126	3	6	2.227	0.027	0.285	Co-occurrence
DNMT3A	GATA2	396	30	2	2	>3	0.029	0.3	Co-occurrence
SF3B1	KRAS	332	47	50	1	-2.823	0.03	0.3	Mutual exclusivity
RUNX1	PTPN11	362	54	9	5	1.897	0.031	0.304	Co-occurrence
PTPN11	ETV6	409	12	7	2	>3	0.031	0.304	Co-occurrence
EZH2	U2AF1_R156_Q157	386	25	15	4	2.042	0.032	0.305	Co-occurrence
ASXL1	NF1	284	118	14	14	1.267	0.032	0.305	Co-occurrence
SRSF2	NPM1	279	142	9	0	<-3	0.033	0.308	Mutual exclusivity
ZRSR2	DNMT3A	352	46	32	0	<-3	0.037	0.33	Mutual exclusivity
DNMT3A	IDH2	384	28	14	4	1.97	0.037	0.33	Co-occurrence
EZH2	CBL	353	21	48	8	1.486	0.039	0.341	Co-occurrence
ETV6	U2AF1_other	420	8	1	1	>3	0.041	0.357	Co-occurrence
SRSF2	GNAS	287	138	1	4	>3	0.043	0.357	Co-occurrence
TET2	U2AF1_S34	170	254	5	1	-2.901	0.043	0.357	Mutual exclusivity
SRSF2	U2AF1_R156_Q157	271	140	17	2	-2.135	0.043	0.357	Mutual exclusivity
NRAS	KRAS	343	36	41	10	1.217	0.049	0.397	Co-occurrence
NRAS	PTPN11	374	42	10	4	1.833	0.052	0.406	Co-occurrence
ZRSR2	BCOR	374	42	10	4	1.833	0.052	0.406	Co-occurrence
GATA2	U2AF1_S34	421	3	5	1	>3	0.055	0.425	Co-occurrence
NF1	PTPN11	391	25	11	3	2.093	0.055	0.425	Co-occurrence
NRAS	GATA2	382	44	2	2	>3	0.058	0.441	Co-occurrence
SRSF2	NF1	274	128	14	14	1.098	0.061	0.452	Co-occurrence
TP53	BCOR	405	11	12	2	2.617	0.063	0.459	Co-occurrence
DNMT3A	TP53	388	29	10	3	2.005	0.064	0.461	Co-occurrence
STAG2	NRAS	373	11	42	4	1.691	0.065	0.461	Co-occurrence
EZH2	KRAS	357	22	44	7	1.368	0.065	0.461	Co-occurrence
SRSF2	CBL	257	117	31	25	0.825	0.067	0.462	Co-occurrence
SRSF2	IDH2	280	132	8	10	1.407	0.069	0.476	Co-occurrence
ASXL1	TP53	286	131	12	1	-2.459	0.074	0.496	Mutual exclusivity
CBL	NF1	353	49	21	7	1.264	0.074	0.496	Co-occurrence
NPM1	FLT3	418	8	3	1	>3	0.081	0.531	Co-occurrence
NPM1	WT1	418	8	3	1	>3	0.081	0.531	Co-occurrence
STAG2	KRAS	368	11	47	4	1.51	0.089	0.573	Co-occurrence
BRAF	KIT	418	7	4	1	>3	0.09	0.573	Co-occurrence
RUNX1	GATA2	369	57	2	2	2.695	0.093	0.581	Co-occurrence
BRAF	EZH2	395	6	27	2	2.286	0.095	0.593	Co-occurrence
SF3B1	KIT	379	46	3	2	2.458	0.098	0.596	Co-occurrence
IDH2	TP53	401	16	11	2	2.188	0.098	0.596	Co-occurrence
NPM1	KIT	417	8	4	1	>3	0.101	0.604	Co-occurrence
DNMT3A	CBL	343	31	55	1	-2.313	0.102	0.604	Mutual exclusivity
PHF6	U2AF1_other	406	22	1	1	>3	0.104	0.612	Co-occurrence
NF1	ETV6	395	26	7	2	2.118	0.111	0.643	Co-occurrence
RUNX1	ETV6	365	56	6	3	1.704	0.113	0.646	Co-occurrence
SRSF2	ASXL1	207	91	81	51	0.518	0.119	0.678	Co-occurrence
PTPN11	WT1	413	13	3	1	>3	0.124	0.692	Co-occurrence
PTPN11	GATA2	413	13	3	1	>3	0.124	0.692	Co-occurrence
STAG2	IDH2	399	13	16	2	1.94	0.126	0.692	Co-occurrence
NRAS	U2AF1_R156_Q157	369	42	15	4	1.228	0.134	0.728	Co-occurrence
RUNX1	STAG2	360	55	11	4	1.251	0.136	0.734	Co-occurrence
ASXL1	PTPN11	291	125	7	7	1.219	0.14	0.747	Co-occurrence
CBL	IDH2	356	56	18	0	<-3	0.147	0.763	Mutual exclusivity
SF3B1	U2AF1_R156_Q157	363	48	19	0	<-3	0.149	0.763	Mutual exclusivity
DNMT3A	EZH2	369	32	29	0	<-3	0.152	0.763	Mutual exclusivity
JAK2	GNAS	412	13	4	1	2.986	0.153	0.763	Co-occurrence
JAK2	KIT	412	13	4	1	2.986	0.153	0.763	Co-occurrence
PTPN11	KIT	412	13	4	1	2.986	0.153	0.763	Co-occurrence
SRSF2	KRAS	249	130	39	12	-0.763	0.153	0.763	Mutual exclusivity
DNMT3A	KRAS	348	31	50	1	-2.155	0.155	0.763	Mutual exclusivity
BRAF	ETV6	414	7	8	1	2.886	0.157	0.767	Co-occurrence
CBL	ASXL1	264	34	110	22	0.635	0.162	0.783	Co-occurrence
U2AF1_R156_Q157	GATA2	408	18	3	1	2.918	0.166	0.796	Co-occurrence
TET2	ETV6	169	252	6	3	-1.576	0.168	0.799	Mutual exclusivity
TET2	KRAS	159	220	16	35	0.661	0.173	0.806	Co-occurrence
ZRSR2	RUNX1	328	43	56	3	-1.291	0.174	0.806	Mutual exclusivity
SF3B1	CBL	329	45	53	3	-1.273	0.174	0.806	Mutual exclusivity
SRSF2	U2AF2	279	141	9	1	-2.185	0.176	0.808	Mutual exclusivity
NRAS	BCOR	373	43	11	3	1.242	0.18	0.82	Co-occurrence
SRSF2	U2AF1_S34	282	142	6	0	<-3	0.184	0.832	Mutual exclusivity
IDH2	GNAS	408	17	4	1	2.585	0.193	0.865	Co-occurrence
PHF6	FLT3	404	22	3	1	2.614	0.198	0.879	Co-occurrence
BRAF	ZRSR2	378	6	44	2	1.518	0.207	0.903	Co-occurrence
JAK2	IDH1	410	13	6	1	2.394	0.208	0.903	Co-occurrence
ASXL1	IDH1	295	128	3	4	1.62	0.209	0.903	Co-occurrence
EZH2	NRAS	360	24	41	5	0.871	0.22	0.944	Co-occurrence
KRAS	BCOR	368	48	11	3	1.064	0.224	0.954	Co-occurrence
SRSF2	IDH1	285	138	3	4	1.461	0.226	0.954	Co-occurrence
EZH2	SF3B1	354	28	47	1	-1.894	0.231	0.965	Mutual exclusivity
CBL	PTPN11	360	56	14	0	<-3	0.232	0.965	Mutual exclusivity
BRAF	PTPN11	409	7	13	1	2.168	0.234	0.965	Co-occurrence
SRSF2	TP53	277	140	11	2	-1.475	0.236	0.965	Mutual exclusivity
EZH2	BCOR	389	27	12	2	1.264	0.242	0.974	Co-occurrence
BRAF	KRAS	373	6	49	2	1.343	0.243	0.974	Co-occurrence
NPM1	TP53	409	8	12	1	2.091	0.243	0.974	Co-occurrence
SRSF2	JAK2	281	135	7	7	1.058	0.246	0.975	Co-occurrence
DNMT3A	NF1	370	32	28	0	<-3	0.252	0.991	Mutual exclusivity
RUNX1	U2AF1_other	370	58	1	1	2.673	0.256	1	Co-occurrence
DNMT3A	FLT3	395	31	3	1	2.087	0.267	1	Co-occurrence
TET2	PTPN11	167	249	8	6	-0.991	0.269	1	Mutual exclusivity
U2AF1_R156_Q157	IDH1	405	18	6	1	1.907	0.273	1	Co-occurrence
TET2	CEBPA	175	252	0	3	>3	0.274	1	Co-occurrence
STAG2	ETV6	407	14	8	1	1.862	0.276	1	Co-occurrence
RUNX1	KRAS	324	55	47	4	-0.996	0.277	1	Mutual exclusivity
RUNX1	IDH2	357	55	14	4	0.891	0.29	1	Co-occurrence
NRAS	U2AF2	376	44	8	2	1.095	0.291	1	Co-occurrence
CBL	U2AF1_R156_Q157	359	52	15	4	0.881	0.291	1	Co-occurrence
TET2	STAG2	171	244	4	11	0.947	0.298	1	Co-occurrence
SF3B1	CEBPA	380	47	2	1	2.015	0.3	1	Co-occurrence
STAG2	U2AF2	406	14	9	1	1.688	0.302	1	Co-occurrence
BRAF	RUNX1	365	6	57	2	1.094	0.302	1	Co-occurrence
SRSF2	FLT3	284	142	4	0	<-3	0.307	1	Mutual exclusivity
TET2	FLT3	172	254	3	1	-2.147	0.309	1	Mutual exclusivity
ZRSR2	ASXL1	263	35	121	11	-0.55	0.316	1	Mutual exclusivity
DNMT3A	GNAS	394	31	4	1	1.668	0.322	1	Co-occurrence
DNMT3A	KIT	394	31	4	1	1.668	0.322	1	Co-occurrence
TET2	NF1	161	241	14	14	-0.582	0.324	1	Mutual exclusivity
NPM1	U2AF1_R156_Q157	403	8	18	1	1.485	0.337	1	Co-occurrence
U2AF1_R156_Q157	ETV6	403	18	8	1	1.485	0.337	1	Co-occurrence
SF3B1	NF1	355	47	27	1	-1.838	0.346	1	Mutual exclusivity
PTPN11	TP53	404	13	12	1	1.373	0.354	1	Co-occurrence
ZRSR2	CBL	336	38	48	8	0.559	0.355	1	Co-occurrence
NF1	U2AF1_R156_Q157	385	26	17	2	0.801	0.355	1	Co-occurrence
ZRSR2	FLT3	381	45	3	1	1.497	0.365	1	Co-occurrence
U2AF1_R156_Q157	U2AF2	402	18	9	1	1.311	0.367	1	Co-occurrence
SF3B1	RUNX1	327	44	55	4	-0.888	0.372	1	Mutual exclusivity
STAG2	TP53	403	14	12	1	1.262	0.374	1	Co-occurrence
JAK2	PTPN11	403	13	13	1	1.254	0.375	1	Co-occurrence
JAK2	BCOR	403	13	13	1	1.254	0.375	1	Co-occurrence
PTPN11	BCOR	403	13	13	1	1.254	0.375	1	Co-occurrence
SF3B1	TP53	369	48	13	0	<-3	0.377	1	Mutual exclusivity
ASXL1	JAK2	290	126	8	6	0.788	0.378	1	Co-occurrence
SF3B1	GATA2	379	47	3	1	1.427	0.378	1	Co-occurrence
NRAS	JAK2	370	46	14	0	<-3	0.38	1	Mutual exclusivity
SF3B1	JAK2	368	48	14	0	<-3	0.383	1	Mutual exclusivity
SF3B1	PTPN11	368	48	14	0	<-3	0.383	1	Mutual exclusivity
EZH2	IDH1	395	28	6	1	1.233	0.389	1	Co-occurrence
KRAS	JAK2	365	51	14	0	<-3	0.39	1	Mutual exclusivity
CBL	TP53	361	56	13	0	<-3	0.391	1	Mutual exclusivity
PHF6	ETV6	399	22	8	1	1.181	0.393	1	Co-occurrence
STAG2	PTPN11	402	14	13	1	1.143	0.396	1	Co-occurrence
PHF6	DNMT3A	375	23	32	0	<-3	0.401	1	Mutual exclusivity
TET2	KIT	172	253	3	2	-1.142	0.401	1	Mutual exclusivity
CBL	JAK2	363	53	11	3	0.901	0.407	1	Co-occurrence
RUNX1	JAK2	360	56	11	3	0.81	0.421	1	Co-occurrence
RUNX1	BCOR	360	56	11	3	0.81	0.421	1	Co-occurrence
EZH2	NF1	376	26	25	3	0.795	0.423	1	Co-occurrence
ASXL1	KRAS	260	119	38	13	-0.42	0.424	1	Mutual exclusivity
FLT3	RUNX1	368	3	58	1	1.081	0.447	1	Co-occurrence
RUNX1	WT1	368	58	3	1	1.081	0.447	1	Co-occurrence
SF3B1	GNAS	378	47	4	1	1.008	0.448	1	Co-occurrence
U2AF1_R156_Q157	TP53	399	18	12	1	0.885	0.449	1	Co-occurrence
TET2	IDH1	171	252	4	3	-0.974	0.45	1	Mutual exclusivity
ZRSR2	SF3B1	339	43	45	3	-0.928	0.455	1	Mutual exclusivity
NPM1	NF1	394	8	27	1	0.867	0.458	1	Co-occurrence
NPM1	EZH2	393	8	28	1	0.811	0.47	1	Co-occurrence
EZH2	ETV6	393	28	8	1	0.811	0.47	1	Co-occurrence
BRAF	TET2	173	2	249	6	1.06	0.481	1	Co-occurrence
KRAS	U2AF1_R156_Q157	363	48	16	3	0.504	0.482	1	Co-occurrence
PHF6	NRAS	362	22	45	1	-1.451	0.493	1	Mutual exclusivity
PHF6	SF3B1	360	22	47	1	-1.522	0.495	1	Mutual exclusivity
CBL	GNAS	370	55	4	1	0.75	0.504	1	Co-occurrence
CBL	KIT	370	55	4	1	0.75	0.504	1	Co-occurrence
DNMT3A	ETV6	390	31	8	1	0.653	0.505	1	Co-occurrence
CBL	KRAS	331	48	43	8	0.359	0.511	1	Co-occurrence
ASXL1	U2AF1_other	297	131	1	1	1.181	0.52	1	Co-occurrence
RUNX1	KIT	367	58	4	1	0.662	0.524	1	Co-occurrence
PHF6	JAK2	394	22	13	1	0.462	0.542	1	Co-occurrence
SRSF2	U2AF1_other	287	141	1	1	1.025	0.552	1	Co-occurrence
SRSF2	CEBPA	285	142	3	0	<-3	0.554	1	Mutual exclusivity
ASXL1	CEBPA	295	132	3	0	<-3	0.556	1	Mutual exclusivity
SRSF2	BCOR	277	139	11	3	-0.88	0.564	1	Mutual exclusivity
IDH2	U2AF1_R156_Q157	394	17	18	1	0.365	0.564	1	Co-occurrence
ASXL1	BCOR	287	129	11	3	-0.721	0.565	1	Mutual exclusivity
RUNX1	NF1	348	54	23	5	0.486	0.567	1	Co-occurrence
TET2	BCOR	168	248	7	7	-0.562	0.582	1	Mutual exclusivity
NF1	TP53	390	27	12	1	0.267	0.589	1	Co-occurrence
ASXL1	GATA2	296	130	2	2	1.187	0.59	1	Co-occurrence
RUNX1	U2AF1_S34	366	58	5	1	0.336	0.59	1	Co-occurrence
BRAF	NRAS	377	7	45	1	0.259	0.599	1	Co-occurrence
SRSF2	GATA2	286	140	2	2	1.031	0.602	1	Co-occurrence
EZH2	TP53	389	28	12	1	0.211	0.602	1	Co-occurrence
NPM1	SF3B1	373	9	48	0	<-3	0.606	1	Mutual exclusivity
ZRSR2	NPM1	375	46	9	0	<-3	0.606	1	Mutual exclusivity
ZRSR2	ETV6	375	46	9	0	<-3	0.606	1	Mutual exclusivity
NPM1	KRAS	370	9	51	0	<-3	0.607	1	Mutual exclusivity
KRAS	ETV6	370	51	9	0	<-3	0.607	1	Mutual exclusivity
ZRSR2	U2AF2	374	46	10	0	<-3	0.609	1	Mutual exclusivity
SF3B1	U2AF2	372	48	10	0	<-3	0.611	1	Mutual exclusivity
STAG2	NF1	387	15	28	0	<-3	0.613	1	Mutual exclusivity
DNMT3A	JAK2	384	32	14	0	<-3	0.613	1	Mutual exclusivity
NPM1	CBL	365	9	56	0	<-3	0.613	1	Mutual exclusivity
CBL	ETV6	365	56	9	0	<-3	0.613	1	Mutual exclusivity
NF1	BCOR	388	28	14	0	<-3	0.613	1	Mutual exclusivity
PHF6	U2AF1_R156_Q157	388	23	19	0	<-3	0.614	1	Mutual exclusivity
KRAS	U2AF2	369	51	10	0	<-3	0.616	1	Mutual exclusivity
EZH2	IDH2	383	29	18	0	<-3	0.623	1	Mutual exclusivity
RUNX1	U2AF2	363	57	8	2	0.671	0.634	1	Co-occurrence
NRAS	TP53	373	44	11	2	0.624	0.639	1	Co-occurrence
SRSF2	PHF6	271	136	17	6	-0.508	0.649	1	Mutual exclusivity
TET2	GNAS	174	251	1	4	1.471	0.653	1	Co-occurrence
ZRSR2	PTPN11	372	44	12	2	0.495	0.653	1	Co-occurrence
SF3B1	BCOR	370	46	12	2	0.423	0.662	1	Co-occurrence
PHF6	EZH2	380	21	27	2	0.423	0.662	1	Co-occurrence
ZRSR2	STAG2	371	44	13	2	0.375	0.668	1	Co-occurrence
ASXL1	U2AF1_S34	293	131	5	1	-1.161	0.672	1	Mutual exclusivity
CBL	BCOR	362	54	12	2	0.16	0.702	1	Co-occurrence
STAG2	CBL	360	14	55	1	-1.097	0.704	1	Mutual exclusivity
IDH2	NRAS	367	17	45	1	-1.06	0.707	1	Mutual exclusivity
ZRSR2	IDH2	367	45	17	1	-1.06	0.707	1	Mutual exclusivity
ZRSR2	U2AF1_R156_Q157	366	45	18	1	-1.146	0.708	1	Mutual exclusivity
IDH2	KRAS	362	17	50	1	-1.231	0.709	1	Mutual exclusivity
BRAF	SRSF2	283	5	139	3	0.289	0.723	1	Co-occurrence
ZRSR2	PHF6	364	43	20	3	0.345	0.726	1	Co-occurrence
NPM1	ASXL1	291	7	130	2	-0.645	0.728	1	Mutual exclusivity
RUNX1	U2AF1_R156_Q157	355	56	16	3	0.249	0.734	1	Co-occurrence
SRSF2	NRAS	256	128	32	14	-0.193	0.743	1	Mutual exclusivity
PHF6	CBL	353	21	54	2	-0.684	0.753	1	Mutual exclusivity
ZRSR2	NF1	358	44	26	2	-0.676	0.755	1	Mutual exclusivity
NRAS	NF1	358	44	26	2	-0.676	0.755	1	Mutual exclusivity
KRAS	NF1	355	47	24	4	0.332	0.76	1	Co-occurrence
ZRSR2	NRAS	342	42	42	4	-0.367	0.803	1	Mutual exclusivity
SF3B1	NRAS	340	44	42	4	-0.442	0.804	1	Mutual exclusivity
PHF6	ASXL1	281	17	126	6	-0.345	0.817	1	Mutual exclusivity
TET2	EZH2	164	237	11	18	0.179	0.846	1	Co-occurrence
TET2	NRAS	157	227	18	28	0.106	0.875	1	Co-occurrence
FLT3	STAG2	411	4	15	0	<-3	1	1	Mutual exclusivity
PTPN11	GNAS	411	14	5	0	<-3	1	1	Mutual exclusivity
GNAS	BCOR	411	5	14	0	<-3	1	1	Mutual exclusivity
BCOR	KIT	411	14	5	0	<-3	1	1	Mutual exclusivity
ZRSR2	KRAS	338	41	46	5	-0.158	1	1	Mutual exclusivity
DNMT3A	NRAS	355	29	43	3	-0.228	1	1	Mutual exclusivity
CEBPA	JAK2	413	3	14	0	<-3	1	1	Mutual exclusivity
CEBPA	PTPN11	413	3	14	0	<-3	1	1	Mutual exclusivity
CEBPA	BCOR	413	3	14	0	<-3	1	1	Mutual exclusivity
U2AF2	BCOR	406	10	14	0	<-3	1	1	Mutual exclusivity
CEBPA	GNAS	422	3	5	0	<-3	1	1	Mutual exclusivity
CEBPA	KIT	422	3	5	0	<-3	1	1	Mutual exclusivity
DNMT3A	RUNX1	343	28	55	4	-0.167	1	1	Mutual exclusivity
U2AF1_S34	U2AF1_other	422	6	2	0	<-3	1	1	Mutual exclusivity
NPM1	JAK2	407	9	14	0	<-3	1	1	Mutual exclusivity
NPM1	BCOR	407	9	14	0	<-3	1	1	Mutual exclusivity
TP53	U2AF1_S34	411	13	6	0	<-3	1	1	Mutual exclusivity
CEBPA	U2AF1_S34	421	3	6	0	<-3	1	1	Mutual exclusivity
DNMT3A	PTPN11	385	31	13	1	-0.066	1	1	Mutual exclusivity
BRAF	BCOR	408	8	14	0	<-3	1	1	Mutual exclusivity
FLT3	U2AF1_other	424	4	2	0	<-3	1	1	Mutual exclusivity
GATA2	U2AF1_other	424	4	2	0	<-3	1	1	Mutual exclusivity
SF3B1	IDH1	375	48	7	0	<-3	1	1	Mutual exclusivity
EZH2	U2AF1_other	399	29	2	0	<-3	1	1	Mutual exclusivity
SF3B1	STAG2	368	47	14	1	-0.838	1	1	Mutual exclusivity
STAG2	IDH1	408	15	7	0	<-3	1	1	Mutual exclusivity
STAG2	WT1	411	15	4	0	<-3	1	1	Mutual exclusivity
STAG2	GATA2	411	15	4	0	<-3	1	1	Mutual exclusivity
FLT3	JAK2	412	4	14	0	<-3	1	1	Mutual exclusivity
FLT3	PTPN11	412	4	14	0	<-3	1	1	Mutual exclusivity
FLT3	BCOR	412	4	14	0	<-3	1	1	Mutual exclusivity
ZRSR2	JAK2	371	45	13	1	-0.657	1	1	Mutual exclusivity
IDH2	U2AF1_S34	406	18	6	0	<-3	1	1	Mutual exclusivity
BRAF	STAG2	407	8	15	0	<-3	1	1	Mutual exclusivity
EZH2	CEBPA	398	29	3	0	<-3	1	1	Mutual exclusivity
RUNX1	CBL	322	52	49	7	-0.177	1	1	Mutual exclusivity
FLT3	TP53	413	4	13	0	<-3	1	1	Mutual exclusivity
KRAS	TP53	367	50	12	1	-0.709	1	1	Mutual exclusivity
STAG2	JAK2	401	15	14	0	<-3	1	1	Mutual exclusivity
TP53	ETV6	408	13	9	0	<-3	1	1	Mutual exclusivity
ZRSR2	GNAS	379	46	5	0	<-3	1	1	Mutual exclusivity
NRAS	GNAS	379	46	5	0	<-3	1	1	Mutual exclusivity
ZRSR2	KIT	379	46	5	0	<-3	1	1	Mutual exclusivity
NRAS	KIT	379	46	5	0	<-3	1	1	Mutual exclusivity
FLT3	ASXL1	295	3	131	1	-0.414	1	1	Mutual exclusivity
ZRSR2	U2AF1_S34	378	46	6	0	<-3	1	1	Mutual exclusivity
U2AF2	ETV6	411	10	9	0	<-3	1	1	Mutual exclusivity
ZRSR2	CEBPA	381	46	3	0	<-3	1	1	Mutual exclusivity
NRAS	CEBPA	381	46	3	0	<-3	1	1	Mutual exclusivity
PHF6	GNAS	402	23	5	0	<-3	1	1	Mutual exclusivity
PHF6	KIT	402	23	5	0	<-3	1	1	Mutual exclusivity
SF3B1	U2AF1_other	380	48	2	0	<-3	1	1	Mutual exclusivity
NPM1	NRAS	376	8	45	1	0.063	1	1	Co-occurrence
NRAS	ETV6	376	45	8	1	0.063	1	1	Co-occurrence
FLT3	CEBPA	423	4	3	0	<-3	1	1	Mutual exclusivity
EZH2	JAK2	388	28	13	1	0.092	1	1	Co-occurrence
ZRSR2	TP53	372	45	12	1	-0.538	1	1	Mutual exclusivity
JAK2	U2AF1_S34	410	14	6	0	<-3	1	1	Mutual exclusivity
PTPN11	U2AF1_S34	410	14	6	0	<-3	1	1	Mutual exclusivity
PHF6	STAG2	392	23	15	0	<-3	1	1	Mutual exclusivity
ZRSR2	IDH1	377	46	7	0	<-3	1	1	Mutual exclusivity
NRAS	IDH1	377	46	7	0	<-3	1	1	Mutual exclusivity
NPM1	STAG2	406	9	15	0	<-3	1	1	Mutual exclusivity
PHF6	WT1	403	23	4	0	<-3	1	1	Mutual exclusivity
PHF6	GATA2	403	23	4	0	<-3	1	1	Mutual exclusivity
STAG2	GNAS	410	15	5	0	<-3	1	1	Mutual exclusivity
STAG2	KIT	410	15	5	0	<-3	1	1	Mutual exclusivity
RUNX1	IDH1	365	58	6	1	0.069	1	1	Co-occurrence
BRAF	GNAS	417	8	5	0	<-3	1	1	Mutual exclusivity
FLT3	WT1	422	4	4	0	<-3	1	1	Mutual exclusivity
FLT3	GATA2	422	4	4	0	<-3	1	1	Mutual exclusivity
WT1	GATA2	422	4	4	0	<-3	1	1	Mutual exclusivity
JAK2	U2AF2	406	14	10	0	<-3	1	1	Mutual exclusivity
PTPN11	U2AF2	406	14	10	0	<-3	1	1	Mutual exclusivity
STAG2	U2AF1_other	413	15	2	0	<-3	1	1	Mutual exclusivity
EZH2	FLT3	397	29	4	0	<-3	1	1	Mutual exclusivity
EZH2	WT1	397	29	4	0	<-3	1	1	Mutual exclusivity
EZH2	GATA2	397	29	4	0	<-3	1	1	Mutual exclusivity
U2AF1_R156_Q157	U2AF1_S34	405	19	6	0	<-3	1	1	Mutual exclusivity
IDH2	JAK2	398	18	14	0	<-3	1	1	Mutual exclusivity
IDH2	PTPN11	398	18	14	0	<-3	1	1	Mutual exclusivity
GNAS	U2AF1_other	423	5	2	0	<-3	1	1	Mutual exclusivity
KIT	U2AF1_other	423	5	2	0	<-3	1	1	Mutual exclusivity
DNMT3A	STAG2	384	31	14	1	-0.177	1	1	Mutual exclusivity
NPM1	CEBPA	418	9	3	0	<-3	1	1	Mutual exclusivity
CEBPA	ETV6	418	3	9	0	<-3	1	1	Mutual exclusivity
PHF6	PTPN11	393	23	14	0	<-3	1	1	Mutual exclusivity
PHF6	BCOR	393	23	14	0	<-3	1	1	Mutual exclusivity
IDH2	KIT	407	18	5	0	<-3	1	1	Mutual exclusivity
ZRSR2	U2AF1_other	382	46	2	0	<-3	1	1	Mutual exclusivity
NRAS	U2AF1_other	382	46	2	0	<-3	1	1	Mutual exclusivity
FLT3	CBL	370	4	56	0	<-3	1	1	Mutual exclusivity
CBL	WT1	370	56	4	0	<-3	1	1	Mutual exclusivity
CBL	GATA2	370	56	4	0	<-3	1	1	Mutual exclusivity
U2AF2	U2AF1_S34	414	10	6	0	<-3	1	1	Mutual exclusivity
SF3B1	FLT3	378	48	4	0	<-3	1	1	Mutual exclusivity
SF3B1	WT1	378	48	4	0	<-3	1	1	Mutual exclusivity
IDH1	U2AF1_S34	417	7	6	0	<-3	1	1	Mutual exclusivity
JAK2	U2AF1_other	414	14	2	0	<-3	1	1	Mutual exclusivity
PTPN11	U2AF1_other	414	14	2	0	<-3	1	1	Mutual exclusivity
BCOR	U2AF1_other	414	14	2	0	<-3	1	1	Mutual exclusivity
CBL	U2AF1_other	372	56	2	0	<-3	1	1	Mutual exclusivity
FLT3	U2AF1_S34	420	4	6	0	<-3	1	1	Mutual exclusivity
WT1	U2AF1_S34	420	4	6	0	<-3	1	1	Mutual exclusivity
PHF6	U2AF1_S34	401	23	6	0	<-3	1	1	Mutual exclusivity
KRAS	GNAS	374	51	5	0	<-3	1	1	Mutual exclusivity
KRAS	KIT	374	51	5	0	<-3	1	1	Mutual exclusivity
ASXL1	WT1	295	131	3	1	-0.414	1	1	Mutual exclusivity
U2AF1_R156_Q157	U2AF1_other	409	19	2	0	<-3	1	1	Mutual exclusivity
TP53	GNAS	412	13	5	0	<-3	1	1	Mutual exclusivity
TP53	KIT	412	13	5	0	<-3	1	1	Mutual exclusivity
GNAS	KIT	420	5	5	0	<-3	1	1	Mutual exclusivity
NPM1	RUNX1	363	8	58	1	-0.354	1	1	Mutual exclusivity
JAK2	ETV6	407	14	9	0	<-3	1	1	Mutual exclusivity
BCOR	ETV6	407	14	9	0	<-3	1	1	Mutual exclusivity
SRSF2	PTPN11	278	138	10	4	-0.312	1	1	Mutual exclusivity
DNMT3A	U2AF1_other	396	32	2	0	<-3	1	1	Mutual exclusivity
CEBPA	U2AF1_other	425	3	2	0	<-3	1	1	Mutual exclusivity
CBL	IDH1	368	55	6	1	0.157	1	1	Co-occurrence
NPM1	GNAS	416	9	5	0	<-3	1	1	Mutual exclusivity
ETV6	KIT	416	9	5	0	<-3	1	1	Mutual exclusivity
IDH2	IDH1	405	18	7	0	<-3	1	1	Mutual exclusivity
STAG2	U2AF1_S34	409	15	6	0	<-3	1	1	Mutual exclusivity
BRAF	SF3B1	375	7	47	1	0.189	1	1	Co-occurrence
PHF6	IDH1	400	23	7	0	<-3	1	1	Mutual exclusivity
SRSF2	WT1	285	141	3	1	-0.57	1	1	Mutual exclusivity
NPM1	U2AF1_S34	415	9	6	0	<-3	1	1	Mutual exclusivity
ETV6	U2AF1_S34	415	9	6	0	<-3	1	1	Mutual exclusivity
STAG2	CEBPA	412	15	3	0	<-3	1	1	Mutual exclusivity
RUNX1	TP53	359	58	12	1	-0.955	1	1	Mutual exclusivity
IDH2	ETV6	403	18	9	0	<-3	1	1	Mutual exclusivity
TET2	SF3B1	156	226	19	29	0.075	1	1	Co-occurrence
CBL	U2AF2	365	55	9	1	-0.44	1	1	Mutual exclusivity
NPM1	IDH1	414	9	7	0	<-3	1	1	Mutual exclusivity
IDH1	ETV6	414	7	9	0	<-3	1	1	Mutual exclusivity
IDH2	U2AF2	402	18	10	0	<-3	1	1	Mutual exclusivity
DNMT3A	U2AF1_R156_Q157	380	31	18	1	-0.554	1	1	Mutual exclusivity
FLT3	GNAS	421	4	5	0	<-3	1	1	Mutual exclusivity
FLT3	KIT	421	4	5	0	<-3	1	1	Mutual exclusivity
WT1	KIT	421	4	5	0	<-3	1	1	Mutual exclusivity
GATA2	KIT	421	4	5	0	<-3	1	1	Mutual exclusivity
PHF6	CEBPA	404	23	3	0	<-3	1	1	Mutual exclusivity
CBL	CEBPA	371	56	3	0	<-3	1	1	Mutual exclusivity
EZH2	GNAS	396	29	5	0	<-3	1	1	Mutual exclusivity
EZH2	KIT	396	29	5	0	<-3	1	1	Mutual exclusivity
FLT3	U2AF2	416	4	10	0	<-3	1	1	Mutual exclusivity
SF3B1	IDH2	366	46	16	2	-0.008	1	1	Mutual exclusivity
SRSF2	STAG2	278	137	10	5	0.021	1	1	Co-occurrence
RUNX1	GNAS	366	59	5	0	<-3	1	1	Mutual exclusivity
SF3B1	U2AF1_S34	376	48	6	0	<-3	1	1	Mutual exclusivity
FLT3	NRAS	380	4	46	0	<-3	1	1	Mutual exclusivity
ZRSR2	WT1	380	46	4	0	<-3	1	1	Mutual exclusivity
NRAS	WT1	380	46	4	0	<-3	1	1	Mutual exclusivity
ZRSR2	GATA2	380	46	4	0	<-3	1	1	Mutual exclusivity
U2AF2	KIT	415	10	5	0	<-3	1	1	Mutual exclusivity
NF1	GNAS	397	28	5	0	<-3	1	1	Mutual exclusivity
NF1	KIT	397	28	5	0	<-3	1	1	Mutual exclusivity
RUNX1	CEBPA	368	59	3	0	<-3	1	1	Mutual exclusivity
NF1	U2AF1_S34	396	28	6	0	<-3	1	1	Mutual exclusivity
NPM1	ETV6	412	9	9	0	<-3	1	1	Mutual exclusivity
KRAS	PTPN11	366	50	13	1	-0.829	1	1	Mutual exclusivity
CEBPA	IDH1	420	3	7	0	<-3	1	1	Mutual exclusivity
JAK2	WT1	412	14	4	0	<-3	1	1	Mutual exclusivity
BCOR	WT1	412	14	4	0	<-3	1	1	Mutual exclusivity
JAK2	GATA2	412	14	4	0	<-3	1	1	Mutual exclusivity
BCOR	GATA2	412	14	4	0	<-3	1	1	Mutual exclusivity
KRAS	U2AF1_other	377	51	2	0	<-3	1	1	Mutual exclusivity
PTPN11	IDH1	409	14	7	0	<-3	1	1	Mutual exclusivity
IDH1	BCOR	409	7	14	0	<-3	1	1	Mutual exclusivity
TET2	WT1	173	253	2	2	-0.548	1	1	Mutual exclusivity
GNAS	U2AF1_S34	419	5	6	0	<-3	1	1	Mutual exclusivity
KIT	U2AF1_S34	419	5	6	0	<-3	1	1	Mutual exclusivity
CEBPA	TP53	414	3	13	0	<-3	1	1	Mutual exclusivity
BRAF	U2AF1_other	420	8	2	0	<-3	1	1	Mutual exclusivity
NPM1	U2AF1_other	419	9	2	0	<-3	1	1	Mutual exclusivity
BRAF	U2AF1_S34	416	8	6	0	<-3	1	1	Mutual exclusivity
EZH2	U2AF2	391	29	10	0	<-3	1	1	Mutual exclusivity
IDH1	U2AF2	413	7	10	0	<-3	1	1	Mutual exclusivity
EZH2	U2AF1_S34	395	29	6	0	<-3	1	1	Mutual exclusivity
NF1	JAK2	389	27	13	1	0.148	1	1	Co-occurrence
PHF6	RUNX1	351	20	56	3	-0.089	1	1	Mutual exclusivity
NF1	CEBPA	399	28	3	0	<-3	1	1	Mutual exclusivity
IDH2	NF1	385	17	27	1	-0.254	1	1	Mutual exclusivity
BRAF	CEBPA	419	8	3	0	<-3	1	1	Mutual exclusivity
TP53	WT1	413	13	4	0	<-3	1	1	Mutual exclusivity
TP53	GATA2	413	13	4	0	<-3	1	1	Mutual exclusivity
CBL	U2AF1_S34	368	56	6	0	<-3	1	1	Mutual exclusivity
IDH2	U2AF1_other	410	18	2	0	<-3	1	1	Mutual exclusivity
SRSF2	ETV6	282	139	6	3	0.021	1	1	Co-occurrence
TET2	U2AF1_other	174	254	1	1	-0.546	1	1	Mutual exclusivity
DNMT3A	U2AF2	388	32	10	0	<-3	1	1	Mutual exclusivity
BRAF	ASXL1	292	6	130	2	-0.418	1	1	Mutual exclusivity
KRAS	CEBPA	376	51	3	0	<-3	1	1	Mutual exclusivity
SRSF2	KIT	284	141	4	1	-0.99	1	1	Mutual exclusivity
FLT3	KRAS	375	4	51	0	<-3	1	1	Mutual exclusivity
KRAS	WT1	375	51	4	0	<-3	1	1	Mutual exclusivity
KRAS	GATA2	375	51	4	0	<-3	1	1	Mutual exclusivity
BRAF	DNMT3A	390	8	32	0	<-3	1	1	Mutual exclusivity
DNMT3A	IDH1	391	32	7	0	<-3	1	1	Mutual exclusivity
CEBPA	U2AF2	417	3	10	0	<-3	1	1	Mutual exclusivity
PHF6	U2AF2	397	23	10	0	<-3	1	1	Mutual exclusivity
NPM1	U2AF2	411	9	10	0	<-3	1	1	Mutual exclusivity
ASXL1	GNAS	294	131	4	1	-0.834	1	1	Mutual exclusivity
ASXL1	KIT	294	131	4	1	-0.834	1	1	Mutual exclusivity
BRAF	CBL	367	7	55	1	-0.069	1	1	Mutual exclusivity
U2AF1_R156_Q157	CEBPA	408	19	3	0	<-3	1	1	Mutual exclusivity
TP53	U2AF2	407	13	10	0	<-3	1	1	Mutual exclusivity
U2AF1_R156_Q157	GNAS	406	19	5	0	<-3	1	1	Mutual exclusivity
U2AF1_R156_Q157	KIT	406	19	5	0	<-3	1	1	Mutual exclusivity
CEBPA	WT1	423	3	4	0	<-3	1	1	Mutual exclusivity
CEBPA	GATA2	423	3	4	0	<-3	1	1	Mutual exclusivity
KRAS	IDH1	372	51	7	0	<-3	1	1	Mutual exclusivity
FLT3	IDH2	408	4	18	0	<-3	1	1	Mutual exclusivity
IDH2	WT1	408	18	4	0	<-3	1	1	Mutual exclusivity
IDH2	GATA2	408	18	4	0	<-3	1	1	Mutual exclusivity
FLT3	IDH1	419	4	7	0	<-3	1	1	Mutual exclusivity
PHF6	TP53	394	23	13	0	<-3	1	1	Mutual exclusivity
IDH1	U2AF1_other	421	7	2	0	<-3	1	1	Mutual exclusivity
SF3B1	ETV6	374	47	8	1	-0.008	1	1	Mutual exclusivity
NF1	U2AF1_other	400	28	2	0	<-3	1	1	Mutual exclusivity
BRAF	U2AF1_R156_Q157	403	8	19	0	<-3	1	1	Mutual exclusivity
NF1	IDH1	395	28	7	0	<-3	1	1	Mutual exclusivity
TP53	IDH1	410	13	7	0	<-3	1	1	Mutual exclusivity
BRAF	U2AF2	412	8	10	0	<-3	1	1	Mutual exclusivity
FLT3	U2AF1_R156_Q157	407	4	19	0	<-3	1	1	Mutual exclusivity
U2AF1_R156_Q157	WT1	407	19	4	0	<-3	1	1	Mutual exclusivity
IDH2	CEBPA	409	18	3	0	<-3	1	1	Mutual exclusivity
U2AF1_R156_Q157	JAK2	397	19	14	0	<-3	1	1	Mutual exclusivity
U2AF1_R156_Q157	PTPN11	397	19	14	0	<-3	1	1	Mutual exclusivity
U2AF1_R156_Q157	BCOR	397	19	14	0	<-3	1	1	Mutual exclusivity
FLT3	NF1	398	4	28	0	<-3	1	1	Mutual exclusivity
BRAF	NF1	394	8	28	0	<-3	1	1	Mutual exclusivity
NF1	WT1	398	28	4	0	<-3	1	1	Mutual exclusivity
NF1	GATA2	398	28	4	0	<-3	1	1	Mutual exclusivity
TP53	U2AF1_other	415	13	2	0	<-3	1	1	Mutual exclusivity
BRAF	TP53	409	8	13	0	<-3	1	1	Mutual exclusivity
PHF6	IDH2	390	22	17	1	0.06	1	1	Co-occurrence
BRAF	IDH1	415	8	7	0	<-3	1	1	Mutual exclusivity
BRAF	PHF6	399	8	23	0	<-3	1	1	Mutual exclusivity
DNMT3A	WT1	394	32	4	0	<-3	1	1	Mutual exclusivity
BRAF	NPM1	413	8	9	0	<-3	1	1	Mutual exclusivity
JAK2	TP53	403	14	13	0	<-3	1	1	Mutual exclusivity
PHF6	NF1	380	22	27	1	-0.644	1	1	Mutual exclusivity
GNAS	ETV6	416	5	9	0	<-3	1	1	Mutual exclusivity
PHF6	NPM1	398	23	9	0	<-3	1	1	Mutual exclusivity
BRAF	IDH2	404	8	18	0	<-3	1	1	Mutual exclusivity
NPM1	IDH2	403	9	18	0	<-3	1	1	Mutual exclusivity
U2AF2	U2AF1_other	418	10	2	0	<-3	1	1	Mutual exclusivity
GNAS	WT1	421	5	4	0	<-3	1	1	Mutual exclusivity
GNAS	GATA2	421	5	4	0	<-3	1	1	Mutual exclusivity
BRAF	FLT3	418	8	4	0	<-3	1	1	Mutual exclusivity
BRAF	WT1	418	8	4	0	<-3	1	1	Mutual exclusivity
BRAF	GATA2	418	8	4	0	<-3	1	1	Mutual exclusivity
U2AF2	WT1	416	10	4	0	<-3	1	1	Mutual exclusivity
U2AF2	GATA2	416	10	4	0	<-3	1	1	Mutual exclusivity
GNAS	U2AF2	415	5	10	0	<-3	1	1	Mutual exclusivity
STAG2	U2AF1_R156_Q157	396	15	19	0	<-3	1	1	Mutual exclusivity
NPM1	GATA2	417	9	4	0	<-3	1	1	Mutual exclusivity
FLT3	ETV6	417	4	9	0	<-3	1	1	Mutual exclusivity
WT1	ETV6	417	4	9	0	<-3	1	1	Mutual exclusivity
GATA2	ETV6	417	4	9	0	<-3	1	1	Mutual exclusivity
IDH1	GNAS	418	7	5	0	<-3	1	1	Mutual exclusivity
IDH1	KIT	418	7	5	0	<-3	1	1	Mutual exclusivity
IDH1	WT1	419	7	4	0	<-3	1	1	Mutual exclusivity
IDH1	GATA2	419	7	4	0	<-3	1	1	Mutual exclusivity

## Sheet: MPN 
A	B	Neither	A Not B	B Not A	Both	Log2 Odds Ratio	p-Value	q-Value	Tendency
JAK2	CALR	316	992	239	4	<-3	<0.001	<0.001	Mutual exclusivity
ASXL1	EZH2	1327	178	13	33	>3	<0.001	<0.001	Co-occurrence
JAK2	MPL	506	990	49	6	<-3	<0.001	<0.001	Mutual exclusivity
ASXL1	SRSF2	1271	163	69	48	2.439	<0.001	<0.001	Co-occurrence
ASXL1	CSF3R	1324	184	16	27	>3	<0.001	<0.001	Co-occurrence
ASXL1	SETBP1	1322	183	18	28	>3	<0.001	<0.001	Co-occurrence
SRSF2	IDH2	1416	97	18	20	>3	<0.001	<0.001	Co-occurrence
SRSF2	SETBP1	1409	96	25	21	>3	<0.001	<0.001	Co-occurrence
ASXL1	U2AF1_R156_Q157	1324	186	16	25	>3	<0.001	<0.001	Co-occurrence
SETBP1	CSF3R	1476	32	29	14	>3	<0.001	<0.001	Co-occurrence
ASXL1	JAK2	441	114	899	97	-1.261	<0.001	<0.001	Mutual exclusivity
JAK2	CSF3R	521	987	34	9	-2.839	<0.001	<0.001	Mutual exclusivity
SRSF2	NRAS	1412	103	22	14	>3	<0.001	<0.001	Co-occurrence
ASXL1	ZRSR2	1325	194	15	17	2.952	<0.001	<0.001	Co-occurrence
ASXL1	NRAS	1322	193	18	18	2.776	<0.001	<0.001	Co-occurrence
SETBP1	JAK2	521	34	984	12	-2.42	<0.001	<0.001	Mutual exclusivity
ASXL1	RUNX1	1306	188	34	23	2.232	<0.001	<0.001	Co-occurrence
JAK2	EZH2	522	983	33	13	-2.257	<0.001	<0.001	Mutual exclusivity
SRSF2	CSF3R	1405	103	29	14	2.719	<0.001	<0.001	Co-occurrence
NRAS	IDH2	1485	28	30	8	>3	<0.001	<0.001	Co-occurrence
ASXL1	TET2	1217	166	123	45	1.423	<0.001	<0.001	Co-occurrence
ASXL1	CBL	1330	198	10	13	>3	<0.001	<0.001	Co-occurrence
RUNX1	IDH1	1477	49	17	8	>3	<0.001	<0.001	Co-occurrence
SRSF2	TET2	1296	87	138	30	1.695	<0.001	<0.001	Co-occurrence
SRSF2	CALR	1194	114	240	3	-2.933	<0.001	<0.001	Mutual exclusivity
SETBP1	PTPN11	1497	41	8	5	>3	<0.001	<0.001	Co-occurrence
CSF3R	EZH2	1470	35	38	8	>3	<0.001	<0.001	Co-occurrence
SETBP1	EZH2	1467	38	38	8	>3	<0.001	<0.001	Co-occurrence
RUNX1	IDH2	1464	49	30	8	2.994	<0.001	<0.001	Co-occurrence
NRAS	SETBP1	1476	29	39	7	>3	<0.001	<0.001	Co-occurrence
MPL	CALR	1253	55	243	0	<-3	<0.001	0.001	Mutual exclusivity
ASXL1	U2AF1_S34	1329	201	11	10	2.588	<0.001	0.002	Co-occurrence
RUNX1	EZH2	1456	49	38	8	2.645	<0.001	0.002	Co-occurrence
SRSF2	RUNX1	1390	104	44	13	1.981	<0.001	0.002	Co-occurrence
ASXL1	CEBPA	1324	200	16	11	2.186	<0.001	0.004	Co-occurrence
NRAS	EZH2	1475	30	40	6	2.883	<0.001	0.004	Co-occurrence
IDH1	EZH2	1485	20	41	5	>3	<0.001	0.006	Co-occurrence
ASXL1	PTPN11	1334	204	6	7	2.932	<0.001	0.006	Co-occurrence
ASXL1	IDH1	1325	201	15	10	2.136	<0.001	0.007	Co-occurrence
TET2	NRAS	1358	157	25	11	1.928	<0.001	0.008	Co-occurrence
NRAS	U2AF1_S34	1498	32	17	4	>3	0.001	0.009	Co-occurrence
CBL	U2AF1_R156_Q157	1491	19	37	4	>3	0.003	0.02	Co-occurrence
TET2	DNMT3A	1319	150	64	18	1.306	0.003	0.021	Co-occurrence
SF3B1	CEBPA	1467	57	22	5	2.548	0.004	0.026	Co-occurrence
U2AF1_R156_Q157	CSF3R	1472	36	38	5	2.428	0.005	0.033	Co-occurrence
CSF3R	PTPN11	1498	40	10	3	>3	0.005	0.033	Co-occurrence
DNMT3A	KIT	1459	78	10	4	2.903	0.005	0.033	Co-occurrence
TET2	RUNX1	1339	155	44	13	1.352	0.007	0.049	Co-occurrence
U2AF1_S34	FLT3	1522	19	8	2	>3	0.007	0.049	Co-occurrence
TET2	CBL	1367	161	16	7	1.893	0.008	0.053	Co-occurrence
DNMT3A	IDH1	1449	77	20	5	2.234	0.008	0.053	Co-occurrence
RUNX1	CBL	1475	53	19	4	2.551	0.009	0.053	Co-occurrence
TET2	PTPN11	1375	163	8	5	2.398	0.009	0.053	Co-occurrence
RUNX1	NRAS	1463	52	31	5	2.182	0.009	0.053	Co-occurrence
NRAS	DNMT3A	1439	30	76	6	1.921	0.01	0.058	Co-occurrence
TET2	U2AF1_other	1381	165	2	3	>3	0.011	0.061	Co-occurrence
NRAS	CSF3R	1476	32	39	4	2.242	0.016	0.09	Co-occurrence
U2AF1_R156_Q157	IDH2	1476	37	34	4	2.231	0.016	0.091	Co-occurrence
CEBPA	ZRSR2	1495	24	29	3	2.688	0.017	0.092	Co-occurrence
TET2	ZRSR2	1359	160	24	8	1.501	0.017	0.093	Co-occurrence
JAK2	PTPN11	546	992	9	4	-2.031	0.017	0.093	Mutual exclusivity
CALR	IDH2	1271	242	37	1	-2.817	0.022	0.114	Mutual exclusivity
CALR	EZH2	1275	230	33	13	1.127	0.023	0.12	Co-occurrence
DNMT3A	ZRSR2	1442	77	27	5	1.794	0.024	0.121	Co-occurrence
DNMT3A	U2AF1_other	1466	80	3	2	>3	0.025	0.124	Co-occurrence
SRSF2	CBL	1416	112	18	5	1.812	0.025	0.124	Co-occurrence
TET2	EZH2	1347	158	36	10	1.244	0.026	0.128	Co-occurrence
ZRSR2	PTPN11	1508	30	11	2	>3	0.028	0.133	Co-occurrence
SETBP1	CBL	1485	43	20	3	2.373	0.029	0.133	Co-occurrence
CBL	EZH2	1485	20	43	3	2.373	0.029	0.133	Co-occurrence
SRSF2	ZRSR2	1408	111	26	6	1.55	0.029	0.133	Co-occurrence
SETBP1	FLT3	1497	44	8	2	>3	0.033	0.15	Co-occurrence
SRSF2	FLT3	1427	114	7	3	2.423	0.034	0.151	Co-occurrence
SRSF2	IDH1	1414	112	20	5	1.658	0.035	0.152	Co-occurrence
ASXL1	FLT3	1334	207	6	4	2.103	0.036	0.152	Co-occurrence
NRAS	ZRSR2	1486	33	29	3	2.22	0.036	0.152	Co-occurrence
TET2	SF3B1	1333	156	50	12	1.036	0.036	0.152	Co-occurrence
RUNX1	U2AF1_S34	1476	54	18	3	2.188	0.039	0.163	Co-occurrence
JAK2	FLT3	548	993	7	3	-2.08	0.041	0.168	Mutual exclusivity
PTPN11	U2AF1_other	1534	12	4	1	>3	0.041	0.168	Co-occurrence
KIT	IDH2	1501	12	36	2	2.797	0.044	0.176	Co-occurrence
KIT	U2AF1_other	1533	13	4	1	>3	0.044	0.176	Co-occurrence
SRSF2	JAK2	503	52	931	65	-0.566	0.045	0.177	Mutual exclusivity
DNMT3A	IDH2	1436	77	33	5	1.499	0.046	0.179	Co-occurrence
SRSF2	CEBPA	1412	112	22	5	1.519	0.047	0.181	Co-occurrence
CEBPA	U2AF1_S34	1505	25	19	2	2.664	0.05	0.189	Co-occurrence
PTPN11	EZH2	1494	11	44	2	2.626	0.055	0.204	Co-occurrence
TET2	KIT	1373	164	10	4	1.744	0.056	0.206	Co-occurrence
ZRSR2	CSF3R	1479	29	40	3	1.935	0.056	0.206	Co-occurrence
SF3B1	FLT3	1481	60	8	2	2.625	0.058	0.208	Co-occurrence
RUNX1	U2AF1_R156_Q157	1457	53	37	4	1.571	0.06	0.215	Co-occurrence
SF3B1	CBL	1469	59	20	3	1.901	0.061	0.215	Co-occurrence
SRSF2	MPL	1387	109	47	8	1.115	0.062	0.218	Co-occurrence
SETBP1	ZRSR2	1476	43	29	3	1.828	0.066	0.23	Co-occurrence
TET2	U2AF1_S34	1367	163	16	5	1.39	0.068	0.232	Co-occurrence
RUNX1	CEBPA	1470	54	24	3	1.767	0.074	0.25	Co-occurrence
SF3B1	IDH1	1467	59	22	3	1.762	0.075	0.251	Co-occurrence
NRAS	JAK2	537	18	978	18	-0.865	0.08	0.264	Mutual exclusivity
ASXL1	IDH2	1311	202	29	9	1.01	0.088	0.29	Co-occurrence
DNMT3A	U2AF1_S34	1451	79	18	3	1.614	0.095	0.31	Co-occurrence
TP53	DNMT3A	1427	42	77	5	1.142	0.098	0.316	Co-occurrence
ZRSR2	U2AF1_other	1515	31	4	1	>3	0.099	0.316	Co-occurrence
IDH2	EZH2	1470	35	43	3	1.551	0.1	0.316	Co-occurrence
MPL	ZRSR2	1467	52	29	3	1.545	0.101	0.317	Co-occurrence
SF3B1	KIT	1477	60	12	2	2.037	0.105	0.325	Co-occurrence
SF3B1	CALR	1251	57	238	5	-1.117	0.108	0.331	Mutual exclusivity
KIT	PTPN11	1525	13	12	1	>3	0.112	0.339	Co-occurrence
IDH2	U2AF1_other	1509	37	4	1	>3	0.117	0.351	Co-occurrence
SETBP1	U2AF1_R156_Q157	1467	43	38	3	1.429	0.119	0.355	Co-occurrence
IDH1	IDH2	1490	23	36	2	1.848	0.123	0.364	Co-occurrence
U2AF1_R156_Q157	U2AF1_other	1506	40	4	1	>3	0.126	0.367	Co-occurrence
SETBP1	U2AF1_S34	1486	44	19	2	1.83	0.127	0.367	Co-occurrence
NRAS	CEBPA	1490	34	25	2	1.81	0.128	0.368	Co-occurrence
CSF3R	U2AF1_other	1504	42	4	1	>3	0.131	0.374	Co-occurrence
SF3B1	DNMT3A	1413	56	76	6	0.994	0.137	0.379	Co-occurrence
CBL	FLT3	1519	22	9	1	2.94	0.139	0.379	Co-occurrence
ASXL1	U2AF1_other	1337	209	3	2	2.092	0.139	0.379	Co-occurrence
U2AF1_R156_Q157	IDH1	1487	39	23	2	1.729	0.14	0.379	Co-occurrence
SETBP1	U2AF1_other	1501	45	4	1	>3	0.14	0.379	Co-occurrence
CEBPA	IDH2	1488	25	36	2	1.725	0.14	0.379	Co-occurrence
DNMT3A	PTPN11	1458	80	11	2	1.728	0.148	0.397	Co-occurrence
U2AF1_R156_Q157	CEBPA	1485	39	25	2	1.607	0.158	0.422	Co-occurrence
TP53	EZH2	1461	44	43	3	1.212	0.16	0.424	Co-occurrence
TET2	CALR	1160	148	223	20	-0.509	0.177	0.465	Mutual exclusivity
TET2	IDH1	1363	163	20	5	1.064	0.181	0.47	Co-occurrence
SF3B1	U2AF1_other	1485	61	4	1	2.606	0.185	0.477	Co-occurrence
U2AF1_R156_Q157	CALR	1270	38	240	3	-1.259	0.189	0.484	Mutual exclusivity
JAK2	ZRSR2	540	979	15	17	-0.678	0.196	0.497	Mutual exclusivity
TET2	U2AF1_R156_Q157	1349	161	34	7	0.787	0.199	0.502	Co-occurrence
TET2	CEBPA	1361	163	22	5	0.924	0.204	0.504	Co-occurrence
KIT	IDH1	1513	13	24	1	2.278	0.204	0.504	Co-occurrence
CEBPA	PTPN11	1512	26	12	1	2.277	0.205	0.504	Co-occurrence
U2AF1_R156_Q157	ZRSR2	1480	39	30	2	1.339	0.206	0.504	Co-occurrence
RUNX1	CSF3R	1454	54	40	3	1.014	0.208	0.504	Co-occurrence
TP53	JAK2	534	21	970	26	-0.553	0.217	0.522	Mutual exclusivity
TET2	CSF3R	1347	161	36	7	0.702	0.219	0.522	Co-occurrence
SETBP1	CALR	1266	42	239	4	-0.987	0.221	0.522	Mutual exclusivity
RUNX1	DNMT3A	1417	52	77	5	0.823	0.222	0.522	Co-occurrence
SRSF2	PTPN11	1423	115	11	2	1.17	0.256	0.6	Co-occurrence
CBL	U2AF1_S34	1508	22	20	1	1.777	0.271	0.629	Co-occurrence
IDH2	PTPN11	1501	37	12	1	1.757	0.277	0.637	Co-occurrence
U2AF1_S34	IDH1	1506	20	24	1	1.65	0.291	0.665	Co-occurrence
U2AF1_R156_Q157	PTPN11	1498	40	12	1	1.642	0.295	0.669	Co-occurrence
TET2	FLT3	1375	166	8	2	1.05	0.296	0.669	Co-occurrence
TP53	NRAS	1470	45	34	2	0.942	0.298	0.669	Co-occurrence
SETBP1	DNMT3A	1427	42	78	4	0.801	0.302	0.672	Co-occurrence
RUNX1	FLT3	1485	56	9	1	1.559	0.313	0.685	Co-occurrence
CBL	IDH1	1504	22	24	1	1.51	0.314	0.685	Co-occurrence
KIT	U2AF1_R156_Q157	1497	13	40	1	1.525	0.314	0.685	Co-occurrence
CBL	CEBPA	1502	22	26	1	1.393	0.334	0.724	Co-occurrence
TET2	TP53	1343	161	40	7	0.546	0.341	0.729	Co-occurrence
KIT	EZH2	1492	13	45	1	1.351	0.345	0.729	Co-occurrence
U2AF1_R156_Q157	EZH2	1466	39	44	2	0.773	0.345	0.729	Co-occurrence
DNMT3A	CBL	1448	80	21	2	0.786	0.346	0.729	Co-occurrence
NRAS	CALR	1275	33	240	3	-1.05	0.35	0.734	Mutual exclusivity
TP53	U2AF1_R156_Q157	1465	45	39	2	0.739	0.355	0.74	Co-occurrence
CEBPA	IDH1	1500	26	24	1	1.265	0.358	0.74	Co-occurrence
SRSF2	U2AF1_R156_Q157	1394	116	40	1	-1.735	0.362	0.745	Mutual exclusivity
SF3B1	ZRSR2	1459	60	30	2	0.697	0.369	0.754	Co-occurrence
TP53	CSF3R	1463	45	41	2	0.665	0.377	0.766	Co-occurrence
CBL	ZRSR2	1497	22	31	1	1.134	0.383	0.773	Co-occurrence
RUNX1	PTPN11	1482	56	12	1	1.141	0.387	0.776	Co-occurrence
SRSF2	U2AF1_S34	1413	117	21	0	<-3	0.398	0.788	Mutual exclusivity
TP53	SETBP1	1458	47	46	0	<-3	0.398	0.788	Mutual exclusivity
SF3B1	IDH2	1451	62	38	0	<-3	0.4	0.788	Mutual exclusivity
SF3B1	U2AF1_R156_Q157	1448	62	41	0	<-3	0.407	0.791	Mutual exclusivity
ZRSR2	IDH1	1495	31	24	1	1.007	0.409	0.791	Co-occurrence
CALR	IDH1	1285	241	23	2	-1.109	0.409	0.791	Mutual exclusivity
SF3B1	PTPN11	1477	61	12	1	1.013	0.413	0.794	Co-occurrence
ASXL1	CALR	1134	174	206	37	0.227	0.416	0.794	Co-occurrence
NRAS	CBL	1493	35	22	1	0.955	0.42	0.794	Co-occurrence
DNMT3A	FLT3	1460	81	9	1	1.002	0.42	0.794	Co-occurrence
ASXL1	KIT	1329	208	11	3	0.801	0.423	0.794	Co-occurrence
U2AF1_R156_Q157	U2AF1_S34	1490	40	20	1	0.897	0.432	0.808	Co-occurrence
CBL	IDH2	1491	22	37	1	0.873	0.437	0.812	Co-occurrence
CALR	PTPN11	1298	240	10	3	0.698	0.441	0.815	Co-occurrence
NRAS	IDH1	1491	35	24	1	0.828	0.447	0.82	Co-occurrence
ASXL1	SF3B1	1284	205	56	6	-0.575	0.451	0.823	Mutual exclusivity
CBL	CSF3R	1486	22	42	1	0.685	0.479	0.868	Co-occurrence
SF3B1	MPL	1437	59	52	3	0.491	0.481	0.868	Co-occurrence
TET2	JAK2	499	56	884	112	0.175	0.497	0.892	Co-occurrence
CSF3R	IDH1	1484	42	24	1	0.558	0.508	0.906	Co-occurrence
JAK2	CBL	545	983	10	13	-0.472	0.512	0.907	Mutual exclusivity
ASXL1	TP53	1301	203	39	8	0.395	0.514	0.907	Co-occurrence
SRSF2	DNMT3A	1356	113	78	4	-0.7	0.517	0.907	Mutual exclusivity
CALR	CSF3R	1273	235	35	8	0.308	0.529	0.915	Co-occurrence
MPL	DNMT3A	1418	51	78	4	0.512	0.531	0.915	Co-occurrence
SETBP1	IDH1	1481	45	24	1	0.456	0.532	0.915	Co-occurrence
MPL	U2AF1_S34	1476	54	20	1	0.451	0.534	0.915	Co-occurrence
CEBPA	CSF3R	1482	26	42	1	0.441	0.535	0.915	Co-occurrence
TP53	IDH1	1480	46	24	1	0.423	0.539	0.918	Co-occurrence
ZRSR2	IDH2	1482	31	37	1	0.37	0.552	0.934	Co-occurrence
CEBPA	EZH2	1479	26	45	1	0.338	0.56	0.937	Co-occurrence
SETBP1	CEBPA	1479	45	26	1	0.338	0.56	0.937	Co-occurrence
SRSF2	EZH2	1390	115	44	2	-0.864	0.575	0.954	Mutual exclusivity
SRSF2	TP53	1389	115	45	2	-0.898	0.575	0.954	Mutual exclusivity
MPL	IDH1	1472	54	24	1	0.184	0.597	0.986	Co-occurrence
ZRSR2	EZH2	1474	31	45	1	0.079	0.622	1	Co-occurrence
CALR	ZRSR2	1282	237	26	6	0.32	0.622	1	Co-occurrence
TP53	ZRSR2	1472	47	32	0	<-3	0.622	1	Mutual exclusivity
JAK2	U2AF1_R156_Q157	542	968	13	28	0.27	0.625	1	Co-occurrence
TP53	IDH2	1466	47	38	0	<-3	0.627	1	Mutual exclusivity
TET2	SETBP1	1343	162	40	6	0.314	0.628	1	Co-occurrence
NRAS	MPL	1460	36	55	0	<-3	0.636	1	Mutual exclusivity
JAK2	U2AF1_S34	549	981	6	15	0.484	0.648	1	Co-occurrence
DNMT3A	CEBPA	1444	80	25	2	0.53	0.651	1	Co-occurrence
MPL	CSF3R	1455	53	41	2	0.421	0.663	1	Co-occurrence
RUNX1	JAK2	533	22	961	35	-0.181	0.674	1	Mutual exclusivity
SETBP1	MPL	1452	44	53	2	0.316	0.677	1	Co-occurrence
MPL	EZH2	1452	53	44	2	0.316	0.677	1	Co-occurrence
TP53	MPL	1451	45	53	2	0.283	0.682	1	Co-occurrence
RUNX1	SETBP1	1450	55	44	2	0.261	0.685	1	Co-occurrence
TP53	CALR	1267	41	237	6	-0.354	0.687	1	Mutual exclusivity
SF3B1	CSF3R	1448	60	41	2	0.235	0.689	1	Co-occurrence
RUNX1	TP53	1449	55	45	2	0.228	0.69	1	Co-occurrence
SF3B1	SETBP1	1445	60	44	2	0.131	0.706	1	Co-occurrence
KIT	CALR	1295	13	242	1	-1.281	0.71	1	Mutual exclusivity
SF3B1	TP53	1444	60	45	2	0.097	0.712	1	Co-occurrence
DNMT3A	U2AF1_R156_Q157	1429	81	40	1	-1.181	0.721	1	Mutual exclusivity
JAK2	IDH2	543	970	12	26	0.278	0.732	1	Co-occurrence
ASXL1	DNMT3A	1270	199	70	12	0.13	0.741	1	Co-occurrence
DNMT3A	CALR	1240	68	229	14	0.157	0.754	1	Co-occurrence
CALR	U2AF1_S34	1289	241	19	2	-0.829	0.76	1	Mutual exclusivity
CEBPA	CALR	1284	24	240	3	-0.58	0.788	1	Mutual exclusivity
SRSF2	SF3B1	1377	112	57	5	0.109	0.806	1	Co-occurrence
JAK2	DNMT3A	527	942	28	54	0.11	0.813	1	Co-occurrence
RUNX1	CALR	1259	49	235	8	-0.193	0.854	1	Mutual exclusivity
SF3B1	JAK2	532	23	957	39	-0.085	0.893	1	Mutual exclusivity
ZRSR2	U2AF1_S34	1498	32	21	0	<-3	1	1	Mutual exclusivity
TET2	MPL	1334	162	49	6	0.012	1	1	Co-occurrence
TET2	IDH2	1349	164	34	4	-0.047	1	1	Mutual exclusivity
KIT	U2AF1_S34	1516	14	21	0	<-3	1	1	Mutual exclusivity
SF3B1	EZH2	1444	61	45	1	-0.927	1	1	Mutual exclusivity
ASXL1	MPL	1292	204	48	7	-0.115	1	1	Mutual exclusivity
SF3B1	NRAS	1454	61	35	1	-0.554	1	1	Mutual exclusivity
CBL	CALR	1288	20	240	3	-0.313	1	1	Mutual exclusivity
MPL	U2AF1_R156_Q157	1456	54	40	1	-0.569	1	1	Mutual exclusivity
TP53	U2AF1_S34	1483	47	21	0	<-3	1	1	Mutual exclusivity
RUNX1	MPL	1441	55	53	2	-0.016	1	1	Mutual exclusivity
MPL	PTPN11	1483	55	13	0	<-3	1	1	Mutual exclusivity
MPL	IDH2	1459	54	37	1	-0.454	1	1	Mutual exclusivity
U2AF1_S34	PTPN11	1517	21	13	0	<-3	1	1	Mutual exclusivity
SF3B1	U2AF1_S34	1468	62	21	0	<-3	1	1	Mutual exclusivity
RUNX1	SF3B1	1434	55	60	2	-0.202	1	1	Mutual exclusivity
NRAS	U2AF1_R156_Q157	1475	35	40	1	0.075	1	1	Co-occurrence
KIT	CBL	1514	14	23	0	<-3	1	1	Mutual exclusivity
IDH2	U2AF1_both	1512	38	1	0	<-3	1	1	Mutual exclusivity
DNMT3A	CSF3R	1428	80	41	2	-0.2	1	1	Mutual exclusivity
RUNX1	ZRSR2	1463	56	31	1	-0.247	1	1	Mutual exclusivity
CBL	PTPN11	1515	23	13	0	<-3	1	1	Mutual exclusivity
CSF3R	U2AF1_S34	1487	43	21	0	<-3	1	1	Mutual exclusivity
CBL	U2AF1_both	1527	23	1	0	<-3	1	1	Mutual exclusivity
U2AF1_other	EZH2	1500	5	46	0	<-3	1	1	Mutual exclusivity
U2AF1_S34	EZH2	1484	21	46	0	<-3	1	1	Mutual exclusivity
KIT	CSF3R	1494	14	43	0	<-3	1	1	Mutual exclusivity
MPL	CBL	1473	55	23	0	<-3	1	1	Mutual exclusivity
CALR	U2AF1_both	1307	243	1	0	<-3	1	1	Mutual exclusivity
JAK2	KIT	550	987	5	9	0.004	1	1	Co-occurrence
PTPN11	FLT3	1528	13	10	0	<-3	1	1	Mutual exclusivity
KIT	CEBPA	1510	14	27	0	<-3	1	1	Mutual exclusivity
U2AF1_S34	IDH2	1492	21	38	0	<-3	1	1	Mutual exclusivity
TP53	CBL	1481	47	23	0	<-3	1	1	Mutual exclusivity
CSF3R	FLT3	1498	43	10	0	<-3	1	1	Mutual exclusivity
MPL	KIT	1482	55	14	0	<-3	1	1	Mutual exclusivity
ZRSR2	U2AF1_both	1518	32	1	0	<-3	1	1	Mutual exclusivity
KIT	ZRSR2	1505	14	32	0	<-3	1	1	Mutual exclusivity
RUNX1	U2AF1_other	1489	57	5	0	<-3	1	1	Mutual exclusivity
MPL	FLT3	1486	55	10	0	<-3	1	1	Mutual exclusivity
SRSF2	U2AF1_other	1429	117	5	0	<-3	1	1	Mutual exclusivity
SETBP1	U2AF1_both	1504	46	1	0	<-3	1	1	Mutual exclusivity
EZH2	U2AF1_both	1504	46	1	0	<-3	1	1	Mutual exclusivity
RUNX1	KIT	1480	57	14	0	<-3	1	1	Mutual exclusivity
IDH1	PTPN11	1513	25	13	0	<-3	1	1	Mutual exclusivity
CSF3R	IDH2	1471	42	37	1	-0.079	1	1	Mutual exclusivity
TP53	PTPN11	1491	47	13	0	<-3	1	1	Mutual exclusivity
JAK2	IDH1	546	980	9	16	-0.014	1	1	Mutual exclusivity
IDH2	FLT3	1503	38	10	0	<-3	1	1	Mutual exclusivity
CEBPA	U2AF1_both	1523	27	1	0	<-3	1	1	Mutual exclusivity
KIT	U2AF1_both	1536	14	1	0	<-3	1	1	Mutual exclusivity
RUNX1	U2AF1_both	1493	57	1	0	<-3	1	1	Mutual exclusivity
NRAS	FLT3	1505	36	10	0	<-3	1	1	Mutual exclusivity
EZH2	FLT3	1495	46	10	0	<-3	1	1	Mutual exclusivity
U2AF1_S34	U2AF1_both	1529	21	1	0	<-3	1	1	Mutual exclusivity
MPL	CEBPA	1470	54	26	1	0.066	1	1	Co-occurrence
U2AF1_other	U2AF1_both	1545	5	1	0	<-3	1	1	Mutual exclusivity
FLT3	U2AF1_both	1540	10	1	0	<-3	1	1	Mutual exclusivity
JAK2	U2AF1_both	555	995	0	1	>3	1	1	Co-occurrence
IDH1	FLT3	1516	25	10	0	<-3	1	1	Mutual exclusivity
TP53	CEBPA	1477	47	27	0	<-3	1	1	Mutual exclusivity
U2AF1_R156_Q157	U2AF1_both	1509	41	1	0	<-3	1	1	Mutual exclusivity
NRAS	U2AF1_other	1510	36	5	0	<-3	1	1	Mutual exclusivity
SETBP1	KIT	1491	46	14	0	<-3	1	1	Mutual exclusivity
PTPN11	U2AF1_both	1537	13	1	0	<-3	1	1	Mutual exclusivity
DNMT3A	U2AF1_both	1468	82	1	0	<-3	1	1	Mutual exclusivity
NRAS	PTPN11	1502	36	13	0	<-3	1	1	Mutual exclusivity
ZRSR2	FLT3	1509	32	10	0	<-3	1	1	Mutual exclusivity
SRSF2	KIT	1421	116	13	1	-0.086	1	1	Mutual exclusivity
SRSF2	U2AF1_both	1433	117	1	0	<-3	1	1	Mutual exclusivity
DNMT3A	EZH2	1425	80	44	2	-0.305	1	1	Mutual exclusivity
CEBPA	FLT3	1514	27	10	0	<-3	1	1	Mutual exclusivity
JAK2	CEBPA	545	979	10	17	-0.08	1	1	Mutual exclusivity
MPL	U2AF1_other	1491	55	5	0	<-3	1	1	Mutual exclusivity
SETBP1	IDH2	1468	45	37	1	-0.182	1	1	Mutual exclusivity
NRAS	KIT	1501	36	14	0	<-3	1	1	Mutual exclusivity
IDH1	U2AF1_other	1521	25	5	0	<-3	1	1	Mutual exclusivity
CALR	FLT3	1299	242	9	1	-0.746	1	1	Mutual exclusivity
TET2	U2AF1_both	1382	168	1	0	<-3	1	1	Mutual exclusivity
ASXL1	U2AF1_both	1339	211	1	0	<-3	1	1	Mutual exclusivity
U2AF1_S34	U2AF1_other	1525	21	5	0	<-3	1	1	Mutual exclusivity
U2AF1_R156_Q157	FLT3	1500	41	10	0	<-3	1	1	Mutual exclusivity
JAK2	U2AF1_other	553	993	2	3	-0.26	1	1	Mutual exclusivity
CSF3R	U2AF1_both	1507	43	1	0	<-3	1	1	Mutual exclusivity
CBL	U2AF1_other	1523	23	5	0	<-3	1	1	Mutual exclusivity
IDH1	U2AF1_both	1525	25	1	0	<-3	1	1	Mutual exclusivity
TP53	KIT	1490	47	14	0	<-3	1	1	Mutual exclusivity
TP53	FLT3	1494	47	10	0	<-3	1	1	Mutual exclusivity
MPL	U2AF1_both	1495	55	1	0	<-3	1	1	Mutual exclusivity
SF3B1	U2AF1_both	1488	62	1	0	<-3	1	1	Mutual exclusivity
U2AF1_other	FLT3	1536	5	10	0	<-3	1	1	Mutual exclusivity
KIT	FLT3	1527	14	10	0	<-3	1	1	Mutual exclusivity
TP53	U2AF1_other	1499	47	5	0	<-3	1	1	Mutual exclusivity
NRAS	U2AF1_both	1514	36	1	0	<-3	1	1	Mutual exclusivity
TP53	U2AF1_both	1503	47	1	0	<-3	1	1	Mutual exclusivity
CALR	U2AF1_other	1303	243	5	0	<-3	1	1	Mutual exclusivity
CEBPA	U2AF1_other	1519	27	5	0	<-3	1	1	Mutual exclusivity
